# Supplementary material
Source: PubMed Central journal article supplement (PMC5032833)
Supplement: NIHMS815350-supplement-main_SI_file.pdf [file NIHMS815350-supplement-main_SI_file.pdf]

## Supporting Information

**South (S)- and North (N)-Methanocarba-7-Deazaadenosine Analogues as Inhibitors of Human Adenosine Kinase**

Kiran S. Toti, Danielle Osborne, Antonella Ciancetta, Detlev Boison, Kenneth A. Jacobson\*

*Contents:*

|                                                                                        |        |
|----------------------------------------------------------------------------------------|--------|
| Synthesis of intermediate <b>24</b>                                                    | S2-6   |
| An alternate route to intermediate <b>51</b>                                           | S7-8   |
| LCMS analysis of compound <b>30</b> as substrate/inhibitor                             | S9-13  |
| Molecular modeling                                                                     | S14-19 |
| Off-target activity of compounds <b>38a</b> and <b>55</b> at 5-HT (serotonin) receptor | S20-21 |
| NMR, HRMS and purity spectra of the final compounds                                    | S22-72 |

A modification of the previously reported route<sup>[1,2]</sup> to intermediate **24** was devised in order to achieve a larger scale preparation. The major modification over the previously reported route was the use of acetone cyanohydrin/ LiH combination in place of lithium cyanide in a synthetically challenging 10<sup>th</sup> step. This led to a considerably higher ratio of product to byproduct for this step and resulted in the key intermediate **24** with 0.04% overall yield over 16 steps. The yield was largely limited by the low yield of the isopropylidene isomerization in step h, which was only 11% (barring that the total yield would be 0.34%). Other contributing low yield steps were d, f, g and n. An improvement would greatly increase the global yield and hence, further optimization may be needed before adapting this route to a production process.

### Scheme S1: Synthesis of intermediate **24**.

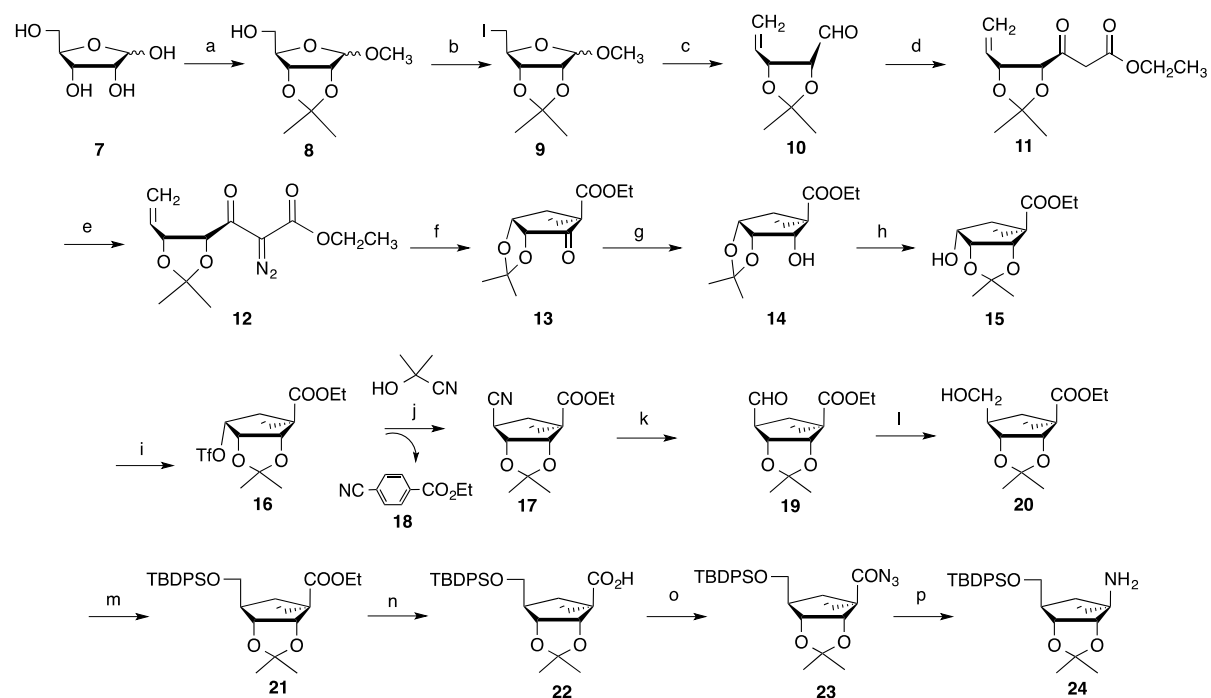

**Reagents and conditions:** (a) acetone, MeOH, HCl, overnight, rt, 91%; (b) PPh<sub>3</sub>, I<sub>2</sub>, imidazole, CH<sub>3</sub>CN, toluene, 70 °C, 1 h, 85%; (c) Zn, MeOH, 60 °C, 20 min, 83%; (d) N<sub>2</sub>CHCO<sub>2</sub>Et, SnCl<sub>2</sub>, CH<sub>2</sub>Cl<sub>2</sub>, 0 °C, 30 min, 38%; (e) TsN<sub>3</sub>, CH<sub>3</sub>CN, TEA, 0 °C, 30 min, 99%; (f) CuI, toluene, 80-83 °C, 36 h, 40%; (g) NaBH<sub>4</sub>, EtOH, 15 °C, 1 h, 48%; (h) TFA, acetone, 22-25 °C, 40 h, 11%; (i) Tf<sub>2</sub>O, pyridine, CH<sub>2</sub>Cl<sub>2</sub>, 0 °C, 30 min; (j) LiH, DMF, CH<sub>2</sub>Cl<sub>2</sub>, 75%, often lower yield, produces side product **18**; (k) H<sub>2</sub>/Pd/C, MeOH, HOAc, 25 °C, 2 h, 79%; (l) NaBH<sub>4</sub>, MeOH, rt, 30 min, 62%; (m) TBDPSCl, imidazole, DMF, 25 °C, overnight, 62%; (n) NaOH, 80 °C, 2 h, 48%; (o) (PhO)<sub>2</sub>P(O)Cl, DIPEA, NaN<sub>3</sub>, acetone, 22-25 °C, 30 min, 91%; (p) benzene, THF, H<sub>2</sub>O, 30 min, rt, 74%.

**[(4R,6R)-6-Methoxy-2,2-dimethyl-tetrahydro-2H-furo[3,4-d][1,3]dioxol-4-yl]methanol (8).** Into a 20-L 4-necked round-bottom flask purged and maintained with an inert

atmosphere of nitrogen, was placed D-ribose **7** (2.00 kg, 13.32 mol, 1.00 equiv.), acetone (4.00 L), 2,2-dimethoxypropane (4.00 L) and methanol (4.00 L). The reaction mixture was cooled to 0 °C and added a saturated solution of hydrogen chloride in methanol (0.80 L) dropwise with stirring. The resulting solution was stirred overnight at room temperature. The pH was adjusted to 7 with aqueous NaHCO<sub>3</sub> and stirred for additional 40 min. The solids were removed by filtration, and the filtrate was concentrated under vacuum. The residue after concentration was dissolved in ethyl acetate (24 L) and washed with brine (24 L). The aqueous phase was extracted with ethyl acetate (12 L x 2) and the combined organic layer was dried over anhydrous sodium sulfate. The drying agent was filtered off and the filtrate concentrated under vacuum to give title compound as yellow oil. A total of 13 batches (26 kg) resulted in 32.5 kg of the title compound with 91% average yield.

**(4S,6R)-4-(Iodomethyl)-6-methoxy-2,2-dimethyl-tetrahydro-2H-furo[3,4-d][1,3]dioxole (9)**. Into a 20-L 4-necked round-bottom flask purged and maintained with an inert atmosphere of nitrogen, was placed **8** (1.60 kg, 7.83 moles, 1.00 equiv.), imidazole (0.80 kg, 11.74 moles, 1.50 equiv.), toluene (8.00 L), CH<sub>3</sub>CN (2.00 L) and the mixture was stirred for 30 min. This was followed by the addition of PPh<sub>3</sub> (2157 g, 8.22 moles, 1.05 equiv.) portion wise with stirring and then at 40 °C was added I<sub>2</sub> (2381 g, 9.41 moles, 1.20 equiv.) in several batches with stirring. The reaction mixture was stirred at 70 °C for 1 h in an oil bath and then cooled to 0 °C with an ice/salt bath. The solids formed were removed by filtration and the filtrate was concentrated under vacuum. The residue was treated with hexane (32 L) and the solids formed were filtered off. Concentration of the filtrate under vacuum gave the title compound as yellow oil. A total of 20 batches (32.5 kg) resulted in 42.4 kg of the required product in 85% average yield.

**5-Ethenyl-2,2-dimethyl-1,3-dioxolane-4-carbaldehyde (10)**. Into a 20-L 4-necked round-bottom flask purged and maintained with an inert atmosphere of nitrogen, was placed **9** (3.28 kg, 10.44 moles, 1.00 equiv.) and methanol (8.00 L). This was followed by the addition of Zn (497 g, 7.65 moles, 1.20 equiv.) in several batches. The reaction solution was stirred at 60 °C for 20 min in a hot bath. The solids were removed by filtration, and the filtrate was concentrated under vacuum. The residue was diluted with water (12 L) and the solids were filtered off. The filtrate was extracted with ethyl acetate (12 L). The organic layer was washed with brine (15 L), dried over anhydrous sodium sulfate and concentrated under vacuum. The resulting residue was treated with 6 L of hexane and the solids were filtered off. The filtrate was concentrated under vacuum to afford title compound as brown oil. A total of 13 batches (42.4 kg) resulted in 14.77 kg of the desired product in 83% average yield.

**Ethyl 3-(5-ethenyl-2,2-dimethyl-1,3-dioxolan-4-yl)-3-oxopropanoate (11)**. Into a 20-L 4-necked round-bottom flask purged and maintained with an inert atmosphere of nitrogen, was placed **10** (1200 g, 7.68 moles, 1.00 equiv.), dichloromethane (2.40 L), stannous chloride (175 g, 0.923 moles, 0.12 equiv.) sequentially. At 0 °C was added with stirring, a solution of ethyl 2-diazoacetate (701.5 g, 6.15 moles, 0.80 equiv.) in dichloromethane (9.60 L) dropwise over 3h. The reaction mixture was allowed to warm to room temperature in 30 min and concentrated under vacuum. The product was diluted with of hexane (4.8 L), stirred at 0 °C for 30 min, solids were removed by filtration, and the filtrate was concentrated under vacuum. The residue was purified by silica gel column chromatography (ethyl acetate/petroleum ether,

1:60→1:30). A total of 11 batches (14.77 kg) resulted in 7.81 kg (38%) of the title compound as a yellow oil.

**Ethyl 2-diazo-3-(5-ethenyl-2,2-dimethyl-1,3-dioxolan-4-yl)-3-oxopropanoate (12).** Into a 20-L 4-necked round-bottom flask purged and maintained with an inert atmosphere of nitrogen, was placed **11** (2.00 kg, 8.26 moles, 1.00 equiv.), MeCN (10 L) and tosyl azide (1628 g, 8.26 moles, 1.00 equiv.). Followed by at 0 °C, was added TEA (1669 g, 16.49 moles, 2.00 equiv.) dropwise with stirring. The reaction mixture was stirred for 30 min at 0 °C and then allowed to attain room temperature in 30 min. The reaction mixture was concentrated under vacuum and the residue purified by silica-gel column chromatography (ethyl acetate/petroleum ether, 1:60→1:15). A total of 4 batches (7.81 kg) resulted in 8.9 kg (99%) of the title compound as a yellow oil.

**Ethyl (1R,4R)-8,8-dimethyl-5-oxo-7,9-dioxatricyclo[4.3.0.0<sup>^</sup>[2,4]]nonane-4-carboxylate (13).** Into a 2-L 4-necked round-bottom flask purged and maintained with an inert atmosphere of nitrogen, was placed **12** (200 g, 0.745 moles, 1.00 equiv.), Toluene (2 L) and cuprous iodide (7.1 g, 37.28 mmol, 0.05 equiv.). The flask was evacuated and flushed three times with hydrogen, followed by flushing with nitrogen. The resulting solution was stirred at 80-83 °C for 36 h. The reaction mixture was subjected to filtration and the filtrate concentrated under reduced pressure. The residue was applied onto a silica-gel column and eluted with ethyl acetate/petroleum ether (1:15→1:8). A total of 45 batches (8.9 kg) resulted in 3.2 kg (40%) of the title compound as a yellow oil.

**Ethyl (1R,4R)-5-hydroxy-8,8-dimethyl-7,9-dioxatricyclo[4.3.0.0<sup>^</sup>[2,4]]nonane-4-carboxylate (14).** Into a 20-L 4-necked round-bottom flask purged and maintained with an inert atmosphere of nitrogen, was placed **13** (1.6 kg, 6.66 mol, 1.00 equiv.), ethanol (15.00 L) and then, at 0-10 °C was added NaBH<sub>4</sub> (253 g, 6.69 mol, 1.00 equiv.) in portions. The resulting solution was stirred for 1 h at 15 °C. The reaction was then quenched by the addition of 2 L of acetone and stirred for 1 h. The solvent mixture was concentrated under vacuum and the residue was dissolved in ethyl acetate (8 L). The organic layer was washed trice with brine (8 L), dried over anhydrous sodium sulfate and concentrated under vacuum. The product was diluted with hexane (3.2 L) and the solids were collected by filtration. A total of 2 batches (3.2 kg) resulted in 1.542 kg (48%) of the title compound **14** as a white solid.

**Ethyl (2R,5R)-5-hydroxy-8,8-dimethyl-7,9-dioxatricyclo[4.3.0.0<sup>^</sup>[2,4]]nonane-2-carboxylate (15).** Into a 10-L 4-necked round-bottom flask purged and maintained with an inert atmosphere of nitrogen, was placed **14** (300 g, 1.24 mol, 1.00 equiv.), acetone (6 L), CF<sub>3</sub>COOH (212 g, 1.86 mol, 1.50 equiv.) sequentially and stirred at 20-25 °C for 40 h. The reaction mixture was concentrated under vacuum, the residue dissolved in DCM (10 L) and treated with 10% aqueous Na<sub>2</sub>CO<sub>3</sub> until the pH = 9. The organic layer was separated, washed with brine, dried over anhydrous sodium sulfate, filtered, and the filtrate concentrated under vacuum. The crude product was purified by re-crystallization from cyclohexane. A total of 3 batches (900 g) resulted in 100 g (11%) of the title compound **15** as a white solid.

**Ethyl (2R,5R)-8,8-dimethyl-5-[(trifluoromethane)sulfonyloxy]-7,9-**

**dioxatricyclo[4.3.0.0<sup>^</sup>[2,4]]nonane-2-carboxylate (16).** Into a 2-L 4-necked round-bottom flask purged and maintained with an inert atmosphere of nitrogen, was placed **15** (50 g, 206.38 mmol, 1.00 equiv.), dichloromethane (500 mL), Pyridine (20 g, 252.84 mmol, 1.20 equiv.), then at 0 °C was added a solution of trifluoromethanesulfonic anhydride (70 g, 248.10 mmol, 1.20 equiv.) in dichloromethane (500 mL) dropwise with stirring. After stirred for additional 30 min at 0 °C in an ice/salt bath, hexane (500 mL) was added and the solids filtered. The solids were washed with a mixture of 3:7 ethyl acetate/ petroleum ether (200 mL). The filtrate was concentrated under vacuum and diluted with 250 ml dichloromethane. The resulting solution was used directly for the next step without further purification (The reaction was repeated for 17 times).

**Ethyl (2R,5R)-5-cyano-8,8-dimethyl-7,9-dioxatricyclo[4.3.0.0<sup>^</sup>[2,4]]nonane-2-carboxylate (17).** Into a 3-L 4-necked round-bottom flask purged and maintained with an inert atmosphere of nitrogen, was placed LiH (2.3 g, 281.81 mmol, 1.37 equiv.), N,N-dimethylformamide (250 mL) and cooled to 0 °C. To this was added 2-hydroxy-2-methylpropanenitrile (acetone cyanohydrin, 22 g, 258.51 mmol, 1.25 equiv.) dropwise and stirred at 10-15 °C for 6 h. The suspension was filtered in to a 3-L 4-necked round-bottom flask purged and maintained under nitrogen and the solids were washed with DMF (125 mL). Into another of nitrogen, was placed the solution in the first reaction. To this filtrate at 0 °C was added a solution of **16** (77 g, 205.70 mmol, 1.00 equiv.) in dichloromethane (250 mL) dropwise with stirring. The resulting solution was stirred for 30 min at 0 °C. Ethyl acetate (1 L) was added to the reaction mixture and the organic layer was washed thrice with 700 mL of brine, dried over anhydrous sodium sulfate and concentrated under vacuum. The residue was purified by silica gel column chromatography using ethyl acetate/petroleum ether (1:15) as eluent. A total of 18 batches (900 g of **15**) resulted in 700 g (75%) of the title compound **17** as colorless oil.

**Ethyl (2R,5S)-5-formyl-8,8-dimethyl-7,9-dioxatricyclo[4.3.0.0<sup>^</sup>[2,4]]nonane-2-carboxylate (19).** Into a 2-L 4-necked round-bottom flask purged and maintained with an inert atmosphere of nitrogen, was placed **17** (50 g, 198.98 mmol, 1.00 equiv.), methanol (600 mL), water (300 mL), acetic acid (100 mL), Palladium carbon (25 g), palladium hydroxide (25 g, 178.02 mmol, 0.89 equiv.). The flask was evacuated and flushed three times with nitrogen, followed by flushing with hydrogen. The resulting solution was stirred for 2 h at 25 °C in an oil bath. The solids were filtered out and the filtrate was concentrated under vacuum. The residue was diluted with ethyl acetate (500 mL), washed with aqueous NaHCO<sub>3</sub> (5x300 mL) and brine (3x300 mL). The organic layer was dried over anhydrous sodium sulfate and concentrated under vacuum. A total of 11 batches (550 g) resulted in 440 g (79%) of the title compound **19** as a light yellow oil.

**Ethyl (2R,5R)-5-(hydroxymethyl)-8,8-dimethyl-7,9-dioxatricyclo[4.3.0.0<sup>^</sup>[2,4]]nonane-2-carboxylate (20).** Into a 1-L 4-necked round-bottom flask purged and maintained with an inert atmosphere of nitrogen, was placed **19** (40 g, 157.31 mmol, 1.00 equiv.) and methanol (400 mL). This was followed by the addition of NaBH<sub>4</sub> (9 g, 244.40 mmol, 1.50 equiv.) in portions at 0 °C and stirred for 30 min at room temperature. The reaction was then quenched by the addition of 80 mL of acetone. The resulting mixture was concentrated under vacuum and the residue was dissolved in 300 mL of ethyl acetate. The organic phase was washed

with brine (2x200 mL), dried over anhydrous sodium sulfate and concentrated under vacuum. The residue was applied onto a silica gel column and eluted with a gradient of ethyl acetate/petroleum ether (1:6→1:3). Total of 11 batches (440 g) resulted in 176 g (40%) of the title compound **20** as a colorless oil.

**Ethyl (2R,5R)-5-[[*tert*-Butyldiphenylsilyl]oxy]methyl]-8,8-dimethyl-7,9-dioxatricyclo[4.3.0.0<sup>^</sup>[2,4]]nonane-2-carboxylate (**21**).** Into a 5-L 4-necked round-bottom flask purged and maintained with an inert atmosphere of nitrogen, was placed **20** (100 g, 390.18 mmol, 1.00 equiv.), N,N-dimethylformamide (2.5 L), Imidazole (13 g, 195.00 mmol, 0.50 equiv.) and *tert*-butyl(chloro)diphenylsilane (156 g, 567.56 mmol, 1.45 equiv.). The resulting mixture was stirred for 10 min and was added triethylamine (103 g, 1.02 mol, 2.60 equiv.) dropwise with stirring. The resulting solution was stirred for overnight at 25 °C. The reaction mixture was diluted with 6 L of 1:5 ethyl acetate/petroleum ether. The resulting mixture was washed with water (3 L) and brine (2x3 L). The organic layer was dried over anhydrous sodium sulfate and concentrated under vacuum. The residue was applied onto a silica gel column and eluted with ethyl acetate/petroleum ether (1:100→1:30). This resulted in 120 g (62%) of the title compound **21** as a colorless oil.

**(2R,5R)-5-[[*tert*-Butyldiphenylsilyl]oxy]methyl]-8,8-dimethyl-7,9-dioxatricyclo[4.3.0.0<sup>^</sup>[2,4]]nonane-2-carboxylic acid (**22**).** Into a 5-L 4-necked round-bottom flask purged and maintained with an inert atmosphere of nitrogen, was placed **21** (100 g, 202.14 mmol, 1.00 equiv.) and methanol (2 L). This was followed by a solution of NaOH (16 g, 400.03 mmol, 1.98 equiv.) in water (400 mL). The resulting solution was stirred for 2 h at 80 °C in an oil bath. The resulting mixture was concentrated under vacuum. The residue was diluted with 2 L of H<sub>2</sub>O. The pH was adjusted to 4-5 with HCl (5 M aqueous). The product was extracted in dichloromethane (2x2 L) and the combined organic layer was washed with water (3 L), dried over anhydrous sodium sulfate, and concentrated under vacuum. This resulted in 45 g (48%) of the title compound **22** as a brown solid.

**(2R,5R)-5-[[*tert*-Butyldiphenylsilyl]oxy]methyl]-8,8-dimethyl-7,9-dioxatricyclo[4.3.0.0<sup>^</sup>[2,4]]nonane-2-carbonyl azide (**23**).** Into a 5-L 4-necked round-bottom flask purged and maintained with an inert atmosphere of nitrogen, was placed **22** (104 g, 222.9 mmol, 1.00 equiv.), acetone (2.0 L) and DIPEA (35.0 g, 270.8 mmol, 1.20 equiv.). This was followed by the addition of diphenylphosphoryl chloride (DPCP, 72 g, 267.7 mmol, 1.20 equiv.). The resulting mixture was stirred for 30 min at room temperature. To this was added a solution of NaN<sub>3</sub> (19 g, 300.00 mmol, 1.33 equiv.) in water (300 mL). The resulting solution was stirred for 30 min at 20-25 °C and concentrated under vacuum. The residue was diluted with 500 mL of H<sub>2</sub>O and the product was extracted in dichloromethane (2x300 mL). the organic layers were combined, dried over anhydrous sodium sulfate and concentrated under vacuum. The residue was applied onto a silica gel column and eluted with ethyl acetate/petroleum ether (1:30). This resulted in 100 g (91%) of the title compound as a colorless oil.

**(2R,5R)-5-[[*tert*-Butyldiphenylsilyl]oxy]methyl]-8,8-dimethyl-7,9-dioxatricyclo[4.3.0.0<sup>^</sup>[2,4]]nonan-2-amine (**24**).** Into a 5-L 4-necked round-bottom flask purged and maintained with an inert atmosphere of nitrogen, was placed **23** (100 g, 203.40

mmol, 1.00 equiv.) and benzene (2.5 L). The resulting mixture was stirred at 80 °C for 5 h. Then the mixture was concentrated under vacuum. The residue was dissolved in oxolane (5 L) and poured in a 5-L 4-necked round-bottom flask containing a solution of NaOH (160 g, 4.00 mol, 1.00 equiv.) in water (2 L) with vigorous stirring. After stirred for 30 min at room temperature, the volatiles were removed under vacuum. The residue was diluted with 3 L of ethyl acetate and the organic phase was washed with 2x2 L of brine, dried over anhydrous sodium sulfate and concentrated under vacuum. The residue was applied onto a silica gel column and the products eluted with ethyl acetate/petroleum ether (1:8→1:3). This resulted in 66 g (74%) of the title compound **24** as a brown oil.

**Scheme S2:** An alternate route to intermediate **51**.

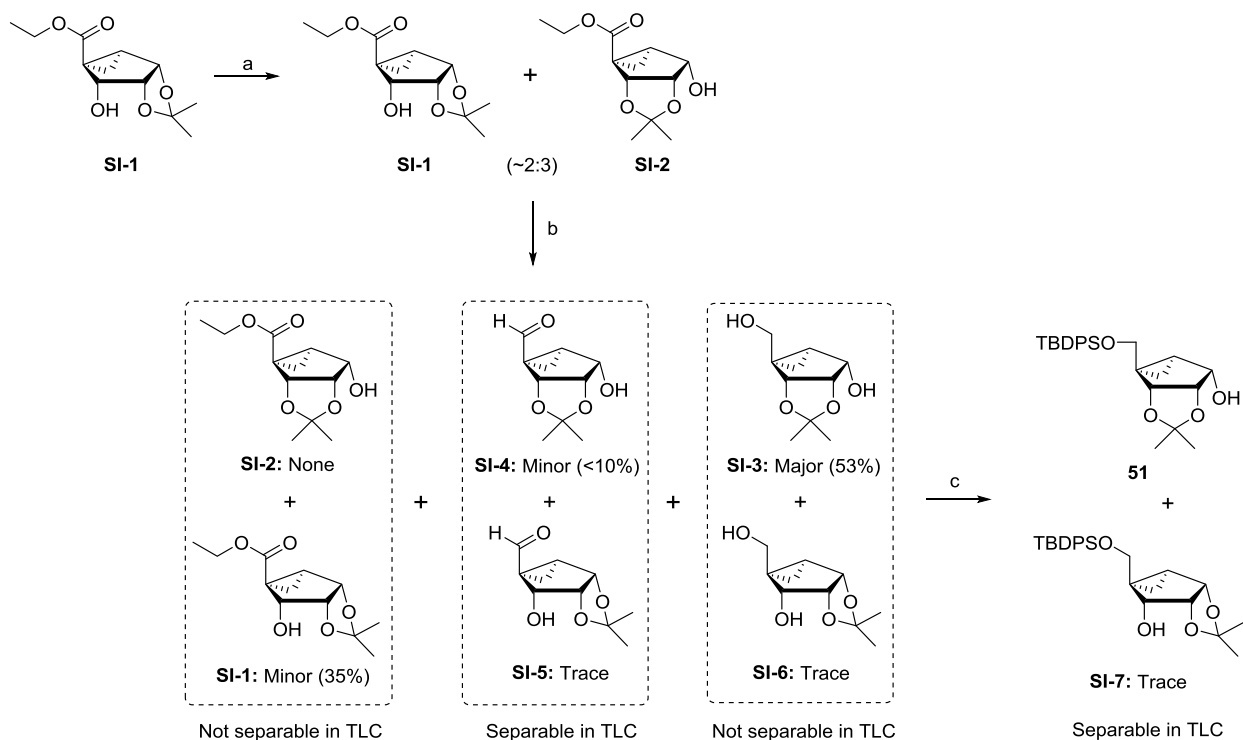

**Reagents and Conditions:** (a) anhydrous  $\text{CH}_2\text{Cl}_2$ ,  $\text{CF}_3\text{SO}_3\text{H}$ , rt, 5h, quantitative; (b) anhydrous THF, DIBAL-H,  $-78\text{ }^\circ\text{C}$ , 3h, 53%; (c) anhydrous  $\text{CH}_2\text{Cl}_2$ , DMAP, imidazole, TBDPS-Cl, rt, 18h, 60%.

The compound mixture **SI-1,2** was synthesized following the reported protocol.<sup>[3]</sup>

(3aR,3bR,4aS,5S,5aS)-3b-(hydroxymethyl)-2,2-dimethylhexahydrocyclopropa[3,4]cyclopenta[1,2-d][1,3]dioxol-5-ol (**SI-3**): The mixture of compounds **SI-1** and **SI-2** (25 mg, 0.103 mmol) was dried by chasing with anhydrous toluene (2x2mL) and desolved in anhydrous THF (1 mL). DIBAL-H (1M in toluene, 0.83 mL, 0.825 mmol) was added drop wise at  $-78\text{ }^\circ\text{C}$  and stirred at this temperature for 3h. The reaction was

quenched by adding saturated Rochelle salt solution (2 mL) and stirred at rt for 30 min. Products were extracted in 10% isopropyl alcohol in chloroform (10x10 mL), combined, dried over anhydrous Na<sub>2</sub>SO<sub>4</sub>, evaporated and the residue purified by silica-gel flash chromatography to afford **SI-1** (9 mg, 35%, R<sub>f</sub>-0.8); **SI-4** (3 mg, 9%, R<sub>f</sub>-0.65); **SI-5** (~1 mg as a mixture with SI-4, R<sub>f</sub>-0.60); **SI-3** (11 mg, 53%, R<sub>f</sub>-0.2); TLC eluent = ethyl acetate. Data for **SI-3**: <sup>1</sup>H NMR (400 MHz, CDCl<sub>3</sub>) δ 4.93 (dt, *J* = 1.2, 6.5 Hz, 1H), 4.62 – 4.47 (m, 2H), 3.68 (d, *J* = 11.5 Hz, 1H), 3.50 (d, *J* = 11.5 Hz, 1H), 2.34 (s, 2H), 1.78 (dtd, *J* = 1.2, 4.7, 9.2 Hz, 1H), 1.53 (s, 3H), 1.28 (s, 3H), 1.18 (t, *J* = 4.9 Hz, 1H), 0.65 (ddt, *J* = 1.1, 5.3, 8.9 Hz, 1H).

(3aR,3bR,4aS,5S,5aS)-3b-(((tert-butylidiphenylsilyl)oxy)methyl)-2,2-dimethylhexahydrocyclopropa[3,4]cyclopenta[1,2-d][1,3]dioxol-5-ol (**51**): Compound **SI-3** (37 mg, 0.185 mmol) was dissolved in anhydrous CH<sub>2</sub>Cl<sub>2</sub> (1 mL). To this was added Imidazole (25 mg, 0.37 mmol), DMAP (5 mg, 0.037 mmol) and TBDPS-Cl (48 μL, 0.185 mmol) sequentially, and stirred at rt for 18h. Solvent was evaporated under reduced pressure and the residue purified by silica-gel flash column chromatography to afford desired product **51** as a white foam (50 mg, 60%, R<sub>f</sub>-0.3; TLC eluent = 20% ethyl acetate in hexanes). <sup>1</sup>H NMR (400 MHz, CDCl<sub>3</sub>) δ 7.69 – 7.60 (m, 4H), 7.47 – 7.34 (m, 6H), 5.01 (dd, *J* = 1.2, 6.9 Hz, 1H), 4.55 (td, *J* = 0.8, 6.9 Hz, 1H), 4.50 – 4.43 (m, 1H), 4.08 (d, *J* = 11.0 Hz, 1H), 3.29 (d, *J* = 11.0 Hz, 1H), 2.19 (s, 1H), 1.65 – 1.58 (m, 1H), 1.54 (s, 3H), 1.31 (s, 3H), 1.09 (t, *J* = 4.9 Hz, 1H), 1.06 (s, 9H), 0.54 (ddt, *J* = 1.2, 5.2, 8.8 Hz, 1H).

## References:

1. Joshi, B.V.; Melman, A.; Mackman, R.L.; Jacobson, K.A. Synthesis of ethyl (1*S*,2*R*,3*S*,4*S*,5*S*)-2,3-*O*-(isopropylidene)-4-hydroxy-bicyclo[3.1.0]hexane-carboxylate from L-ribose: A versatile chiral synthon for preparation of adenosine and P2 receptor ligands. *Nucleos. Nucleot. Nucleic Acids* **2008**, *27*, 279-291.
2. Melman, A.; Zhong, M.; Marquez, V.E.; Jacobson, K.A. Synthesis of enantiomerically pure (*S*)-methanocarbaribo uracil nucleoside derivatives for use as antiviral agents and P2Y receptor ligands. *J. Org. Chem.* **2008**, *73*, 8085-8088.
3. Santhosh Kumar, T.; Zhou, S-Y.; Joshi, B. V.; Balasubramanian, R.; Yang, T.; Liang, B. T.; Jacobson, K. A. Structure–Activity Relationship of (*N*)-Methanocarba Phosphonate Analogues of 5'-AMP as Cardioprotective Agents Acting Through a Cardiac P2X Receptor. *J. Med. Chem.* **2010**, *53*, 2562-2576.



08-Dec-2015

Figure S1a: Assay mix with 1.0  $\mu$ M 30 and inosine

kst-08dec15-mrs4200-ph7-lc Sb (15,0.10)

LC trace for compound 30

+ve/-ve ion mode: TOF MS ES+  
ion mass: 403 0.20Da  
ion count/ intensity: 4.97e4

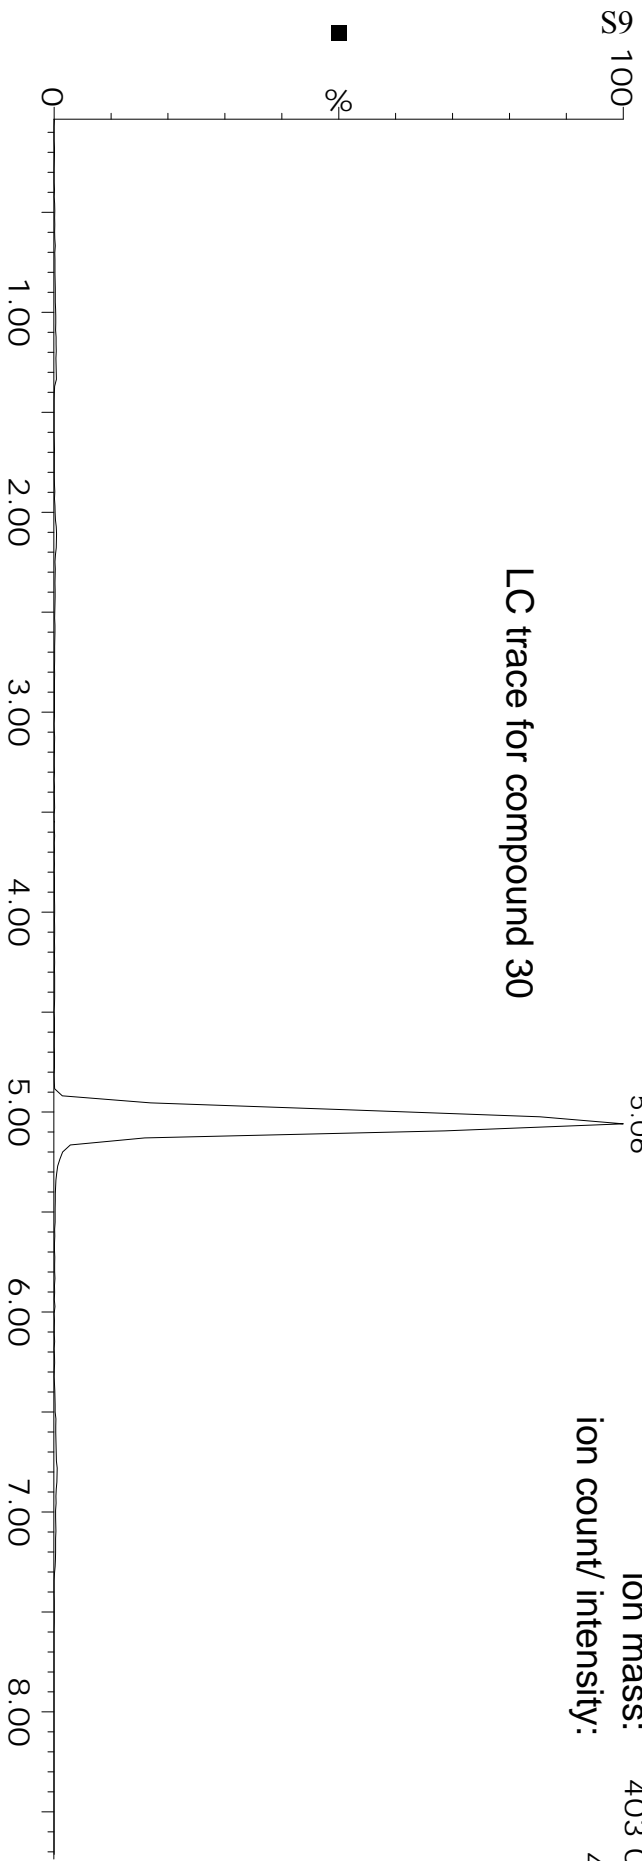

kst-08dec15-mrs4200-ph7-lc Sb (15,0.10)

TOF MS ES+

BPI

9.07e3

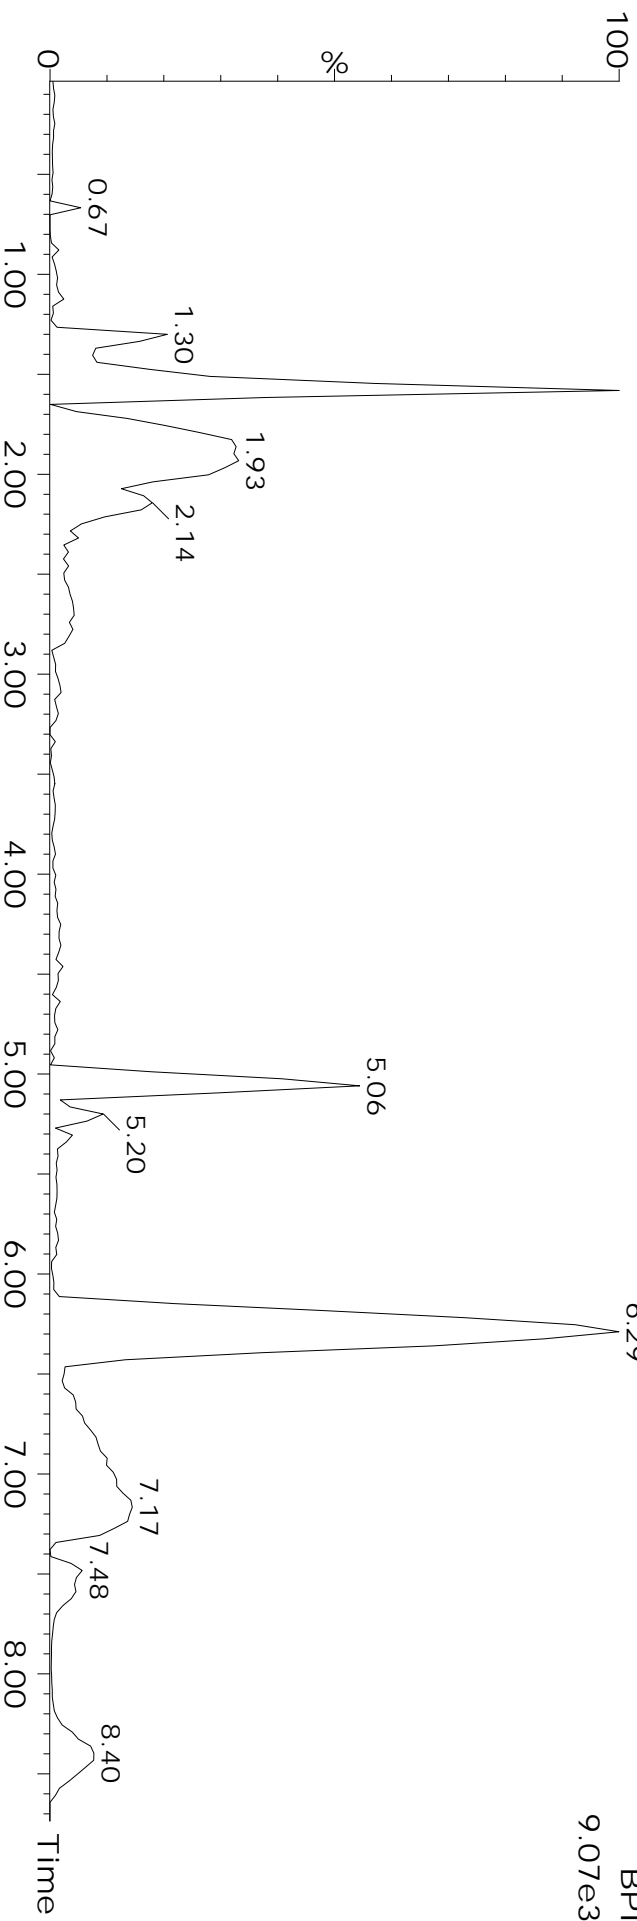

08-Dec-2015

kst-08dec15-mrs4200-ph7-1c

### LC trace for compound 30-MP

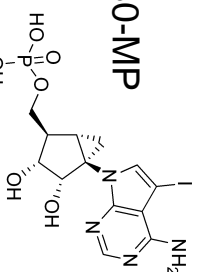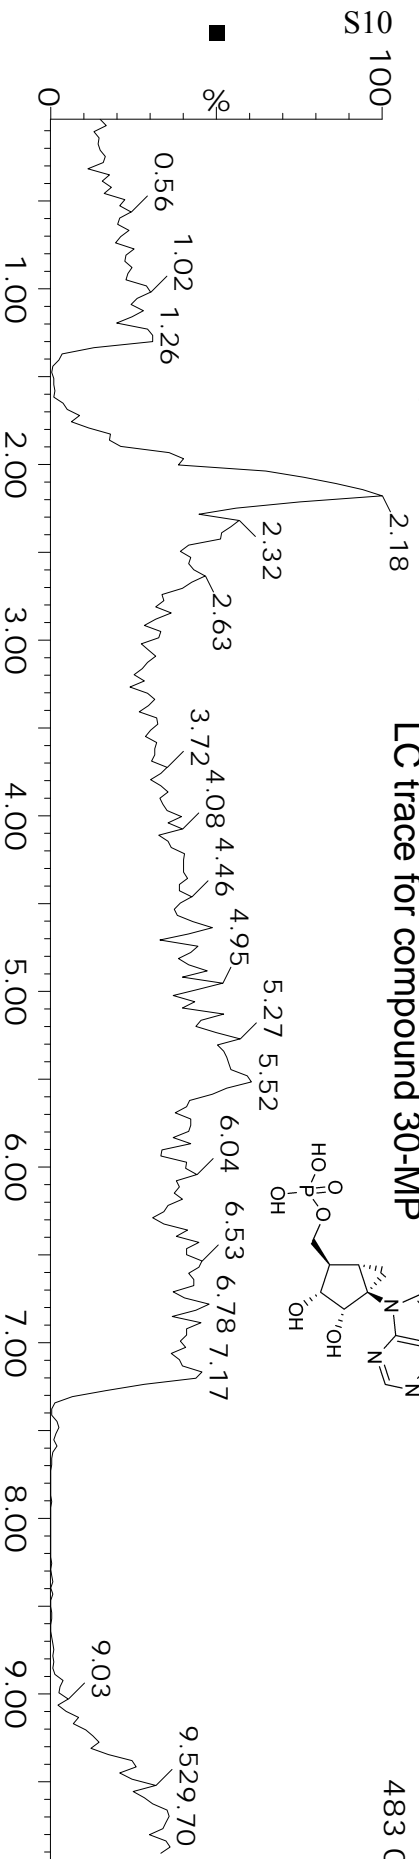

kst-08dec15-mrs4200-ph7-1c Sb (15,0.10)

### LC trace for compound XMP

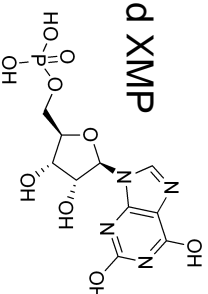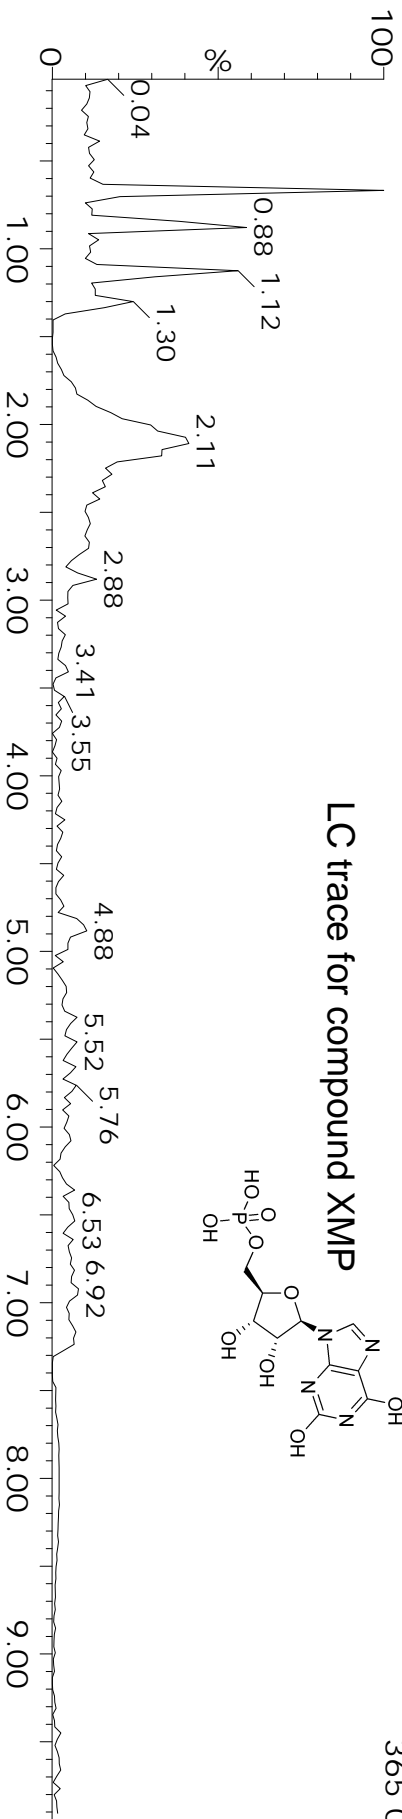

kst-08dec15-mrs4200-ph7-1c

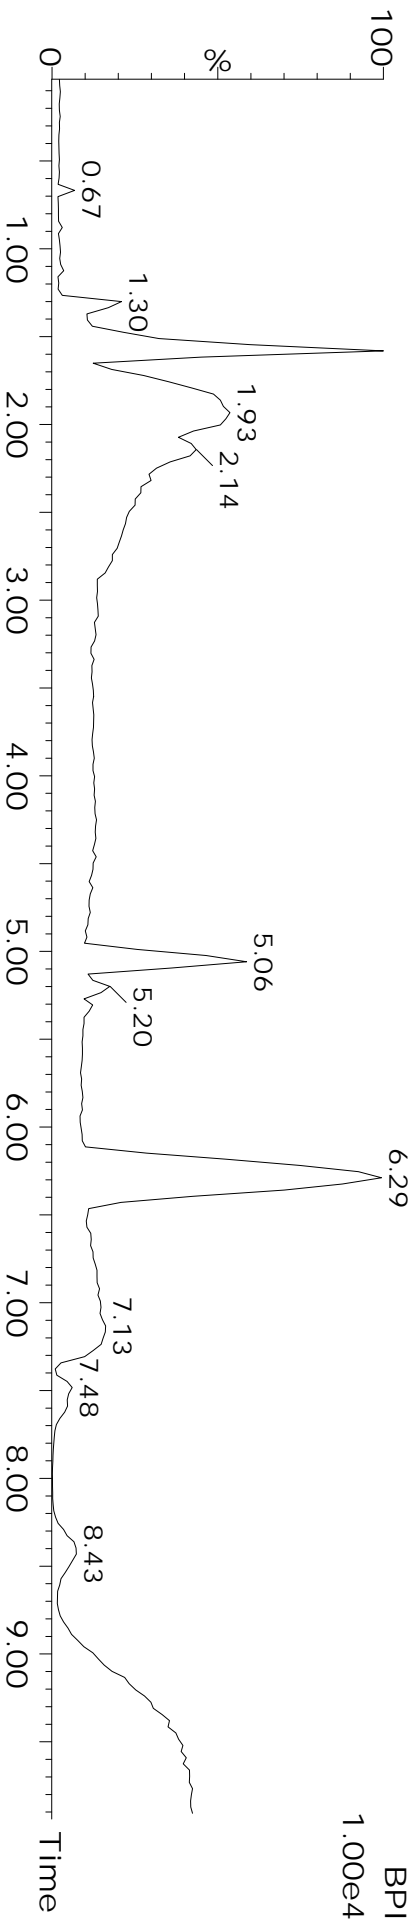

08-Dec-2015

kst-08dec15-mrs4200+mmrb-01

LC trace for compound 30-MP (-ve mode)

TOF MS ES- 482.0.10Da 13

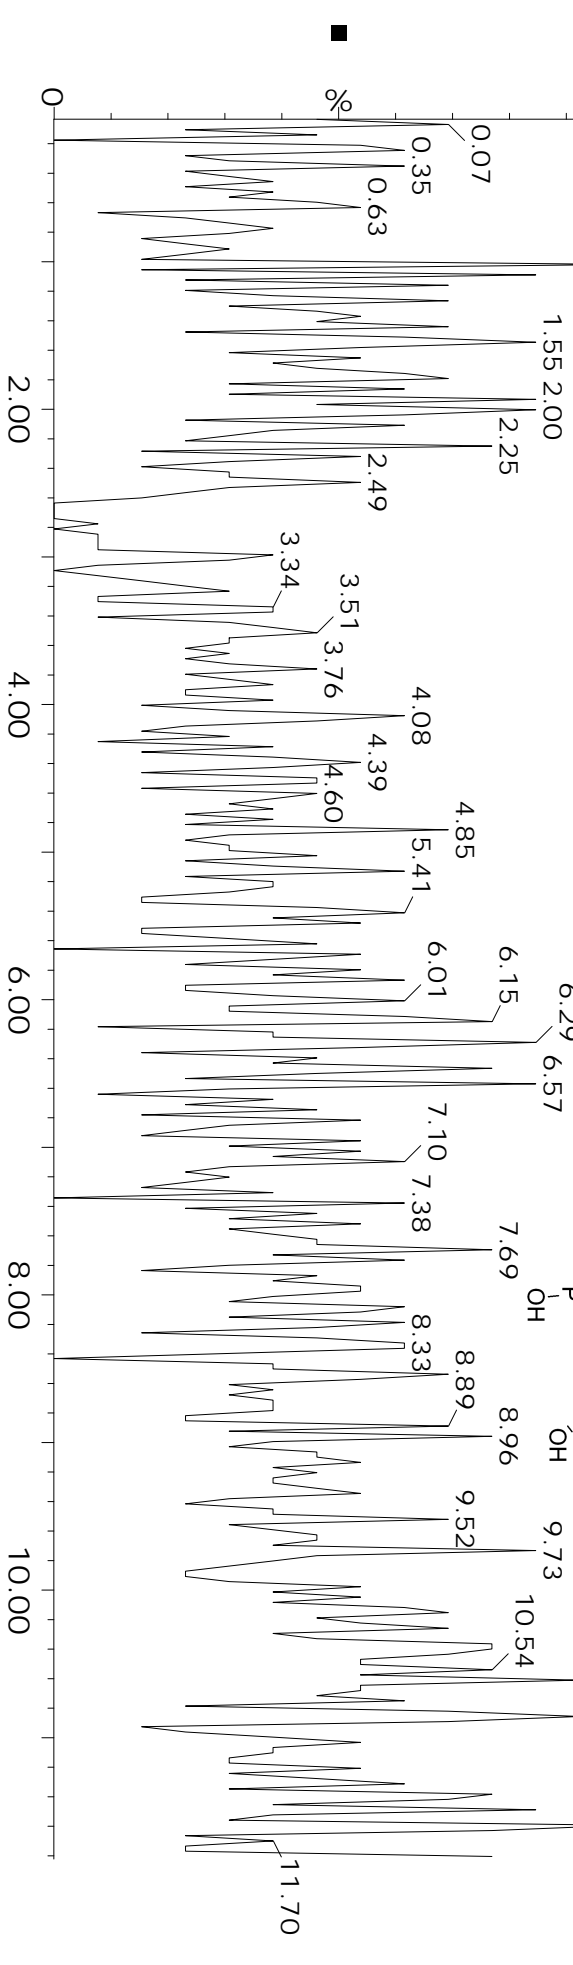

kst-08dec15-mrs4200+mmrb-01

TOF MS ES-

BPI

1.24e4

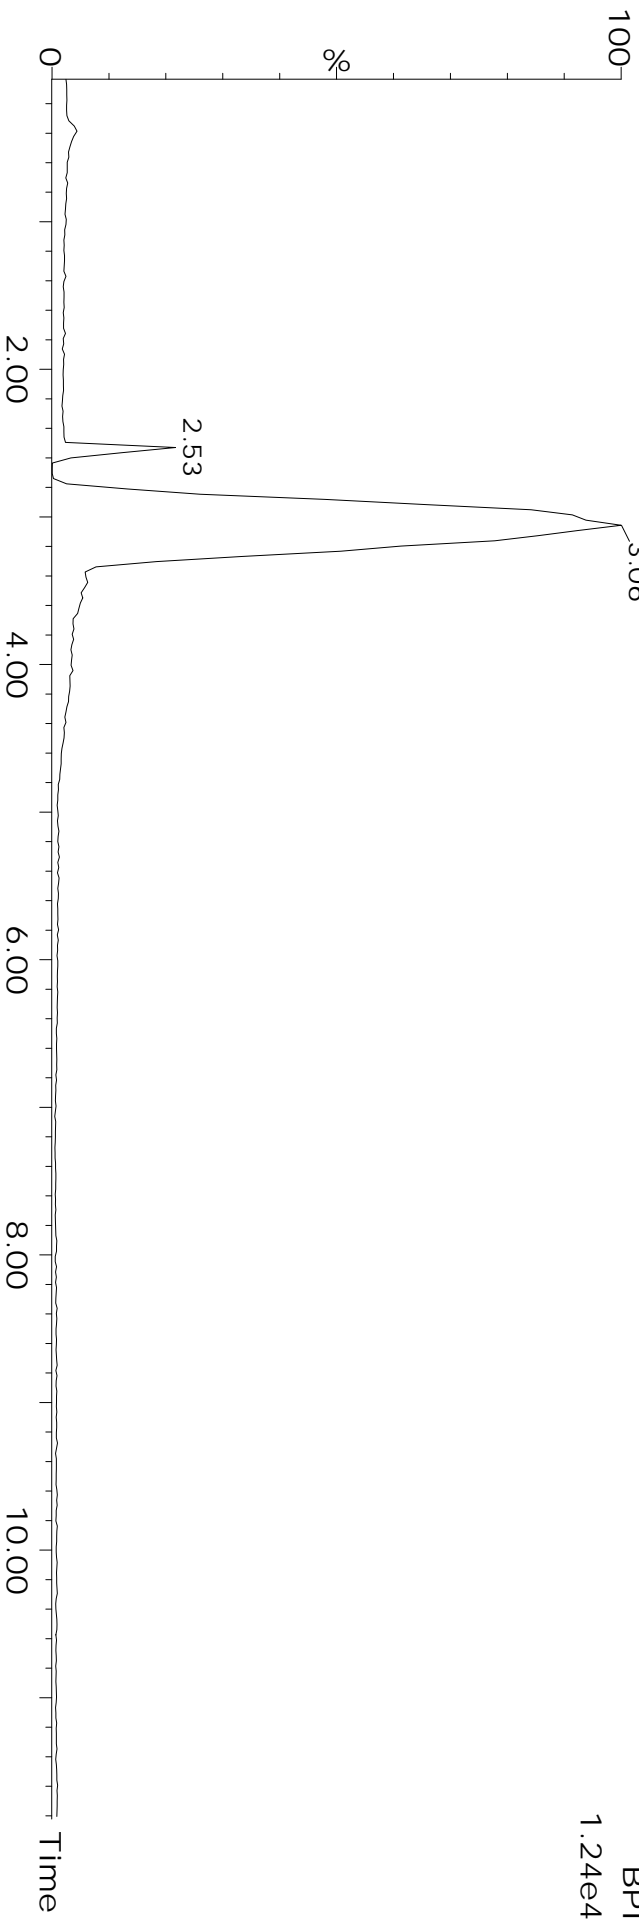

15-Dec-2015

Figure S1b: Assay mix with inosine and without 30

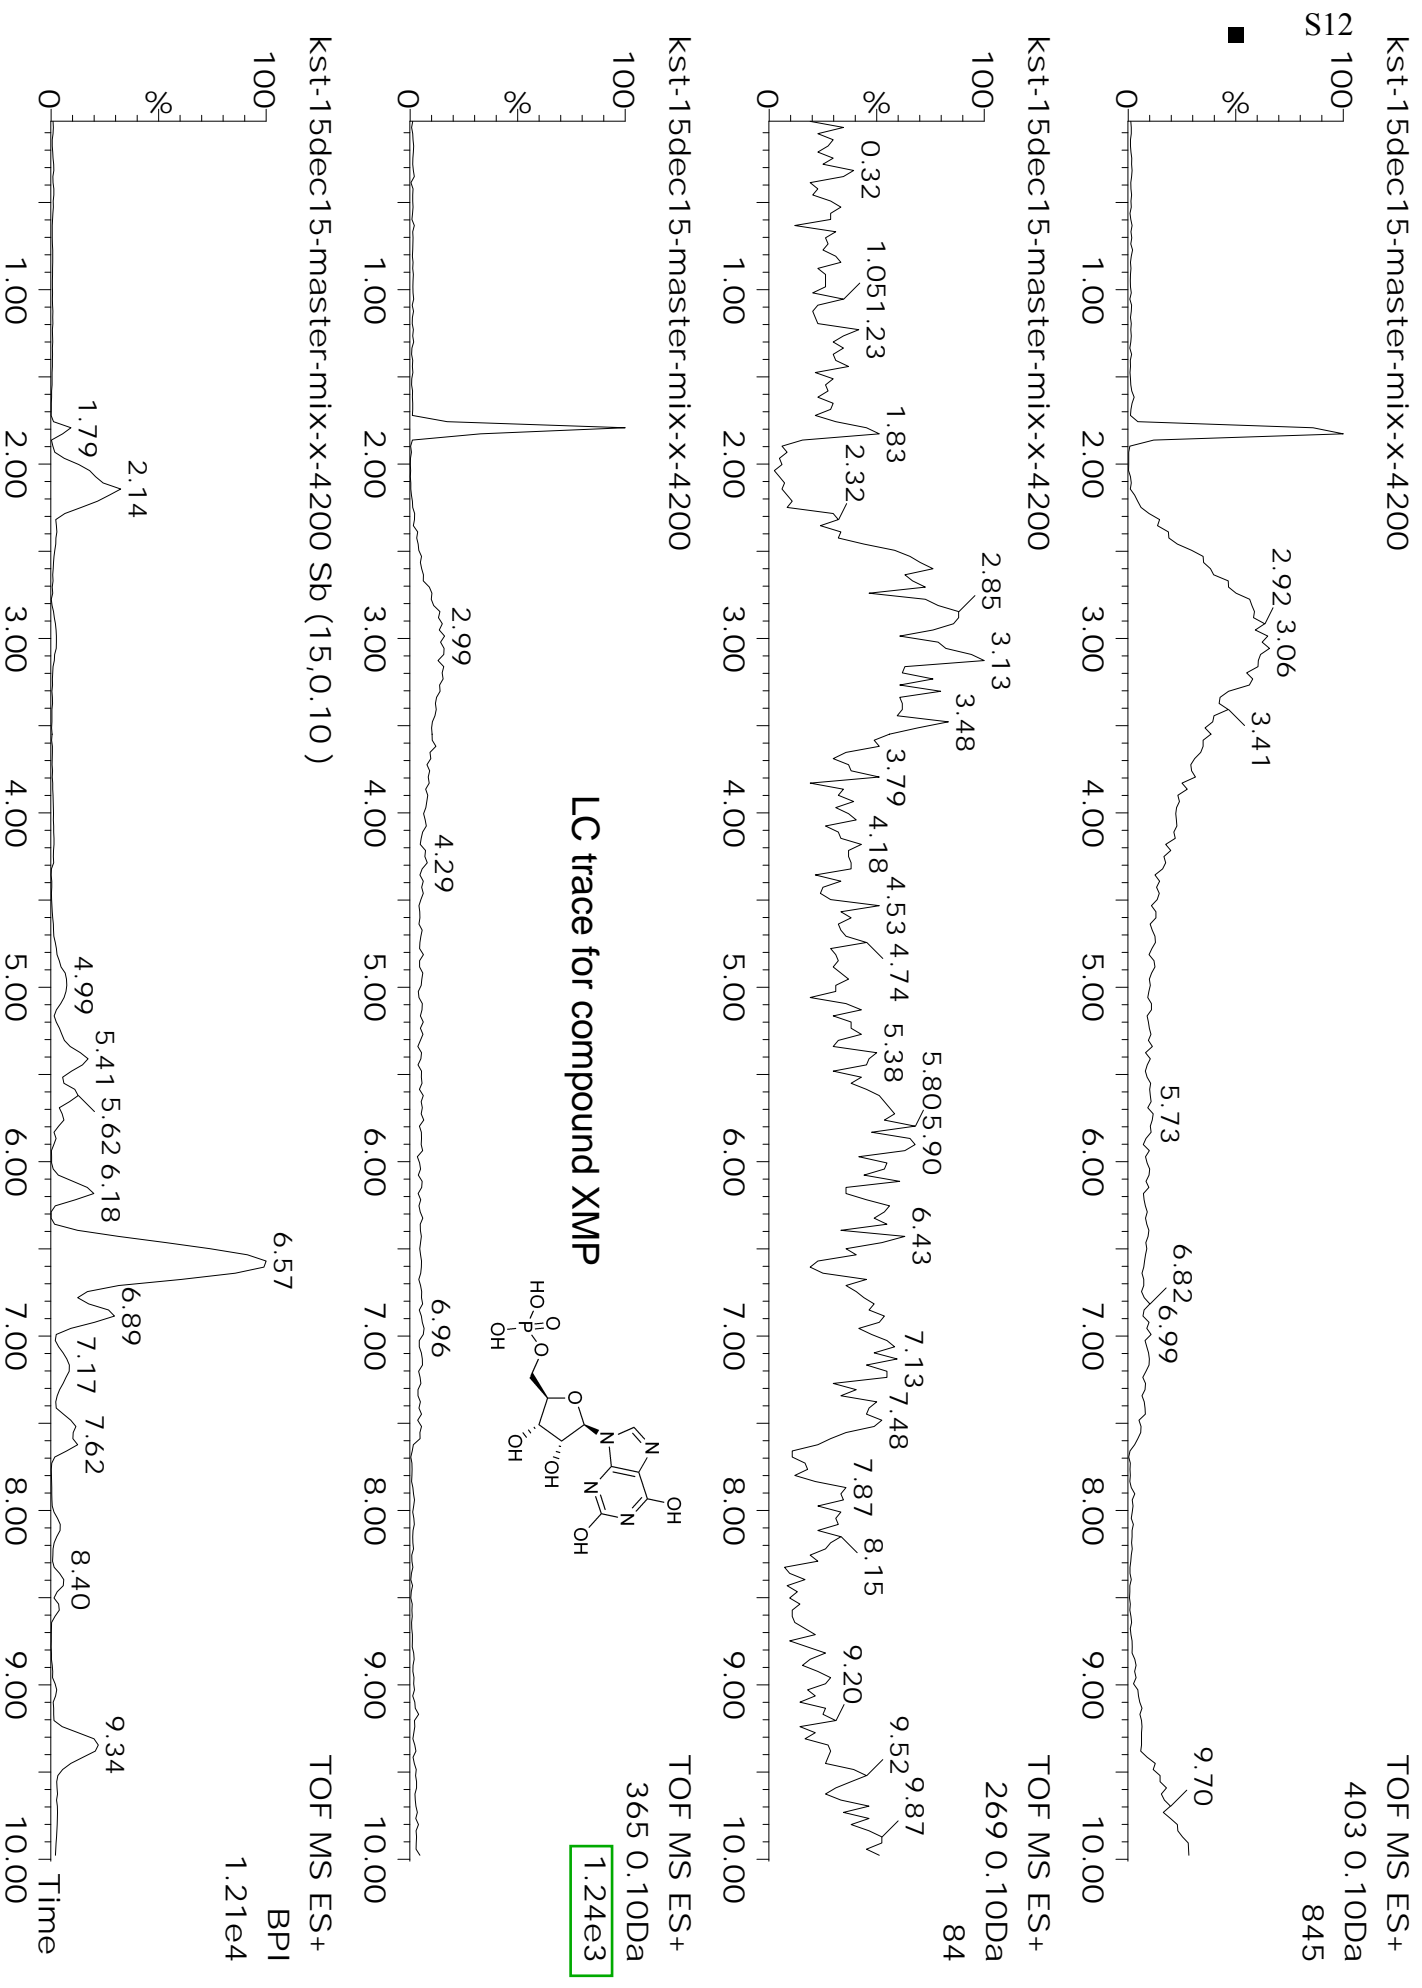

22-Dec-2015

Figure S1c: Assay mix with 1.0 uM 30 without inosine

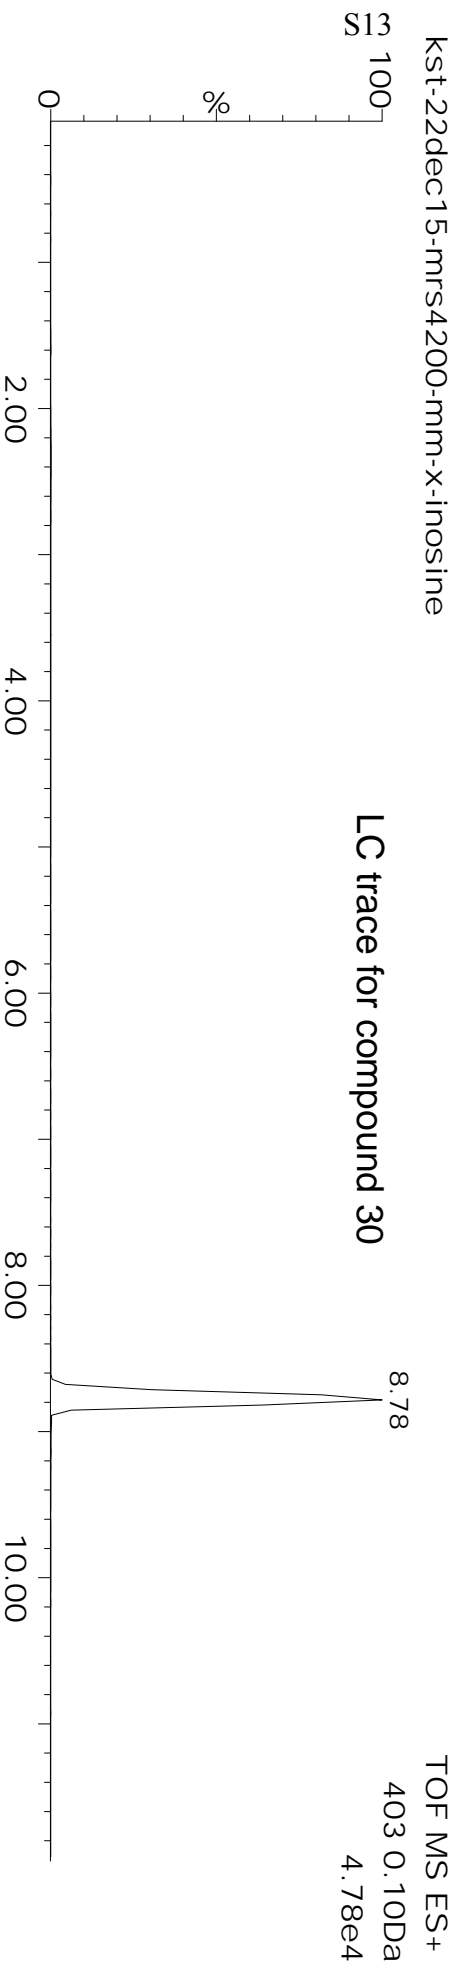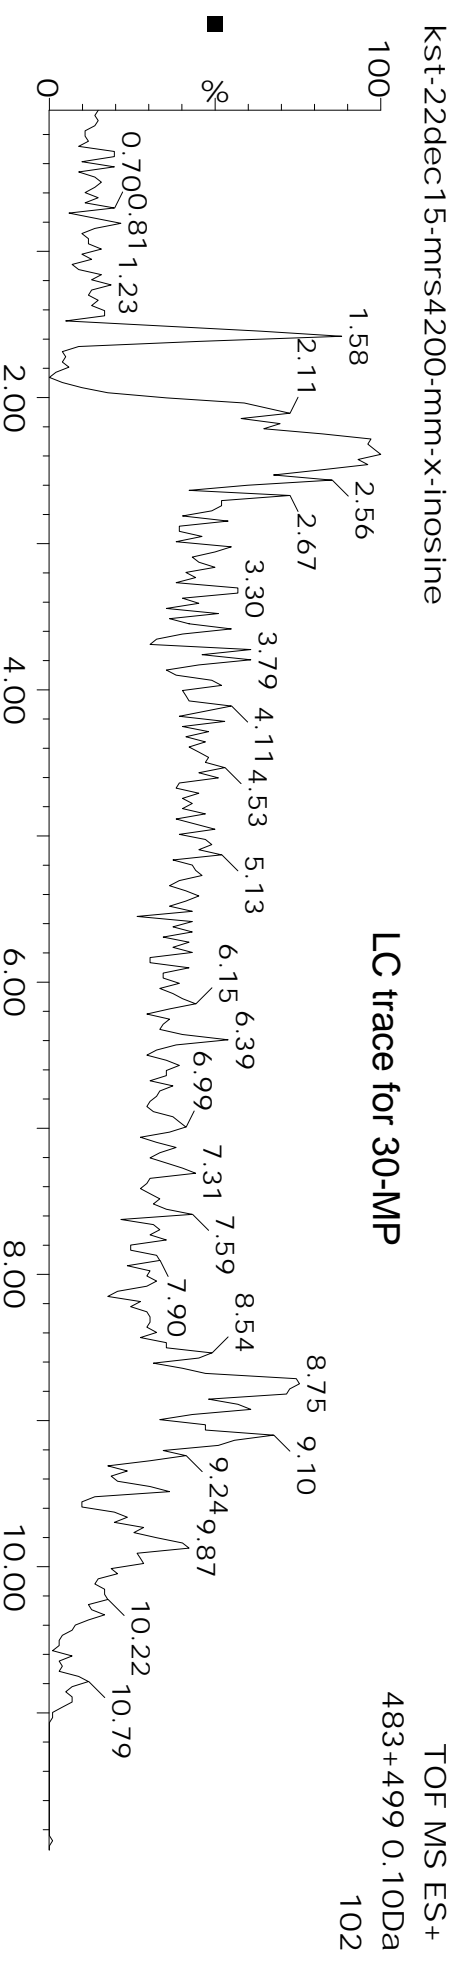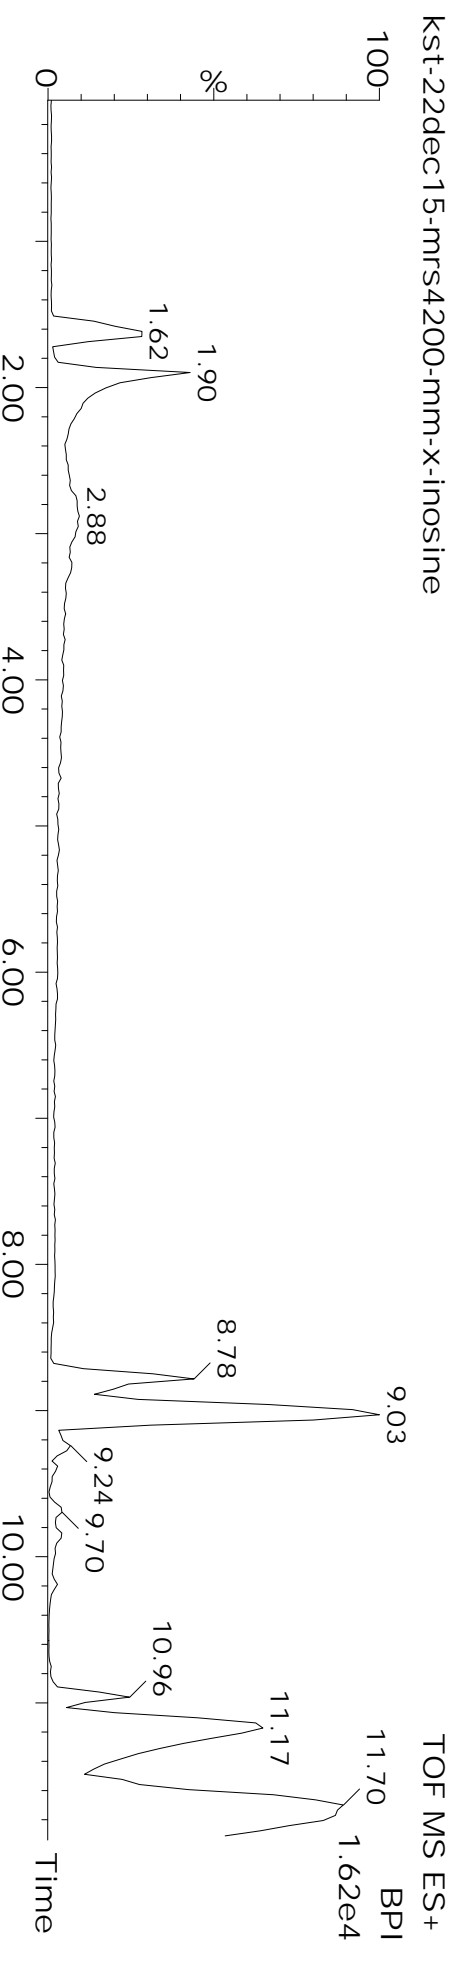

**Table S1.** Parameters considered for the selection of a representative trajectory among three replicas: protein alpha carbon atoms ( $C\alpha$ ) average RMSD, ligand average RMSD/RMSF, and slope of the dynamic scoring function. RMSD and RMSF values are in Å and the  $wDSF_{tot}$  is adimensional.

|                      | <b>1c</b>      |         |        | <b>30</b> |                |         | <b>57</b> |          |                |
|----------------------|----------------|---------|--------|-----------|----------------|---------|-----------|----------|----------------|
|                      | RUN1           | RUN2    | RUN3   | RUN1      | RUN2           | RUN3    | RUN1      | RUN2     | RUN3           |
| $C\alpha$ RMSD       | 1.90           | 2.01    | 2.81   | 3.95      | 2.37           | 2.21    | 3.78      | 2.19     | 1.74           |
| Ligand RMSD          | 0.95           | 1.07    | 1.24   | 1.97      | 0.88           | 1.00    | 1.35      | 0.99     | 0.81           |
| Ligand RMSF          | 0.52           | 0.79    | 0.58   | 1.02      | 0.61           | 0.68    | 0.94      | 0.75     | 0.55           |
| $wDSF_{tot}$ (slope) | <b>-119.36</b> | -112.52 | -88.37 | -71.13    | <b>-162.32</b> | -125.98 | -102.01   | -131.258 | <b>-154.16</b> |

  

|                      | <b>34</b>     |        |        | <b>55</b> |               |        | <b>1a</b> |                |         |
|----------------------|---------------|--------|--------|-----------|---------------|--------|-----------|----------------|---------|
|                      | RUN1          | RUN2   | RUN3   | RUN1      | RUN2          | RUN3   | RUN1      | RUN2           | RUN3    |
| $C\alpha$ RMSD       | 2.31          | 1.98   | 3.86   | 1.98      | 1.77          | 2.70   | 4.21      | 2.36           | 3.16    |
| Ligand RMSD          | 1.36          | 1.63   | 2.22   | 1.31      | 1.13          | 1.50   | 1.65      | 0.93           | 1.18    |
| Ligand RMSF          | 0.68          | 0.81   | 0.97   | 0.85      | 0.68          | 0.93   | 0.87      | 0.89           | 0.75    |
| $wDSF_{tot}$ (slope) | <b>-69.98</b> | -61.36 | -42.49 | -74.76    | <b>-88.98</b> | -76.00 | -83.61    | <b>-163.90</b> | -117.76 |

**Figure S2.** Upper panel: IE profile obtained during 60 ns of MD simulations of the hAK in complex with **1c** starting from the X-Ray structure. The electrostatic (IE<sub>e</sub>) and van der Waal (IE<sub>v</sub>) contributions and the total IE (IE<sub>t</sub>) are represented as blue, green and pink lines, respectively. IE values are in Kcal/mol. Lower panel: selected representative ligand conformations adopted during the MD simulation: *i*) C1'-exo, *ii*) C2'-endo, and *iii*) C3'-endo conformations.

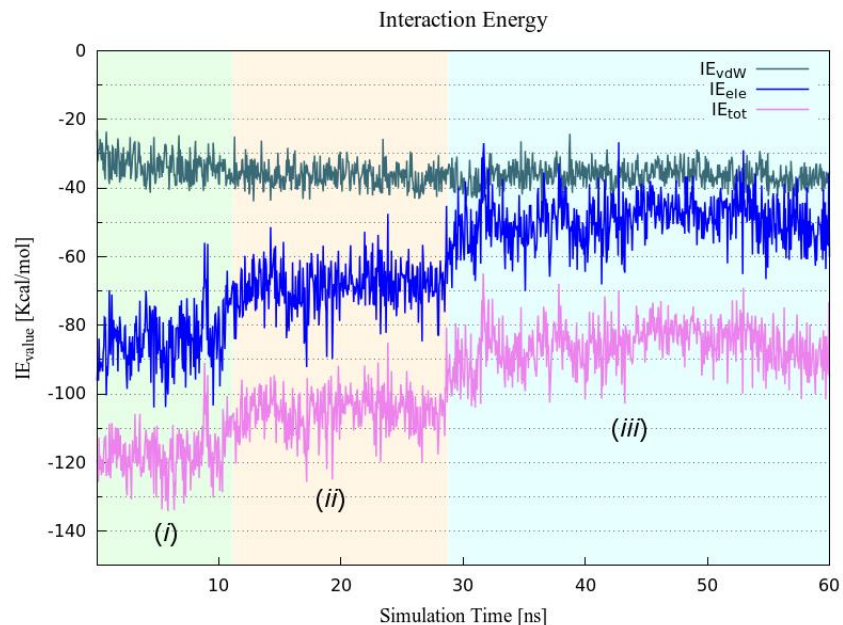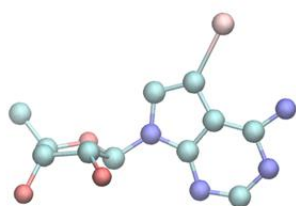

(i)

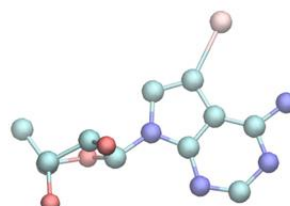

(ii)

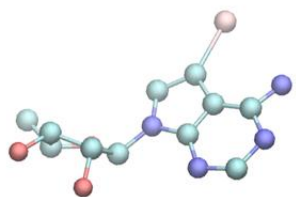

(iii)

**Figure S3.** IE profiles during 30 ns of MD simulations of the hAdK in complex with **34** and **55** starting from the docking poses. The electrostatic ( $IE_{ele}$ ) and van der Waals ( $IE_{vdw}$ ) contributions and the total IE ( $IE_{tot}$ ) are represented as blue, green and pink lines, respectively. IE values are in Kcal/mol.

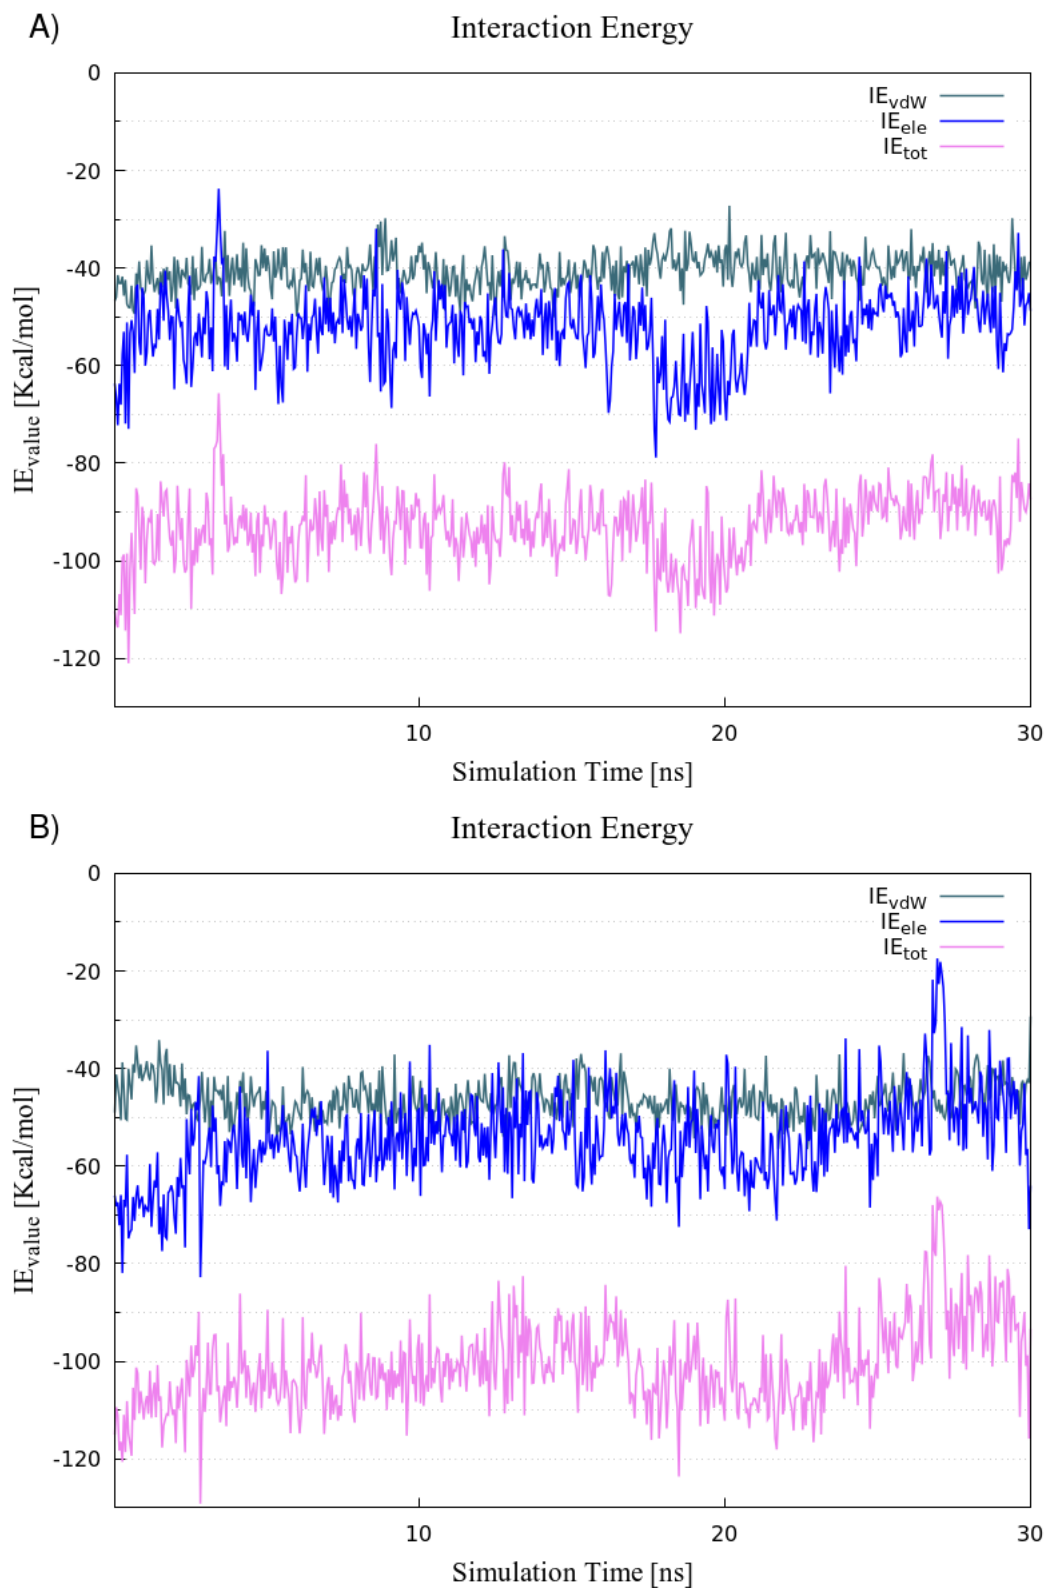



**Figure S4.** Panel A: Superimposition between X-Ray protein structures of the hAK in the closed (PDB ID: 2I6A, gray ribbons) and open conformation (PDB ID: 2I6B, light green ribbons). Panels B-F: superimposition of MD average protein structures obtained after 30 ns of MD simulation of hAK in complex with **1c** (B, pink ribbons), **30** (C, yellow ribbons), **57** (D, green ribbons), **34** (E, cyan ribbons), and **55** (F, orange ribbons) with the starting X-Ray protein structure in the closed conformation (PDB ID: 2I6A, gray ribbons).

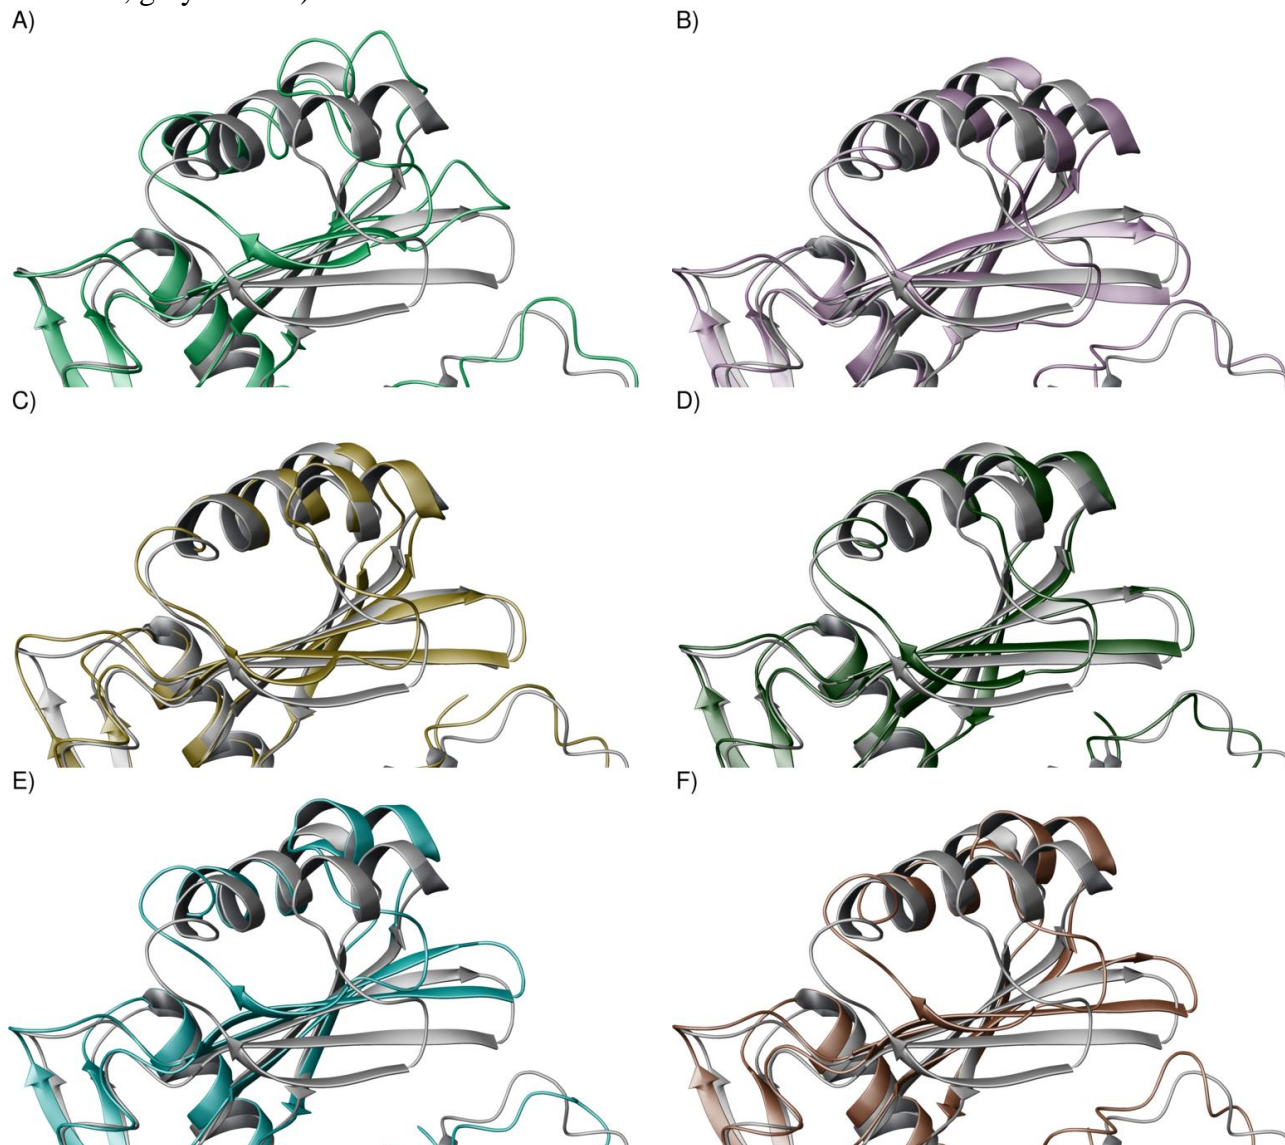

**Figure S5.** Panel A: Docking pose of **1a** in complex with the closed form of hAK (PDB ID: 2I6A) obtained after IFD. Ligand and side chains of residues important for ligand recognition are reported as line and sticks, respectively. H-bonds are pictured as yellow dashed lines, whereas  $\pi$ - $\pi$  stacking interactions as blue dashed lines with the centroids of the aromatic rings displayed as cyan spheres. Nonpolar hydrogen atoms are omitted. Panel B: superimposition of the MD average protein structure obtained after 30 ns of MD simulation of hAK in complex with **1a** (magenta ribbons) with the starting X-Ray protein structure in the closed conformation (PDB ID: 2I6A, gray ribbons).

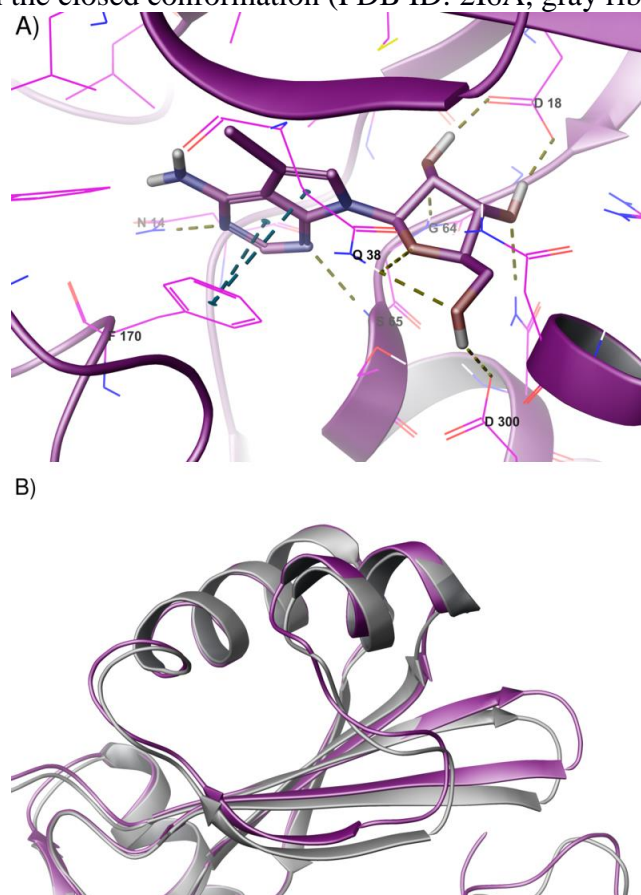

**Figure S6.** Endocyclic torsion  $\nu_0$ - $\nu_4$  angles used to compute the sugar pseudorotation phase angle (P).

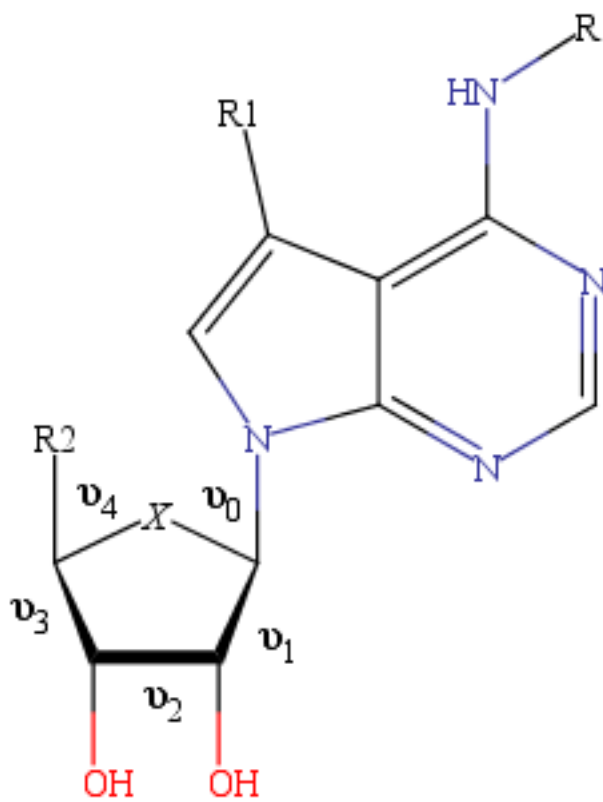

**Figure S7. Off-target activities**

$K_i$  determinations and binding profiles in a broad screen of receptors and channels were generously provided by the National Institute of Mental Health's Psychoactive Drug Screening Program, Contract # HHSN-271-2008-00025-C (NIMH PDSP). The NIMH PDSP is Directed by Bryan L. Roth MD, PhD at the University of North Carolina at Chapel Hill and Project Officer Jamie Driscoll at NIMH, Bethesda MD, USA. For experimental details please refer to the PDSP web site <http://pdsp.med.unc.edu/> and click on "Binding Assay" or "Functional Assay" on the menu bar.

Radioligand binding inhibition by compound **38a** (MRS4203) at the 5HT<sub>7</sub>R:

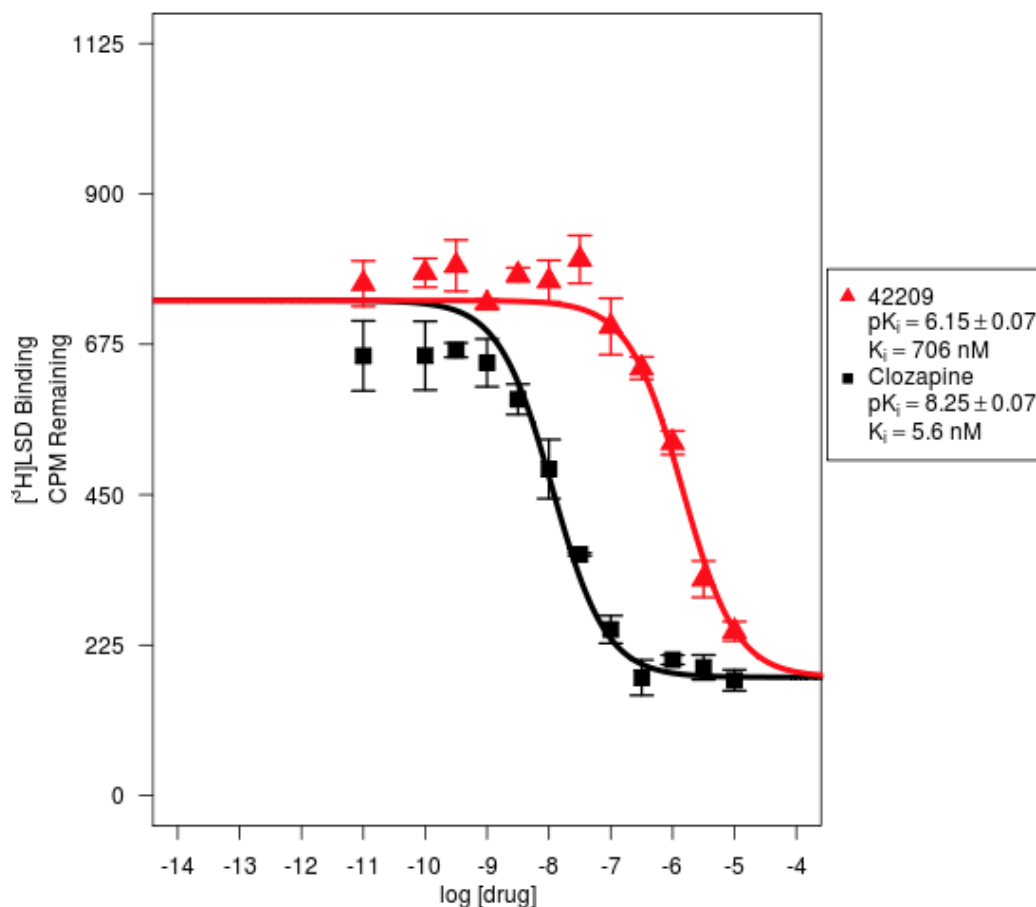

Radioligand binding inhibition by compound **55** (MRS4380) at the 5HT<sub>2B</sub>R:

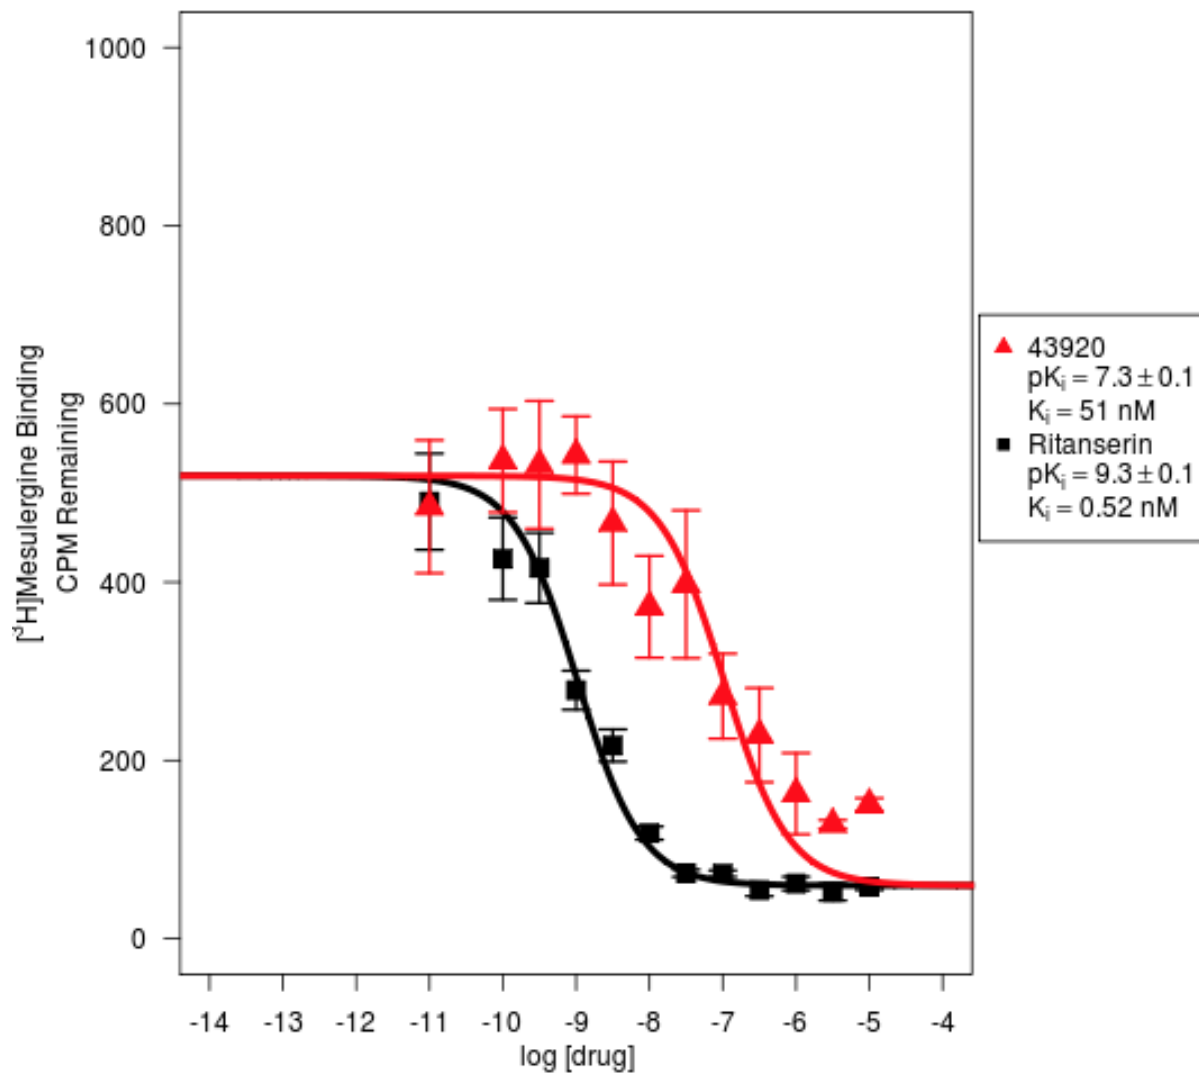

H NMR: Compound 28

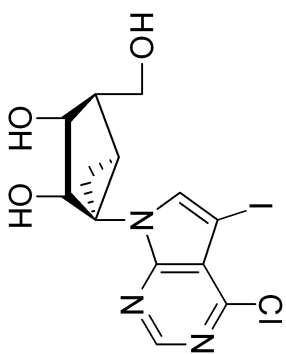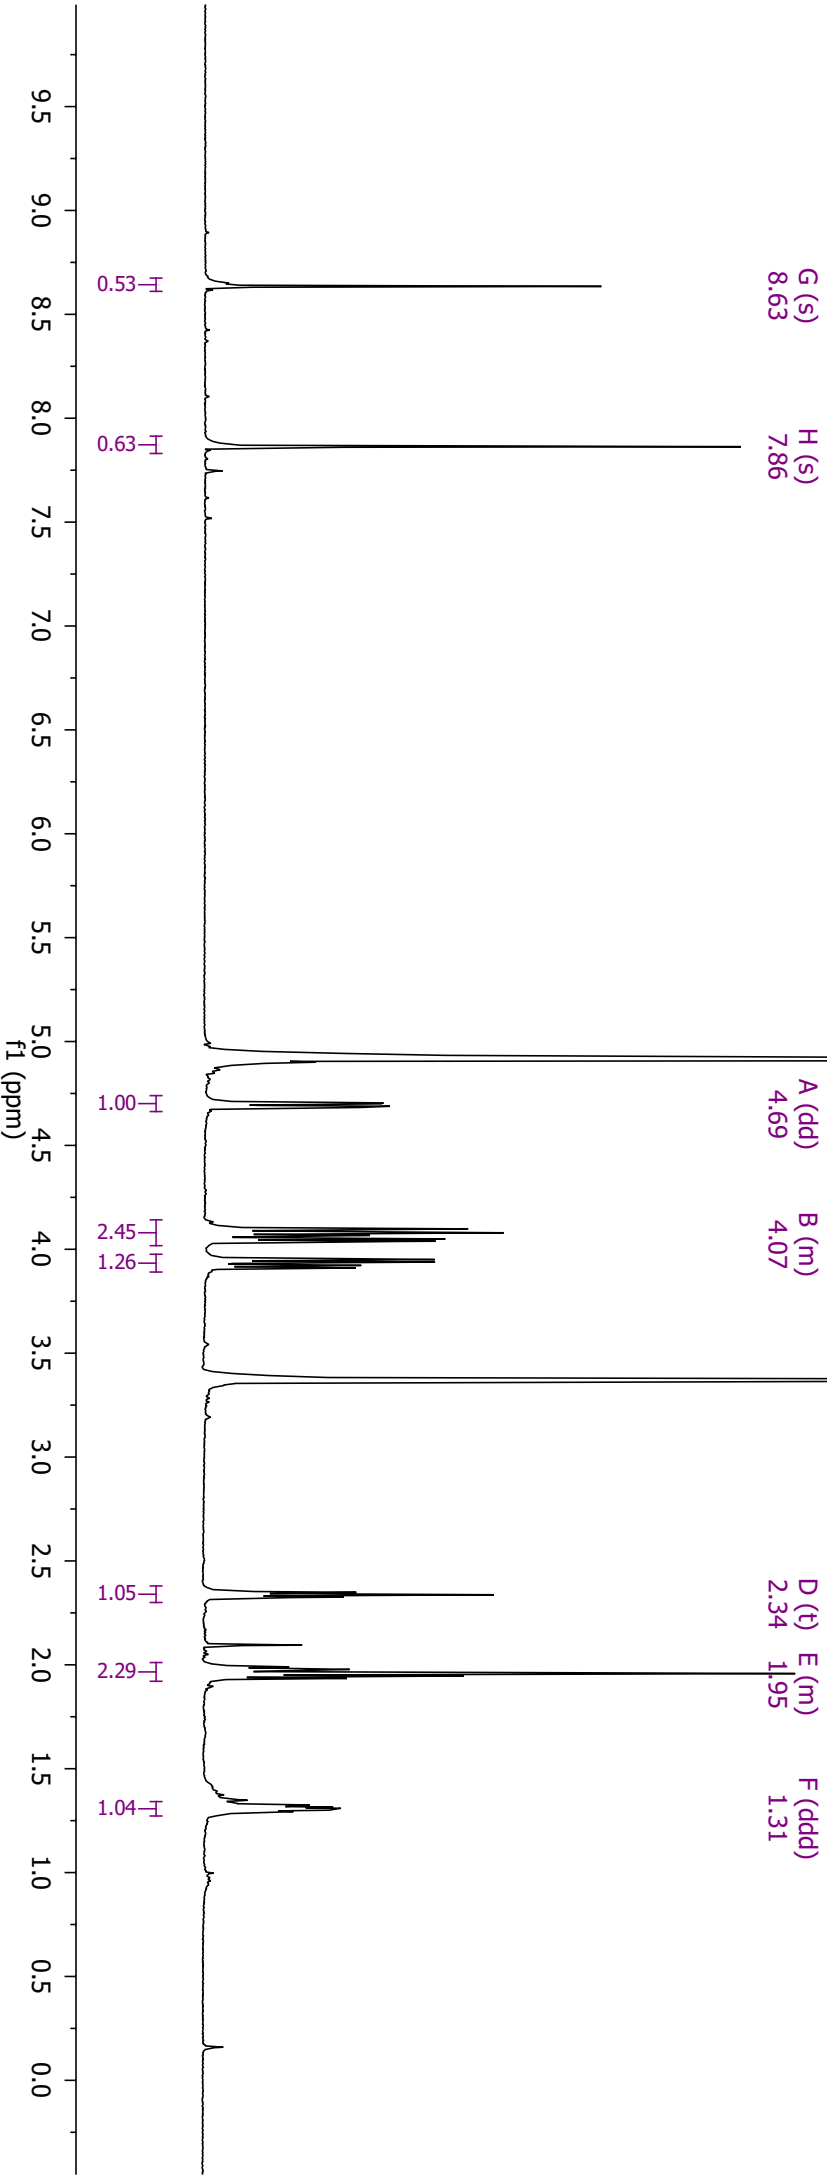

C NMR: Compound 28

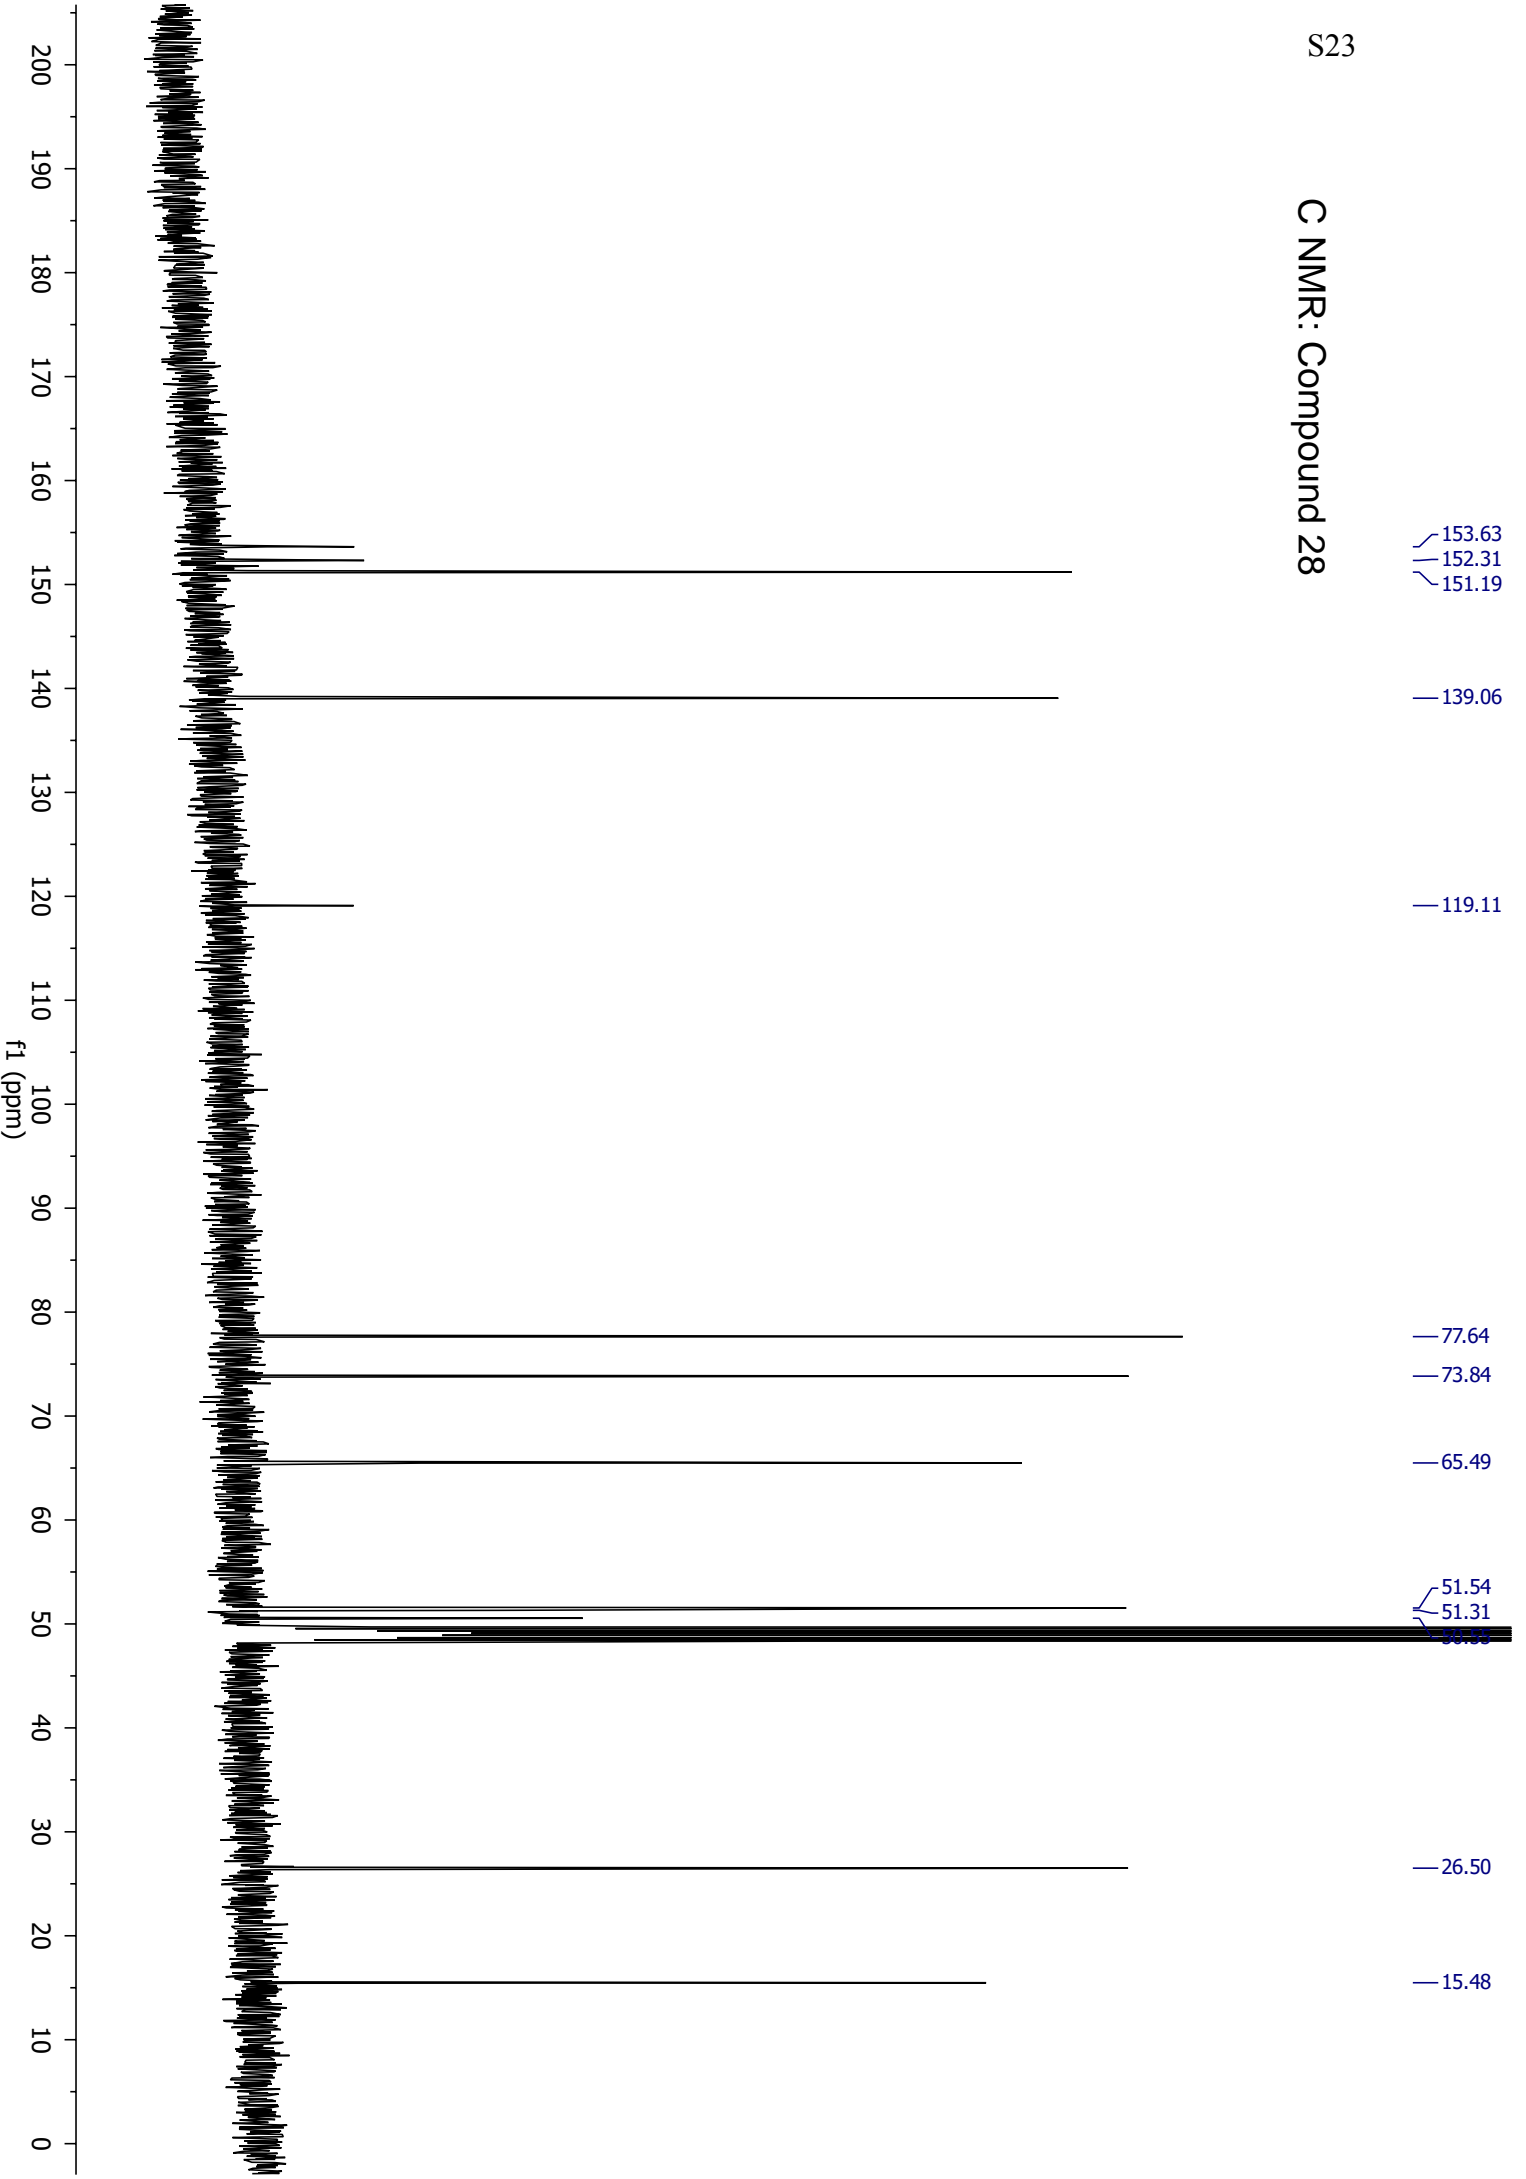

Single Mass Analysis

Tolerance = 25.0 mDa / DBE: min = -50.0, max = 500.0

Element prediction: Off

Number of isotope peaks used for i-FIT = 3

Monoisotopic Mass, Even Electron Ions

106 formula(e) evaluated with 7 results within limits (up to 50 closest results for each mass)

Elements Used:

C: 0-100 H: 0-200 N: 3-3 O: 0-12 Cl: 1-1 I: 1-1

12-Dec-2014

kst-12dec14-1054 85 (1.572) Cn (Cen.5, 50.00, A); Sm (SG, 3x5.00); Sb (12.5.00); Sg (SG, 3x5.00)

TOF MS ES+  
1.23e+003

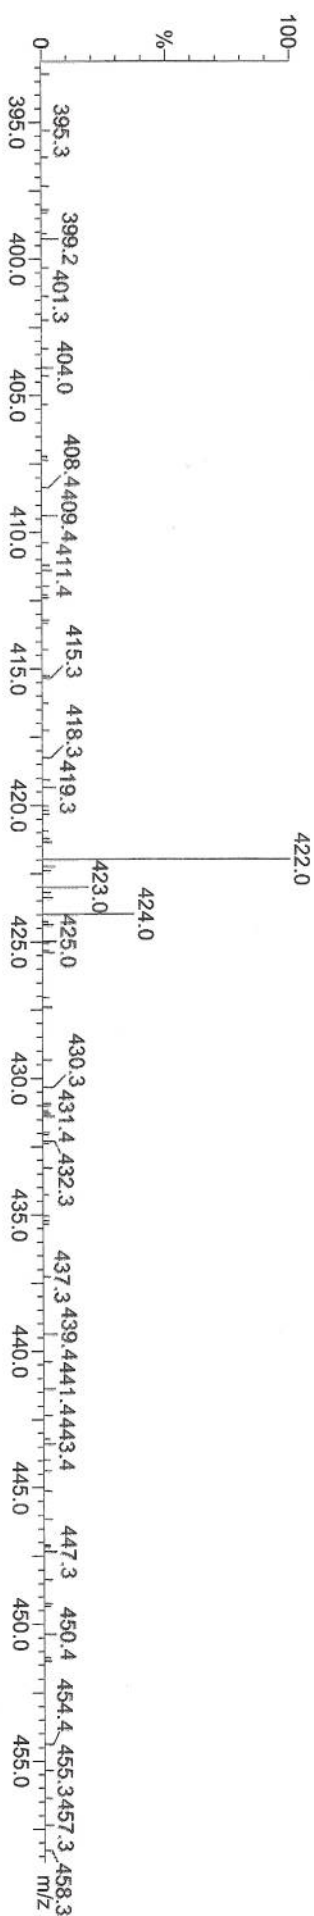

Minimum: 25.0 10.0 -50.0  
Maximum: 500.0

| Mass     | Calc. Mass | mDa   | PPM   | DBE  | i-FIT | Formula            |
|----------|------------|-------|-------|------|-------|--------------------|
| 421.9771 | 421.9768   | 0.3   | 0.7   | 7.5  | 2.5   | C13 H14 N3 O3 Cl I |
|          | 421.9827   | -5.6  | -13.3 | -1.5 | 32.6  | C6 H18 N3 O8 Cl I  |
|          | 421.9675   | 9.6   | 22.8  | -5.5 | 70.5  | C2 H18 N3 O11 Cl I |
|          | 421.9921   | -15.0 | -35.5 | 11.5 | 9.3   | C17 H14 N3 Cl I    |
|          | 421.9616   | 15.5  | 36.7  | 3.5  | 21.8  | C9 H14 N3 O6 Cl I  |
|          | 421.9980   | -20.9 | -49.5 | 2.5  | 22.3  | C10 H18 N3 O5 Cl I |
|          | 421.9557   | 21.4  | 50.7  | 12.5 | 15.7  | C16 H10 N3 O Cl I  |



=====  
Acq. Operator : KIRAN  
Acq. Instrument : Instrument 1 Location : Vial 1  
Injection Date : 9/22/2015 4:19:44 PM Inj : 1  
Inj Volume : 10.0 µl  
Acq. Method : C:\CHEM32\1\METHODS\KST0050.M  
Last changed : 9/22/2015 3:56:18 PM by KIRAN  
Analysis Method : C:\CHEM32\1\METHODS\KST0050.M  
Last changed : 9/11/2015 5:21:48 PM by KIRAN  
Method Info : ESI neg

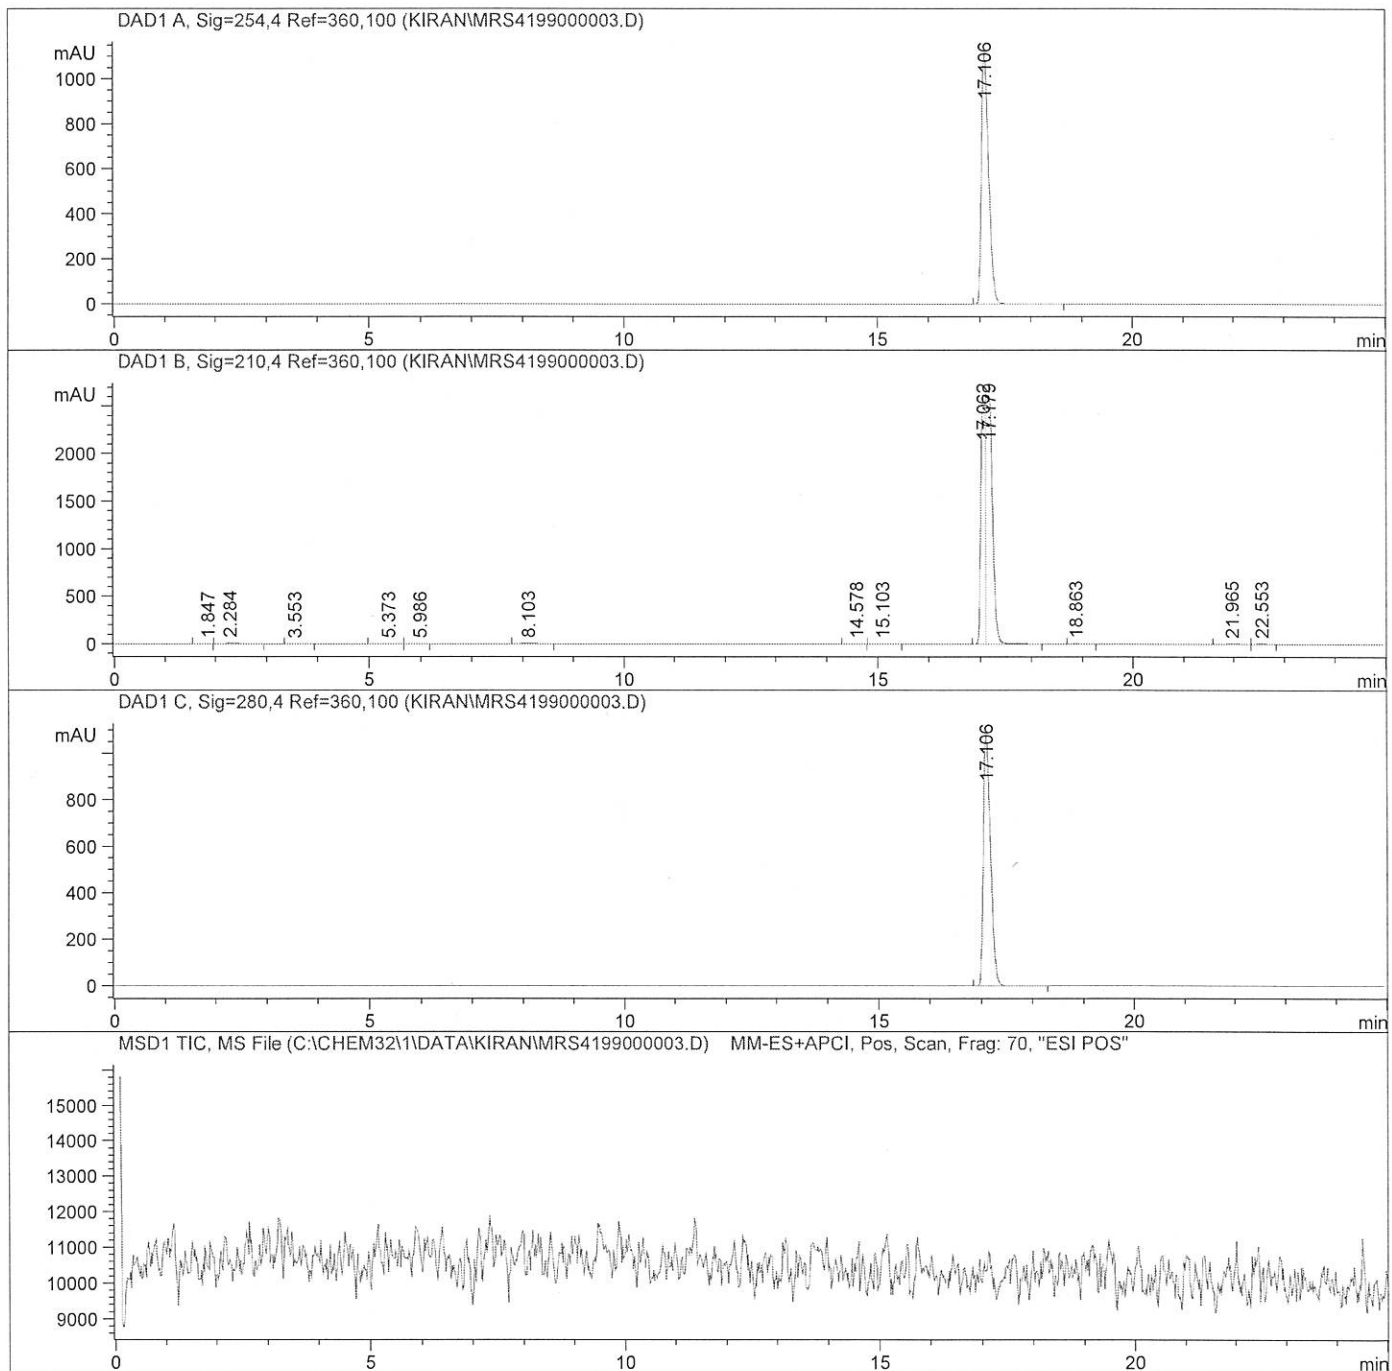

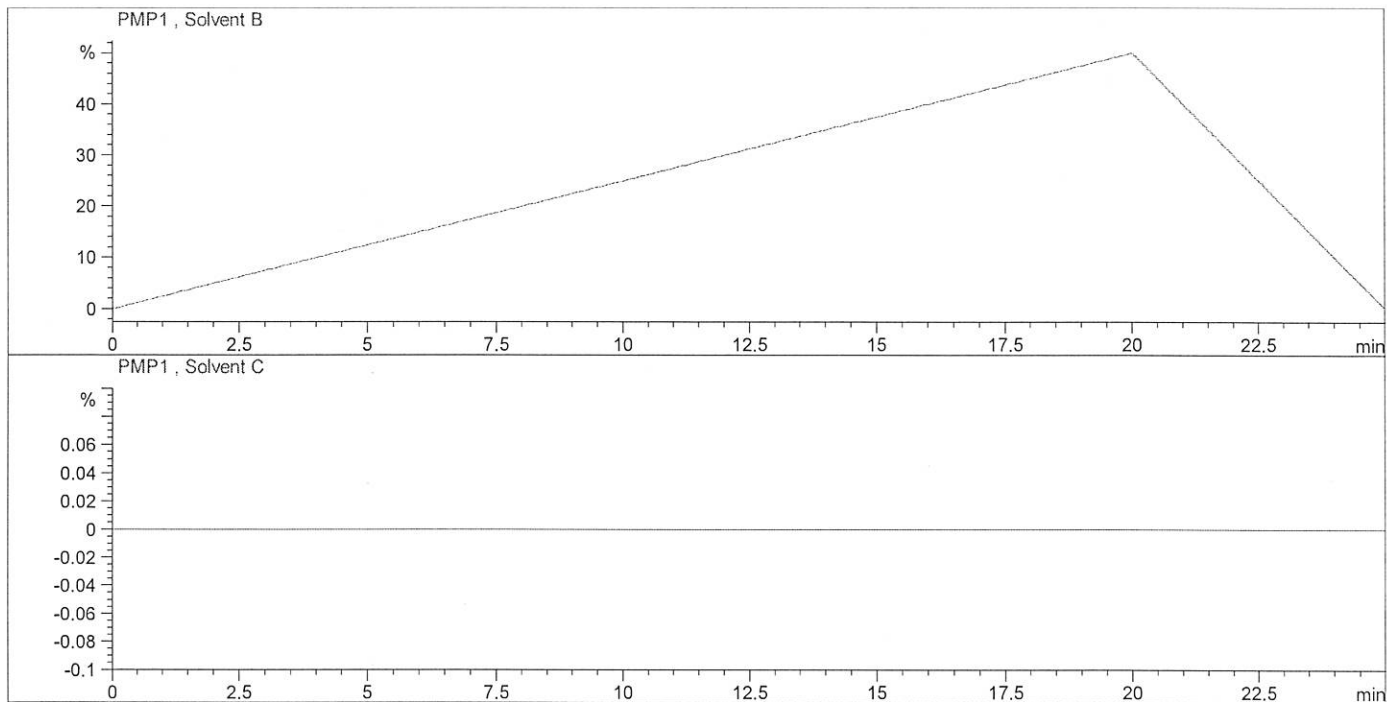

=====  
 Area Percent Report  
 =====

Sorted By : Signal  
 Multiplier : 1.0000  
 Dilution : 1.0000  
 Sample Amount: : 10.00000 [ng/ul] (not used in calc.)  
 Use Multiplier & Dilution Factor with ISTDs

Signal 1: DAD1 A, Sig=254,4 Ref=360,100

| Peak # | RetTime [min] | Type | Width [min] | Area [mAU*s] | Height [mAU] | Area %   |
|--------|---------------|------|-------------|--------------|--------------|----------|
| 1      | 17.106        | BB   | 0.1526      | 1.09337e4    | 1112.66028   | 100.0000 |

Totals : 1.09337e4 1112.66028

Signal 2: DAD1 B, Sig=210,4 Ref=360,100

| Peak # | RetTime [min] | Type | Width [min] | Area [mAU*s] | Height [mAU] | Area % |
|--------|---------------|------|-------------|--------------|--------------|--------|
| 1      | 1.847         | BB   | 0.0865      | 9.38568      | 1.47068      | 0.0239 |
| 2      | 2.284         | BB   | 0.1989      | 156.80090    | 10.45777     | 0.3987 |
| 3      | 3.553         | BB   | 0.2251      | 34.94678     | 2.35596      | 0.0889 |
| 4      | 5.373         | BB   | 0.1808      | 17.27020     | 1.37210      | 0.0439 |
| 5      | 5.986         | BB   | 0.1753      | 15.29074     | 1.24498      | 0.0389 |
| 6      | 8.103         | BB   | 0.2814      | 58.87189     | 2.91746      | 0.1497 |
| 7      | 14.578        | BB   | 0.1120      | 18.49826     | 2.50958      | 0.0470 |

## H NMR: Compound 30

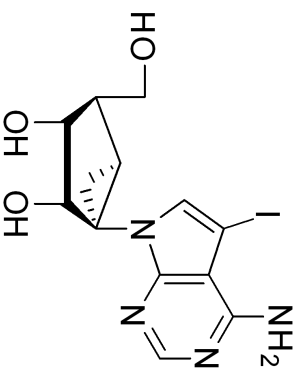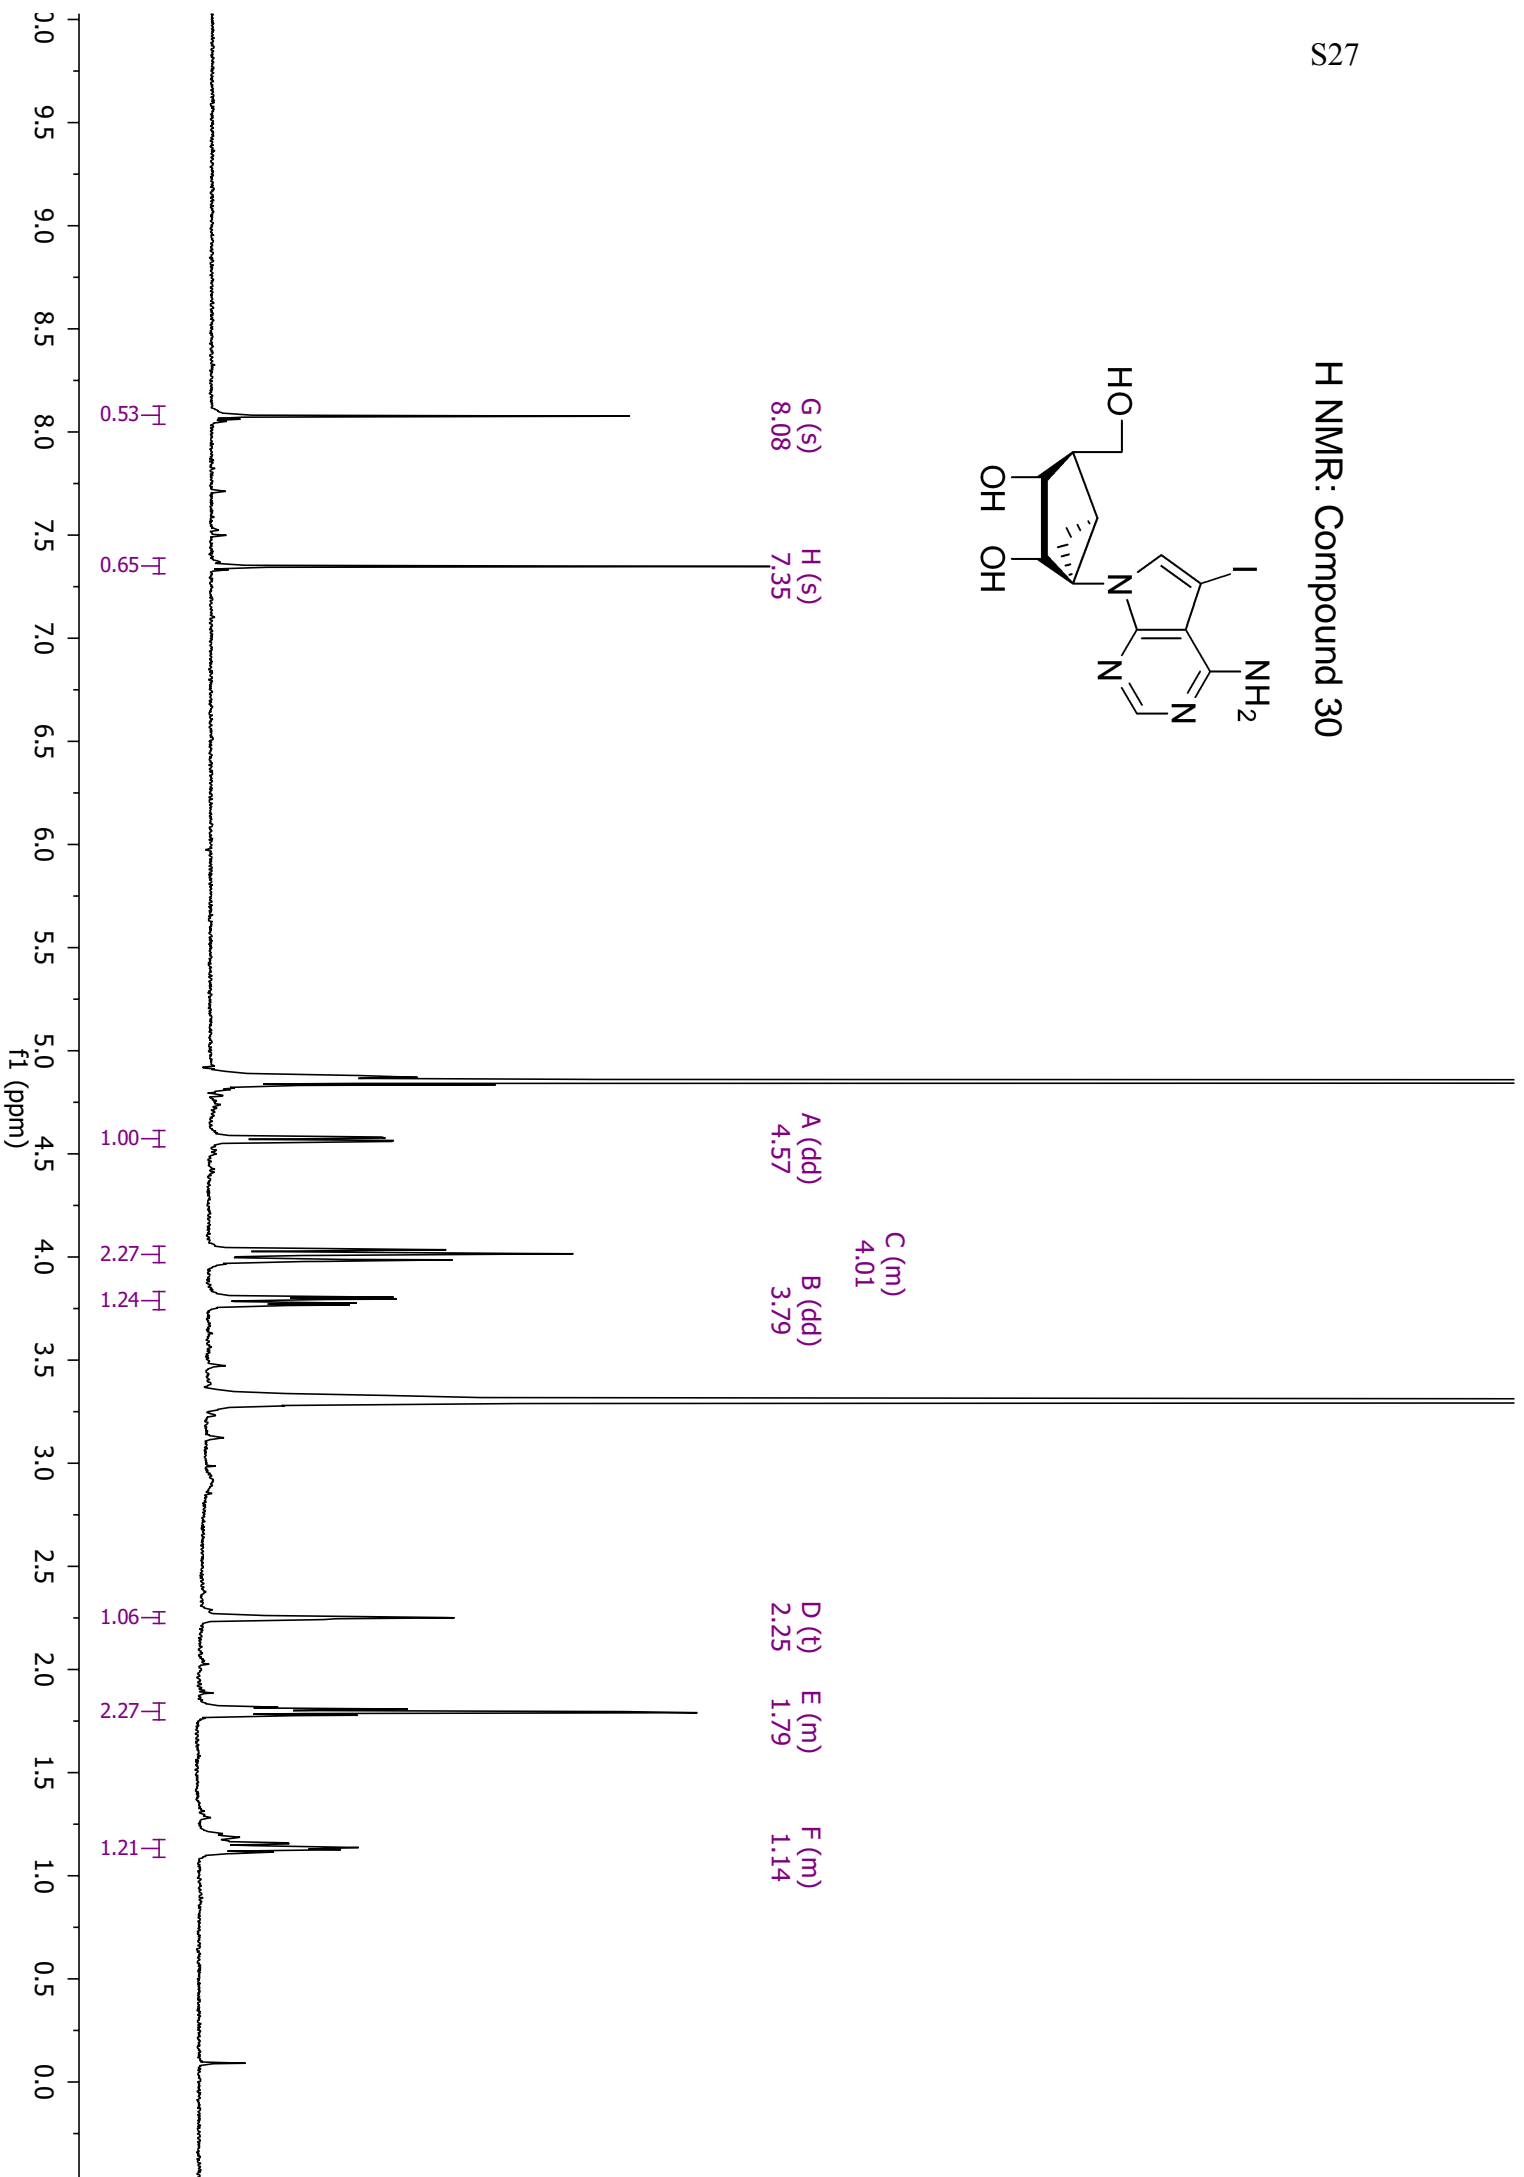

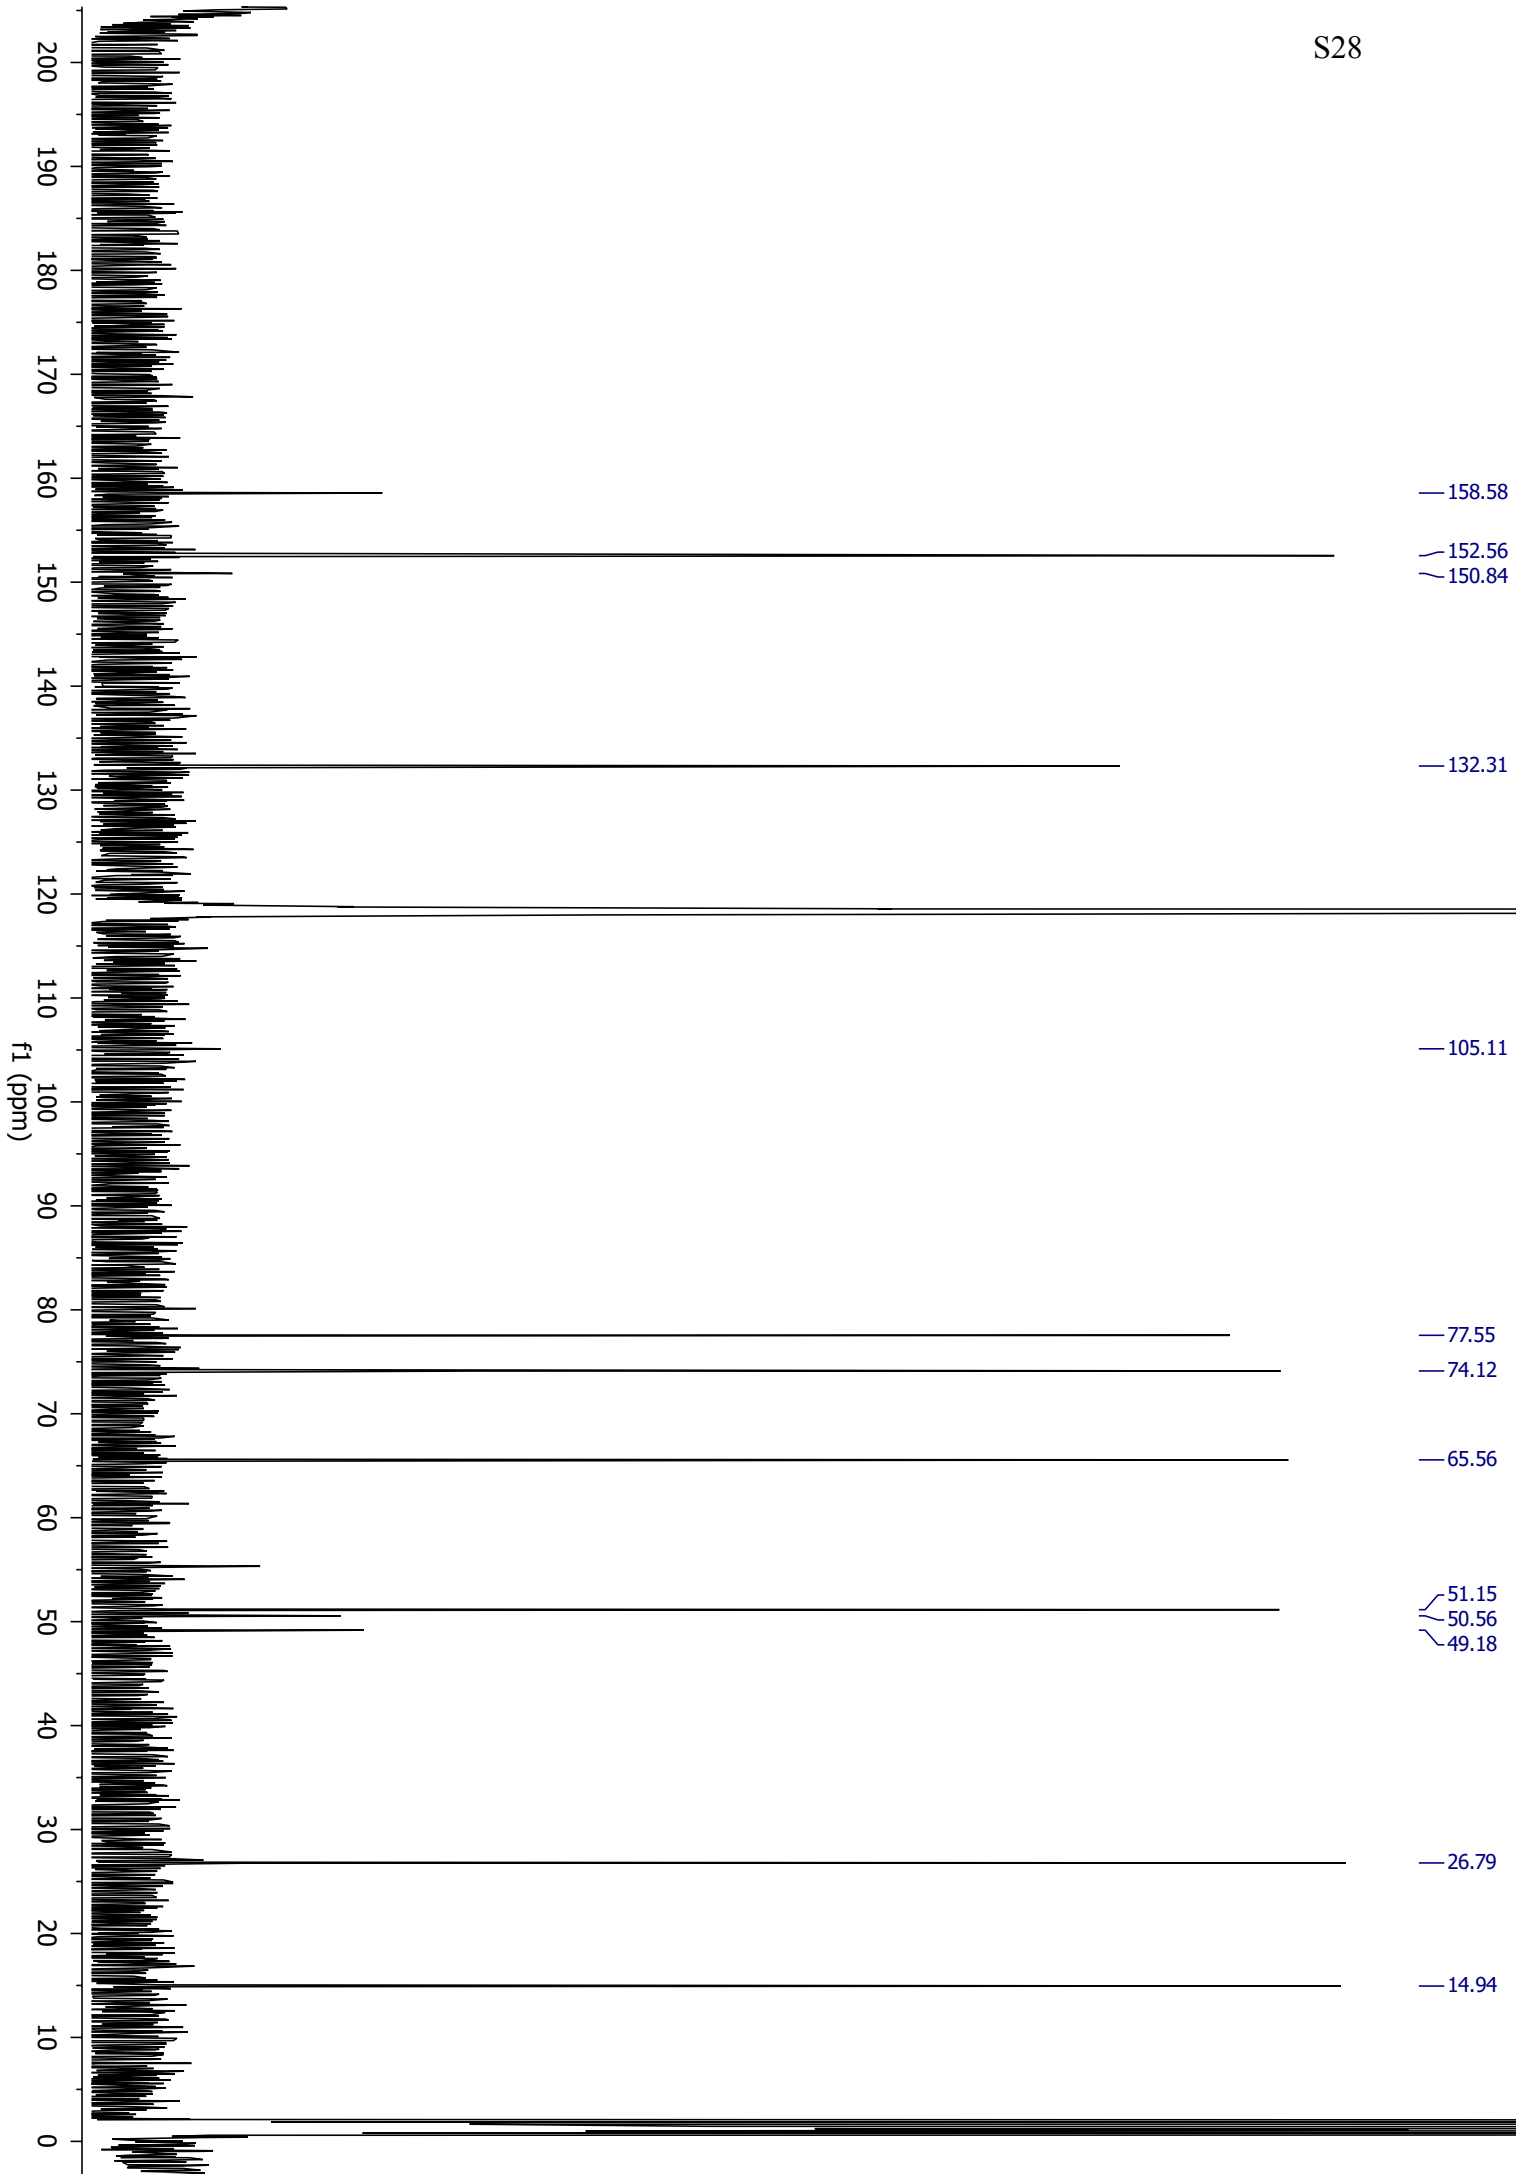

Single Mass Analysis

Tolerance = 25.0 mDa / DBE: min = -50.0, max = 500.0

Element prediction: Off

Number of isotope peaks used for i-FIT = 3

Monoisotopic Mass, Even Electron Ions

110 formula(e) evaluated with 7 results within limits (up to 50 closest results for each mass)

Elements Used:

C: 0-100 H: 0-200 N: 4-4 O: 0-12 I: 1-1

15-Dec-2014

kst-15dec14-1056 110 (2.034) Cn (Cen,5, 50.00, Ar); Sm (SG, 3x5.00); Sb (12.5.00)

TOF MS ES+  
5.75e+002

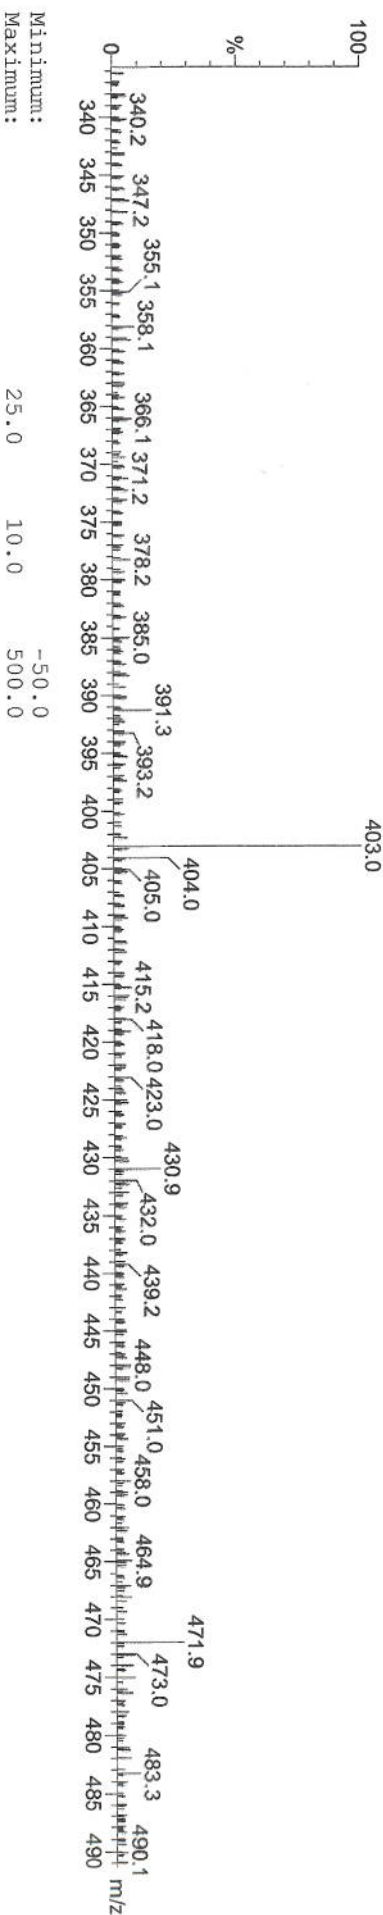

Minimum: 25.0  
Maximum: 10.0  
-50.0  
500.0

| Mass     | Calc. Mass | mDa   | PPM   | DBE  | i-FIT | Formula         |
|----------|------------|-------|-------|------|-------|-----------------|
| 403.0269 | 403.0267   | 0.2   | 0.5   | 7.5  | 10.1  | C13 H16 N4 O3 I |
|          | 403.0326   | -5.7  | -14.1 | -1.5 | 27.7  | C6 H20 N4 O8 I  |
|          | 403.0173   | 9.6   | 23.8  | -5.5 | 44.7  | C2 H20 N4 O11 I |
|          | 403.0420   | -15.1 | -37.5 | 11.5 | 9.8   | C17 H16 N4 I    |
|          | 403.0115   | 15.4  | 38.2  | 3.5  | 20.7  | C9 H16 N4 O6 I  |
|          | 403.0478   | -20.9 | -51.9 | 2.5  | 21.6  | C10 H20 N4 O5 I |
|          | 403.0056   | 21.3  | 52.9  | 12.5 | 12.2  | C16 H12 N4 O I  |

```

=====
Injection Date   : 3/20/2015 4:43:53 PM
Sample Name     : MRS4200
Acq. Operator  : KIRAN
Acq. Method    : C:\HPCHEM\1\METHODS\KIRANADK.M
Last changed   : 3/20/2015 4:45:20 PM by KIRAN
                 (modified after loading)
Analysis Method : C:\HPCHEM\1\METHODS\KIRANADK.M
Last changed   : 3/20/2015 5:34:44 PM by KIRAN
                 (modified after loading)
=====
    
```

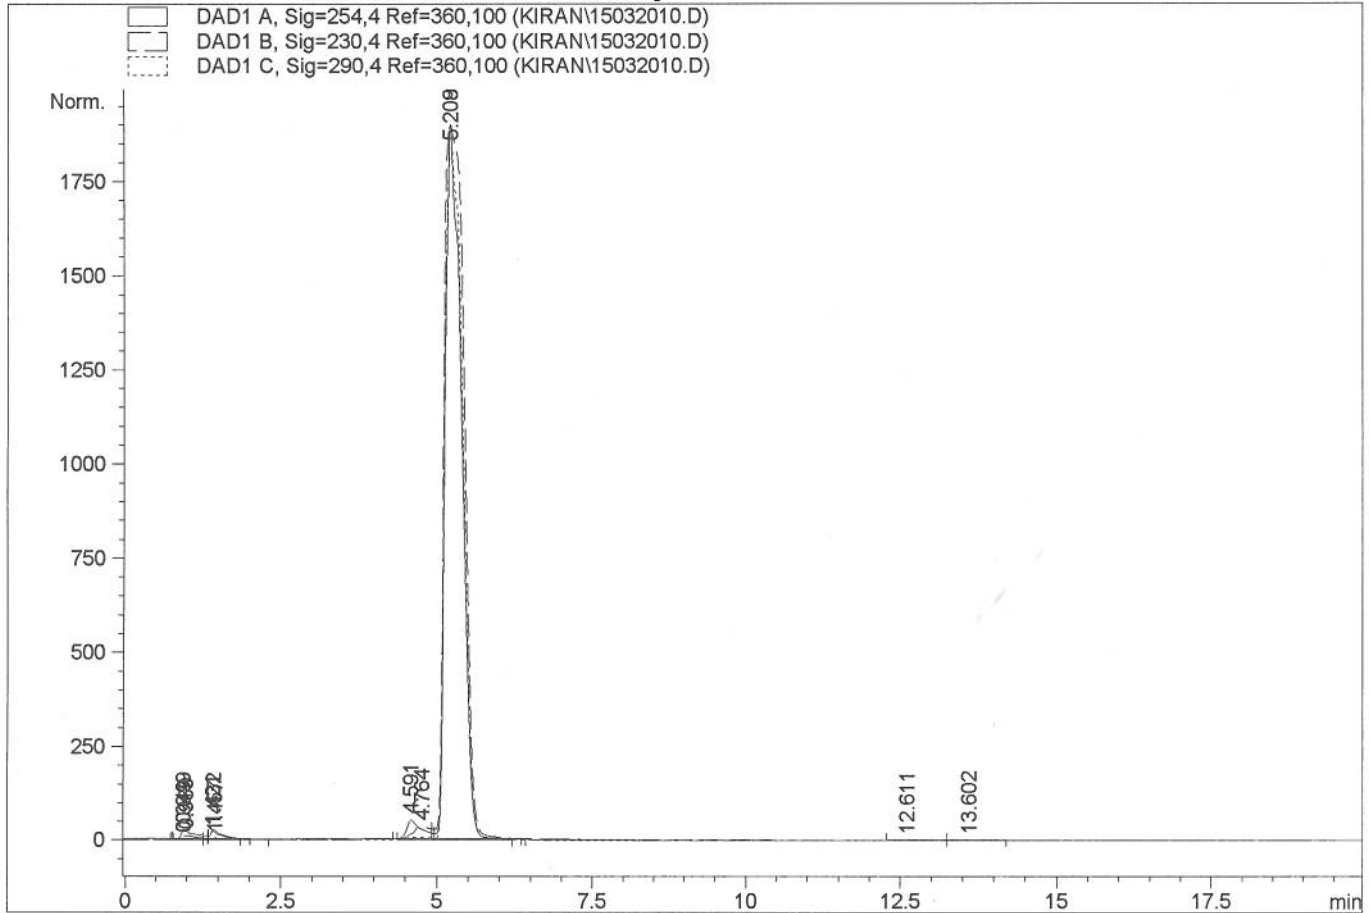

=====  
 Area Percent Report  
 =====

```

Sorted By      : Signal
Multiplier    : 1.0000
Dilution      : 1.0000
Use Multiplier & Dilution Factor with ISTDs
    
```

Signal 1: DAD1 A, Sig=254,4 Ref=360,100

| Peak # | RetTime [min] | Type | Width [min] | Area [mAU*s] | Height [mAU] | Area %  |
|--------|---------------|------|-------------|--------------|--------------|---------|
| 1      | 0.949         | BV   | 0.1927      | 164.42644    | 11.10704     | 1.0075  |
| 2      | 1.432         | VP   | 0.1759      | 134.14694    | 10.57861     | 0.8219  |
| 3      | 4.591         | BV   | 0.2320      | 386.25388    | 22.99147     | 2.3667  |
| 4      | 5.208         | VB   | 0.2501      | 1.56248e4    | 867.49646    | 95.7367 |
| 5      | 12.611        | PP   | 0.3581      | 5.10952      | 1.87425e-1   | 0.0313  |
| 6      | 13.602        | VB   | 0.2634      | 5.86944      | 2.90903e-1   | 0.0360  |

Totals : 1.63207e4 912.65190

## H NMR: Compound 32

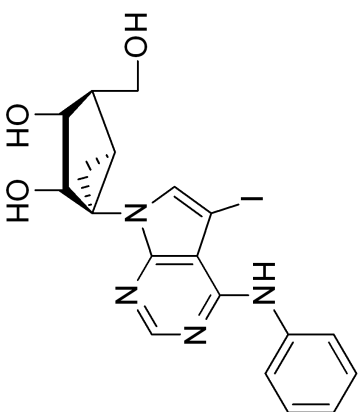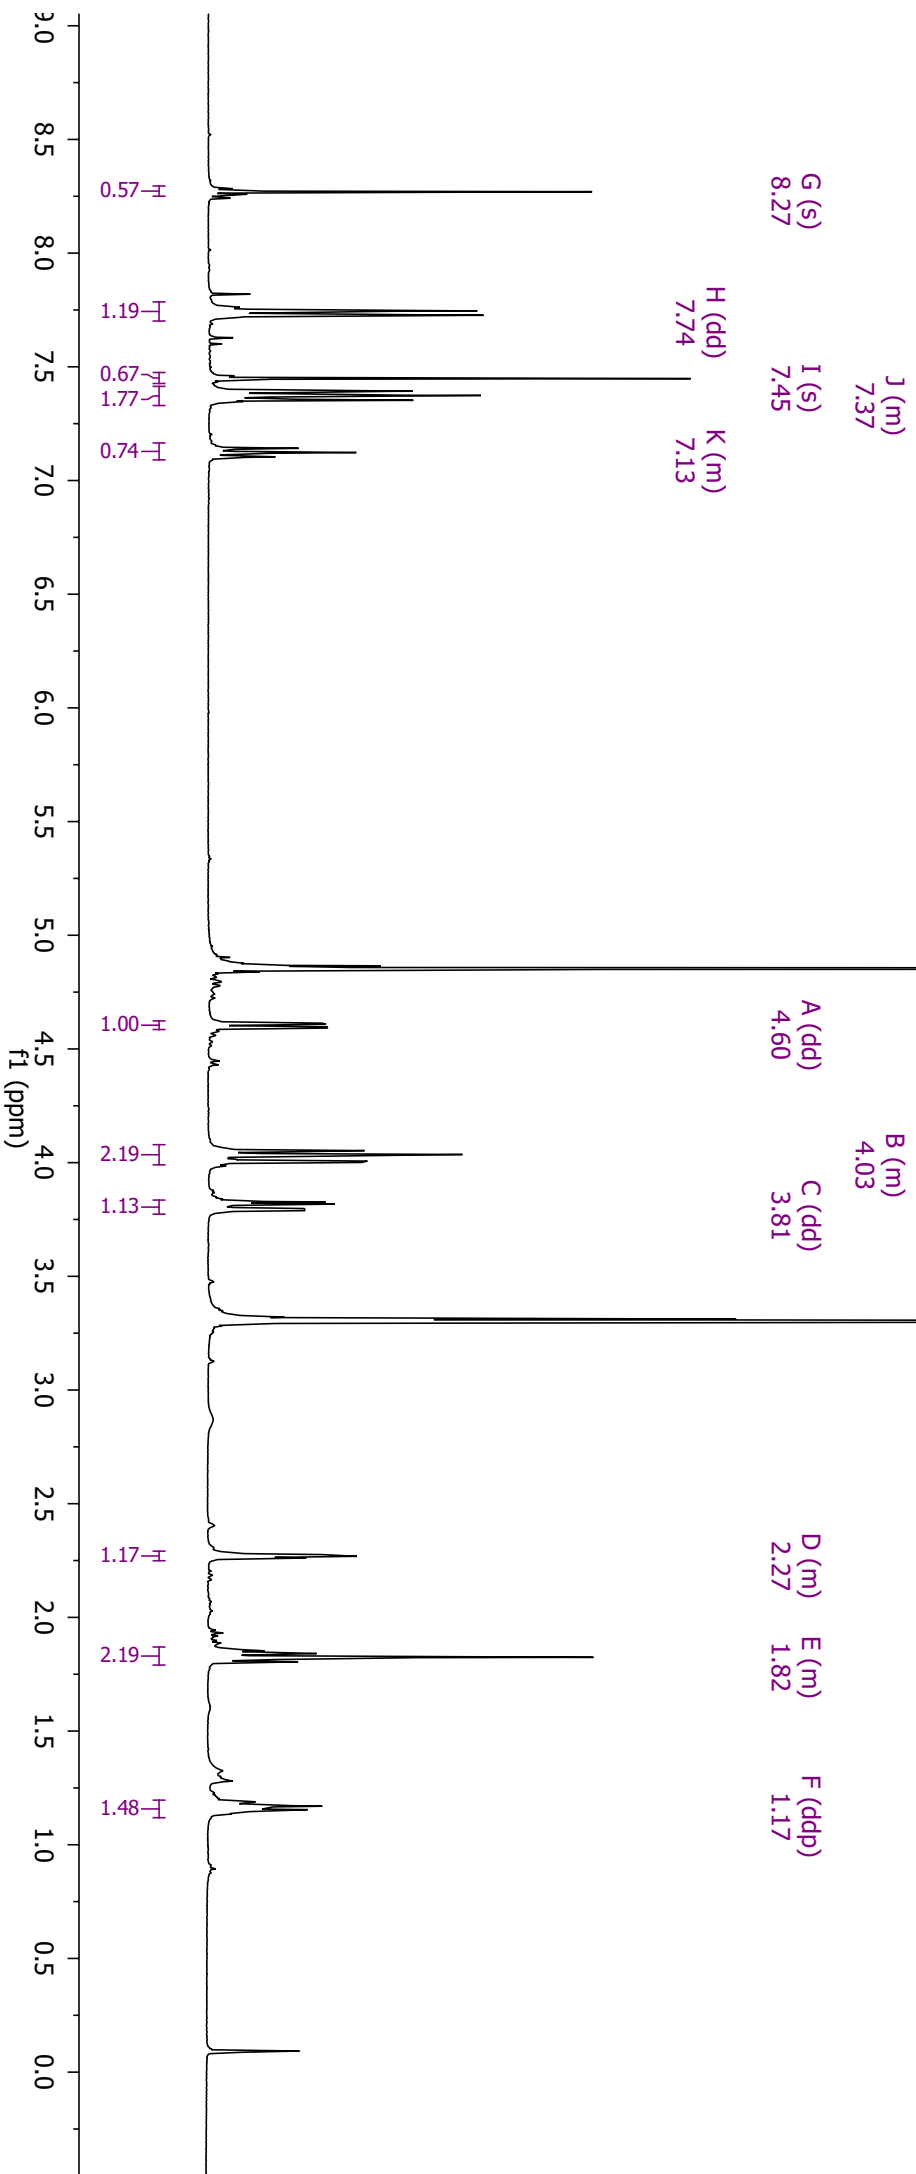

**Single Mass Analysis**

Tolerance = 10.0 mDa / DBE: min = -50.0, max = 500.0  
 Element prediction: Off  
 Number of isotope peaks used for i-FIT = 3

Monoisotopic Mass, Even Electron Ions  
 166 formula(e) evaluated with 3 results within limits (up to 50 closest results for each mass)  
 Elements Used:  
 C: 0-100 H: 0-200 N: 4-4 O: 0-30 I: 1-1

15-Jan-2015  
 Kst-15Jan15-1064 65 (1.202) Cn (Cen, 5, 50.00, Ar); Sm (SG, 3x5.00); Sb (12.5.00)

TOF MS ES+  
 1.32e+003

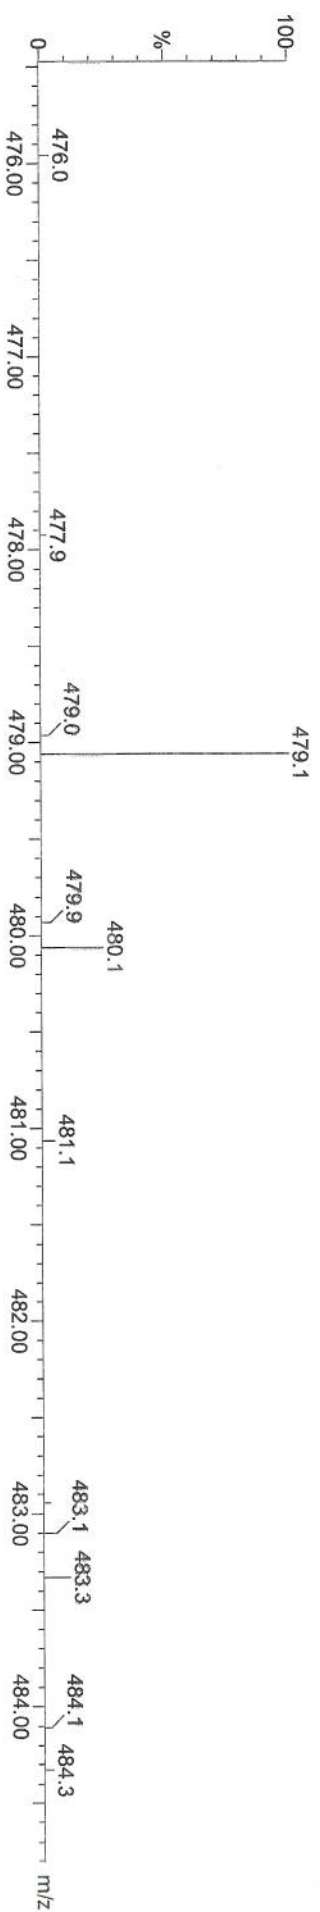

| Mass     | Calc. Mass | mDa  | PPM   | DBE   | i-FIT | Formula         |
|----------|------------|------|-------|-------|-------|-----------------|
| 479.0589 | 479.0580   | 0.9  | 1.9   | 11.5  | 4.4   | C19 H20 N4 O3 I |
|          | 479.0545   | 4.4  | 9.2   | -10.5 | 121.6 | C H28 N4 O16 I  |
|          | 479.0639   | -5.0 | -10.4 | 2.5   | 26.4  | C12 H24 N4 O8 I |

Minimum: 10.0  
 Maximum: 10.0  
 -50.0  
 500.0



```

=====
Injection Date   : 3/11/2015 2:19:19 PM
Sample Name     : MRS4201                      Location : Vial 1
Acq. Operator  : KIRAN
Method         : C:\HPCHEM\1\METHODS\KIRANADK.M
Last changed   : 3/11/2015 1:19:46 PM by KIRAN
                (modified after loading)
    
```

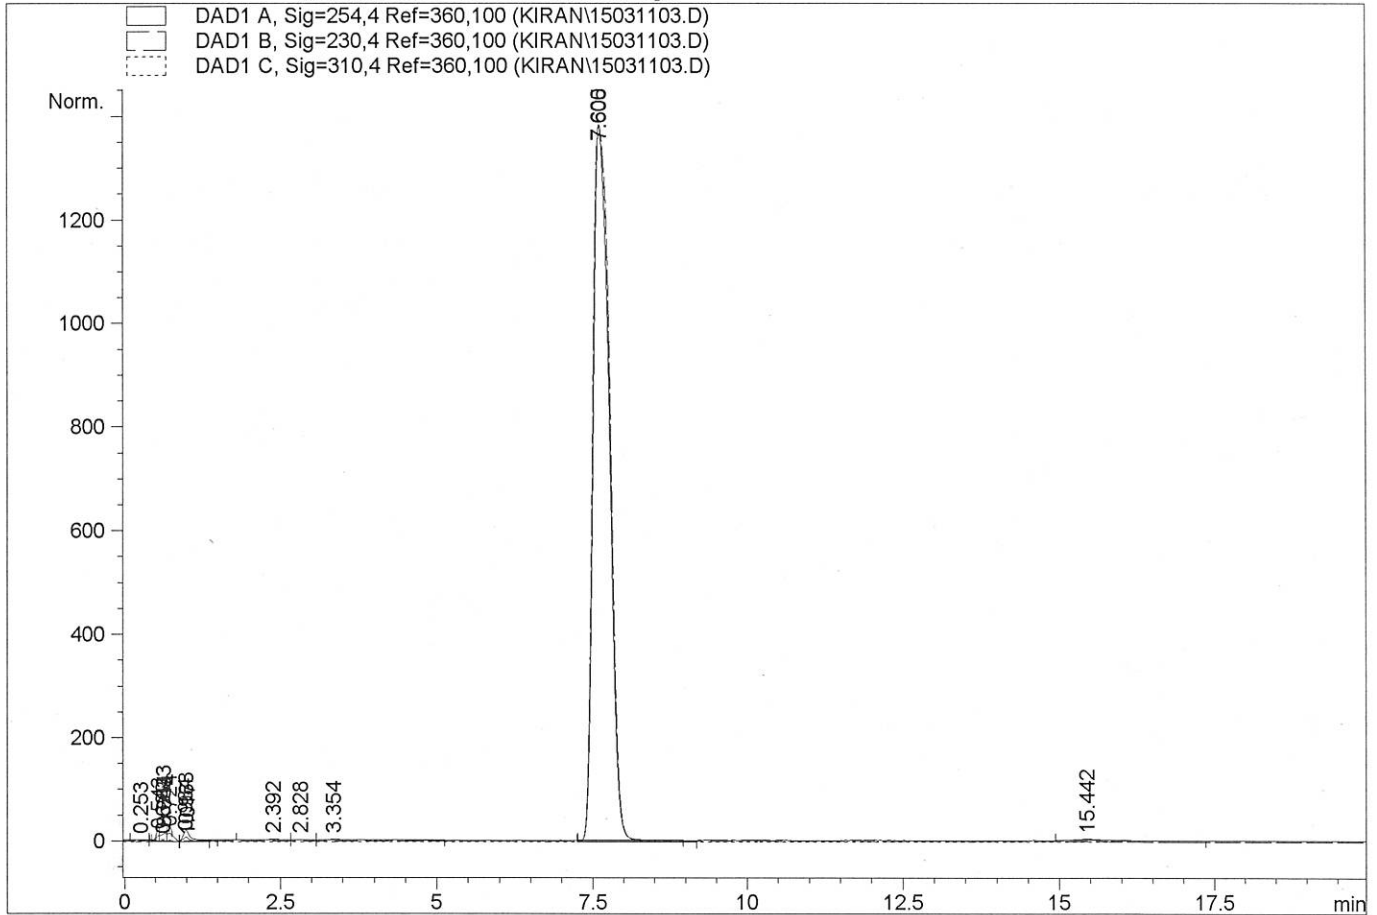

=====  
Area Percent Report  
=====

```

Sorted By      : Signal
Multiplier     : 1.0000
Dilution       : 1.0000
Sample Amount  : 20.00000 [ng/ul] (not used in calc.)
Use Multiplier & Dilution Factor with ISTDs
    
```

Signal 1: DAD1 A, Sig=254,4 Ref=360,100

| Peak # | RetTime [min] | Type | Width [min] | Area [mAU*s] | Height [mAU] | Area %  |
|--------|---------------|------|-------------|--------------|--------------|---------|
| 1      | 0.253         | BV   | 0.1722      | 3.83279      | 3.01671e-1   | 0.0510  |
| 2      | 0.633         | VP   | 0.1862      | 147.05983    | 10.32053     | 1.9583  |
| 3      | 0.988         | VB   | 0.1251      | 54.51635     | 6.29256      | 0.7259  |
| 4      | 2.392         | PV   | 0.3597      | 9.04957      | 3.38762e-1   | 0.1205  |
| 5      | 2.828         | VV   | 0.1889      | 3.53570      | 2.33220e-1   | 0.0471  |
| 6      | 3.354         | VP   | 0.3622      | 9.71599      | 3.90639e-1   | 0.1294  |
| 7      | 7.605         | BP   | 0.2956      | 7247.27979   | 407.25183    | 96.5056 |
| 8      | 15.442        | PP   | 0.5366      | 34.70752     | 9.71947e-1   | 0.4622  |

Totals : 7509.69754 426.10115

## H NMR: Compound 34

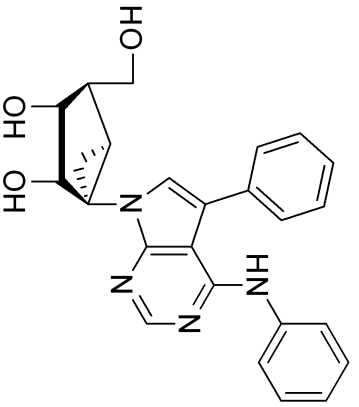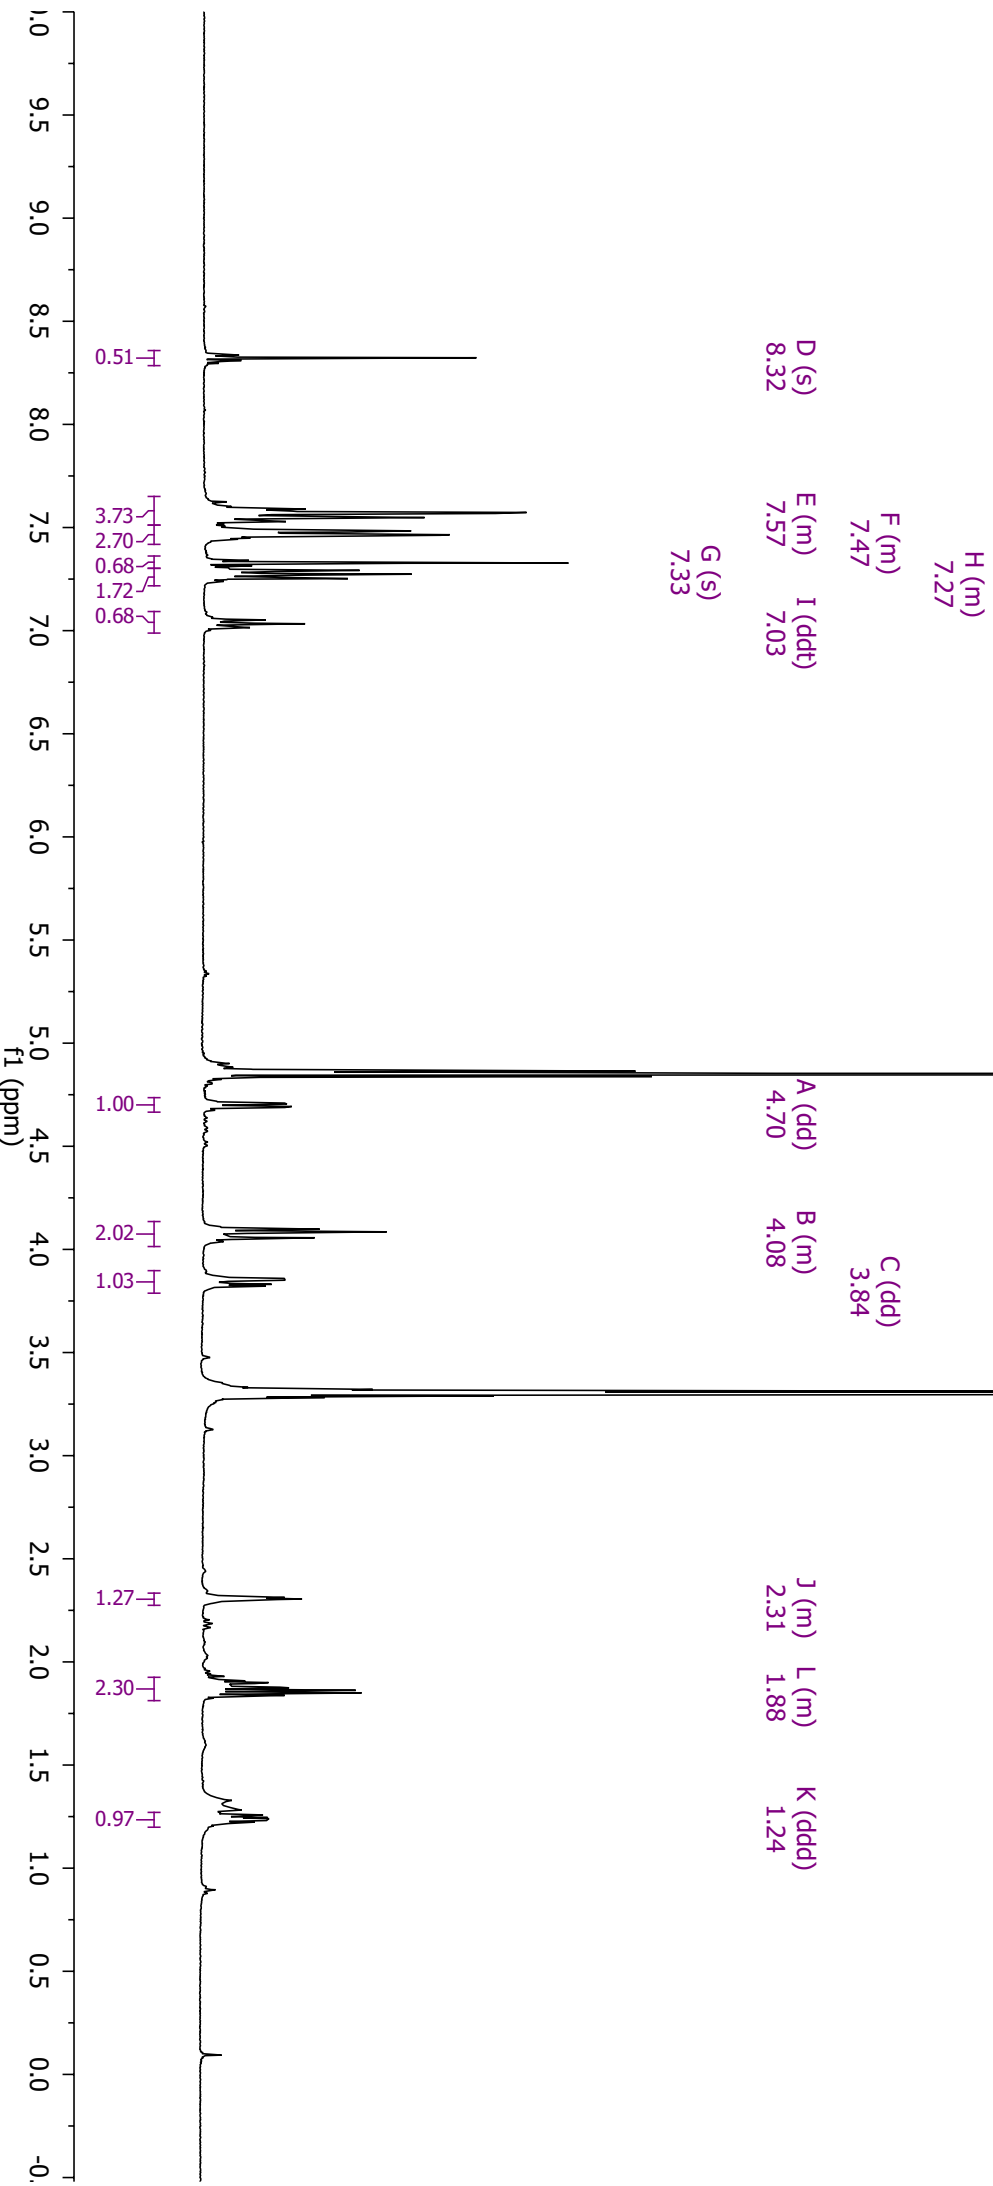

Single Mass Analysis

Tolerance = 10.0 mDa / DBE: min = -50.0, max = 500.0

Element prediction: Off

Number of isotope peaks used for i-FIT = 3

Monoisotopic Mass, Even Electron Ions  
 206 formula(e) evaluated with 3 results within limits (up to 19 closest results for each mass)

Elements Used:

C: 0-100 H: 0-200 N: 4-4 O: 0-18

29-Jan-2015

kst-29jan15-1072 166 (3.051) Cn (Gen.5, 50.00, Ar); Sm (SG, 3x5.00); Sb (12.5.00)

TOF MS ES+  
 1.45e+003

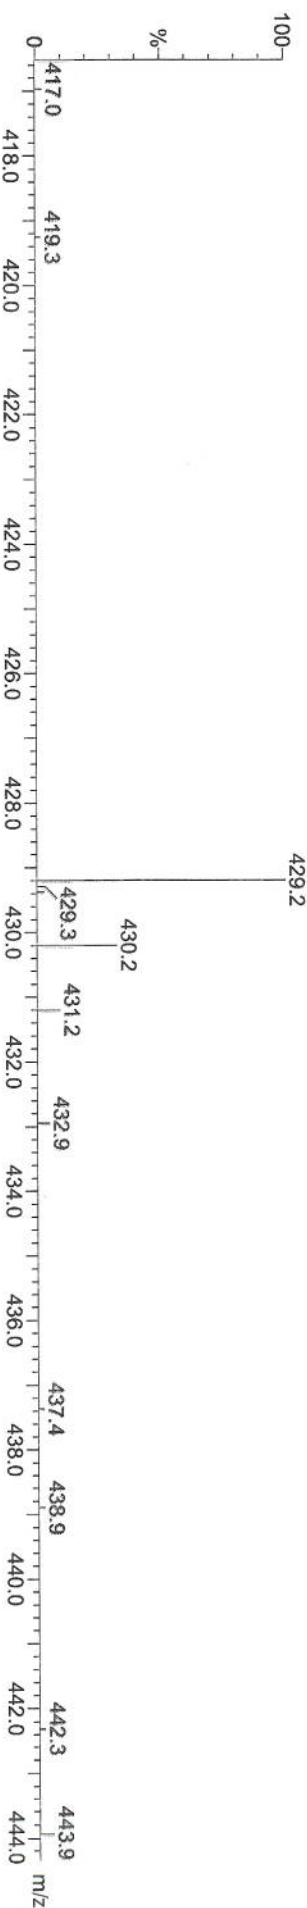

Minimum: 10.0  
 Maximum: 10.0

| Mass     | Calc. Mass | mDa  | PPM   | DBE  | i-FIT | Formula       |
|----------|------------|------|-------|------|-------|---------------|
| 429.1935 | 429.1927   | 0.8  | 1.9   | 15.5 | 14.4  | C25 H25 N4 O3 |
|          | 429.1892   | 4.3  | 10.0  | -6.5 | 124.9 | C7 H33 N4 O16 |
|          | 429.1985   | -5.0 | -11.6 | 6.5  | 38.7  | C18 H29 N4 O8 |

```

=====
Injection Date   : 3/11/2015 3:06:22 PM
Sample Name     : MRS4202                      Location : Vial 1
Acq. Operator  : KIRAN
Method         : C:\HPCHEM\1\METHODS\KIRANADK.M
Last changed   : 3/11/2015 1:19:46 PM by KIRAN
                (modified after loading)
  
```

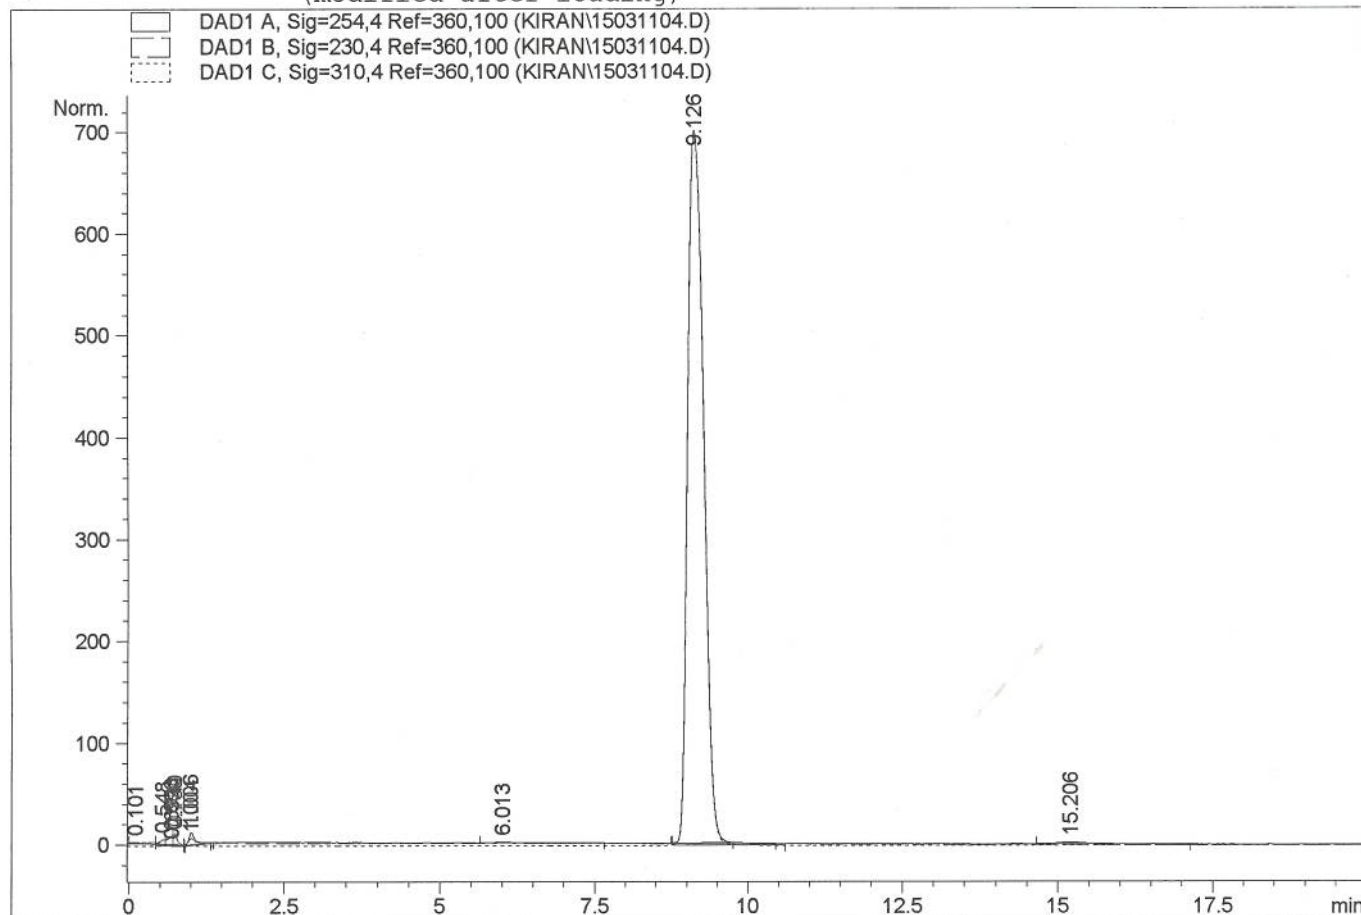

```

=====
                          Area Percent Report
=====
  
```

```

Sorted By           :      Signal
Multiplier          :      1.0000
Dilution            :      1.0000
Sample Amount       :      20.00000 [ng/ul]   (not used in calc.)
Use Multiplier & Dilution Factor with ISTDs
  
```

Signal 1: DAD1 A, Sig=254,4 Ref=360,100

| Peak # | RetTime [min] | Type | Width [min] | Area [mAU*s] | Height [mAU] | Area %  |
|--------|---------------|------|-------------|--------------|--------------|---------|
| 1      | 0.101         | BV   | 0.3497      | 10.84599     | 3.72472e-1   | 0.2151  |
| 2      | 0.740         | VP   | 0.1565      | 58.08654     | 4.68872      | 1.1522  |
| 3      | 1.006         | VB   | 0.1197      | 42.08311     | 4.92255      | 0.8348  |
| 4      | 6.013         | PP   | 0.3598      | 10.67149     | 3.70724e-1   | 0.2117  |
| 5      | 9.126         | BP   | 0.2917      | 4895.50293   | 269.82489    | 97.1093 |
| 6      | 15.206        | PP   | 0.4892      | 24.03884     | 7.93965e-1   | 0.4768  |

```
Totals :                      5041.22889  280.97331
```

Results obtained with enhanced integrator!

## H NMR: Compound 38a

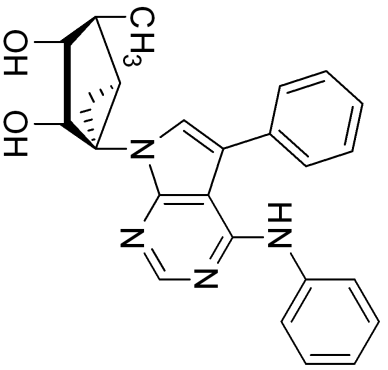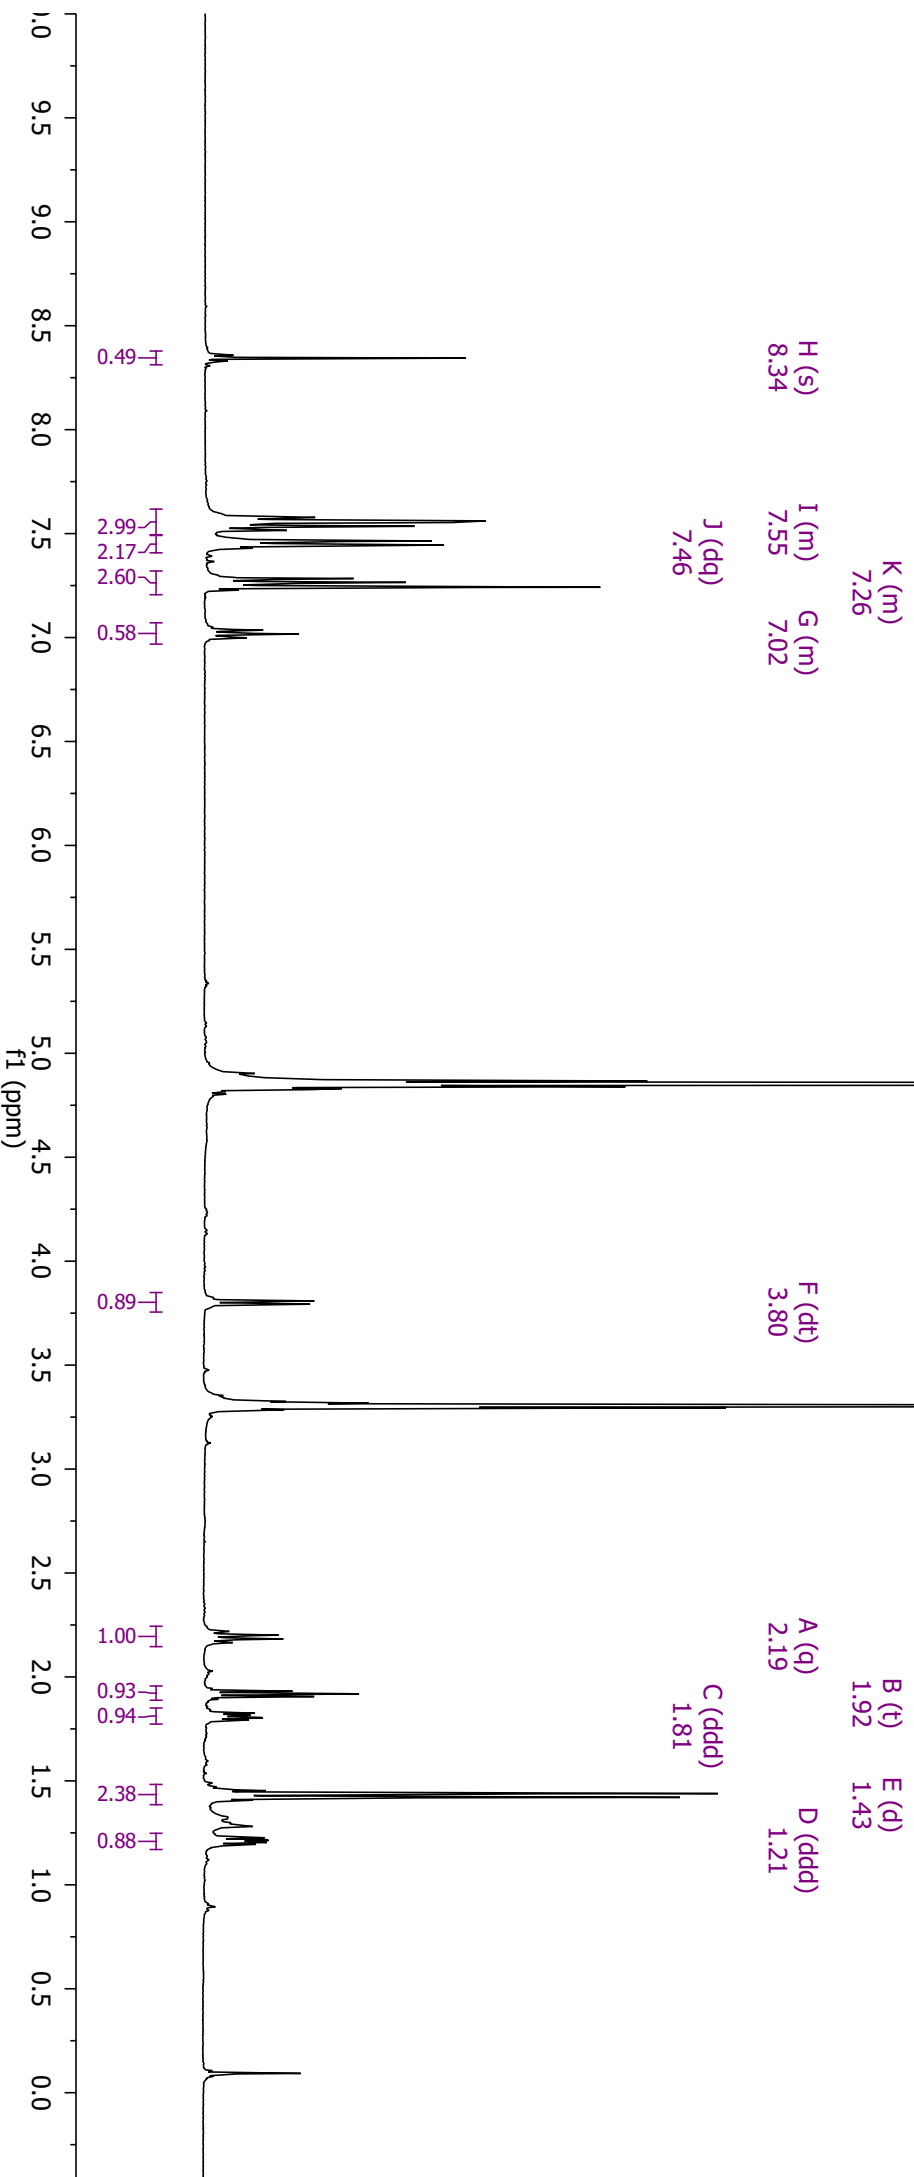

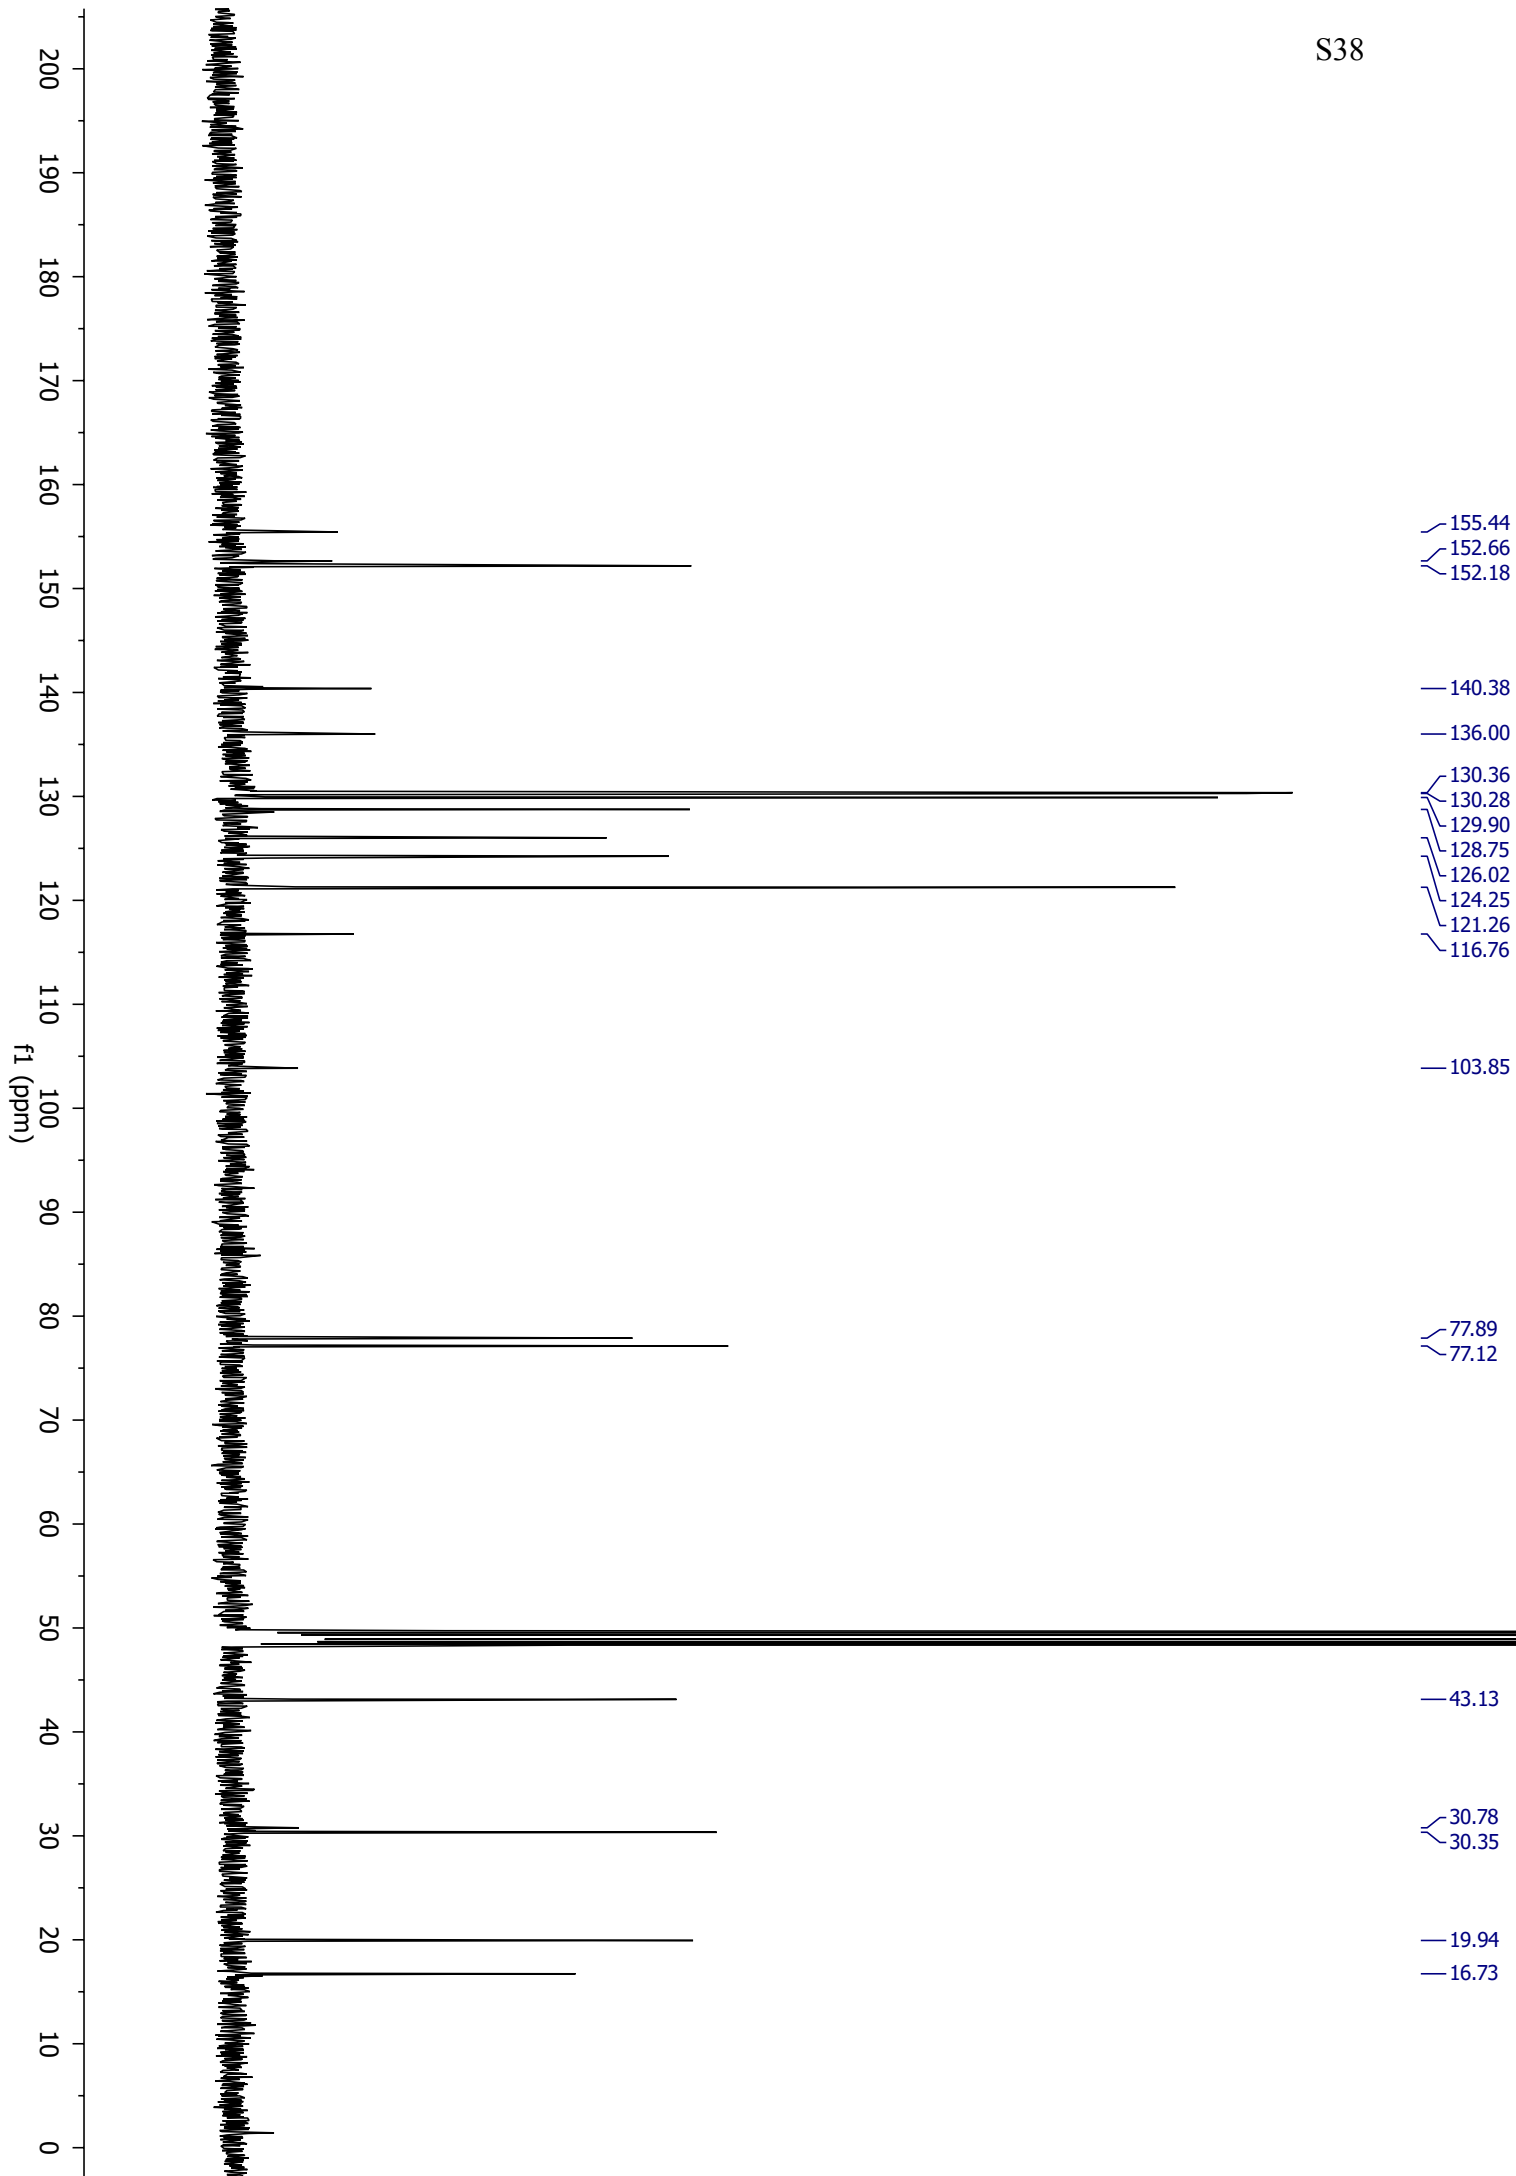

Single Mass Analysis

Tolerance = 10.0 mDa / DBE: min = -50.0, max = 500.0

Element prediction: Off

Number of isotope peaks used for i-FIT = 3

Monoisotopic Mass, Even Electron Ions

211 formula(e) evaluated with 5 results within limits (up to 19 closest results for each mass)

Elements Used:

C: 0-100 H: 0-200 N: 4-4 O: 0-30

09-Mar-2015

Kst-09mar15-1081 170 (3.144) Cn (Cen.5, 50.00, Ar); Sm (SG, 3x5.00); Sb (12.5.00)

TOF MS ES+  
9.02e+002

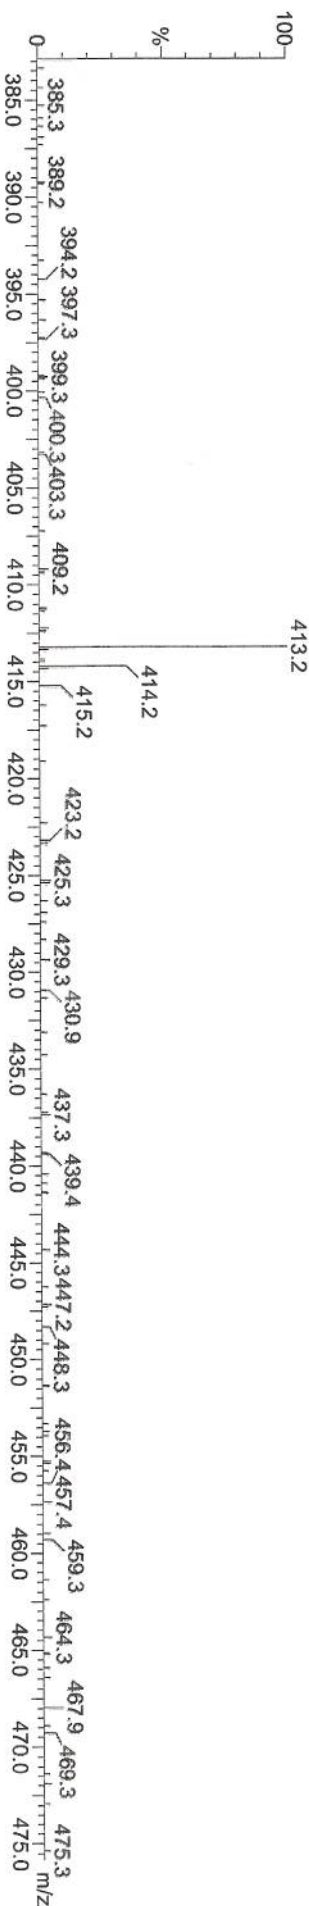

Minimum: 10.0  
Maximum: 10.0

| Mass     | Calc. Mass | mDa  | PPM   | DBE   | i-FIT | Formula        |
|----------|------------|------|-------|-------|-------|----------------|
| 413.1977 | 413.1978   | -0.1 | -0.2  | 15.5  | 9.2   | C25 H25 N4 O2  |
|          | 413.2001   | -2.4 | -5.8  | -15.5 | 141.8 | H37 N4 O20     |
|          | 413.1942   | 3.5  | 8.5   | -6.5  | 87.0  | C7 H33 N4 O15  |
|          | 413.2036   | -5.9 | -14.3 | 6.5   | 28.4  | C18 H29 N4 O7  |
|          | 413.1884   | 9.3  | 22.5  | 2.5   | 47.4  | C14 H29 N4 O10 |

```

=====
Injection Date   : 3/11/2015 1:20:58 PM
Sample Name     : MRS4203
Acq. Operator  : KIRAN
Method         : C:\HPCHEM\1\METHODS\KIRANADK.M
Last changed   : 3/11/2015 1:19:46 PM by KIRAN
                (modified after loading)
Location       : Vial 1
    
```

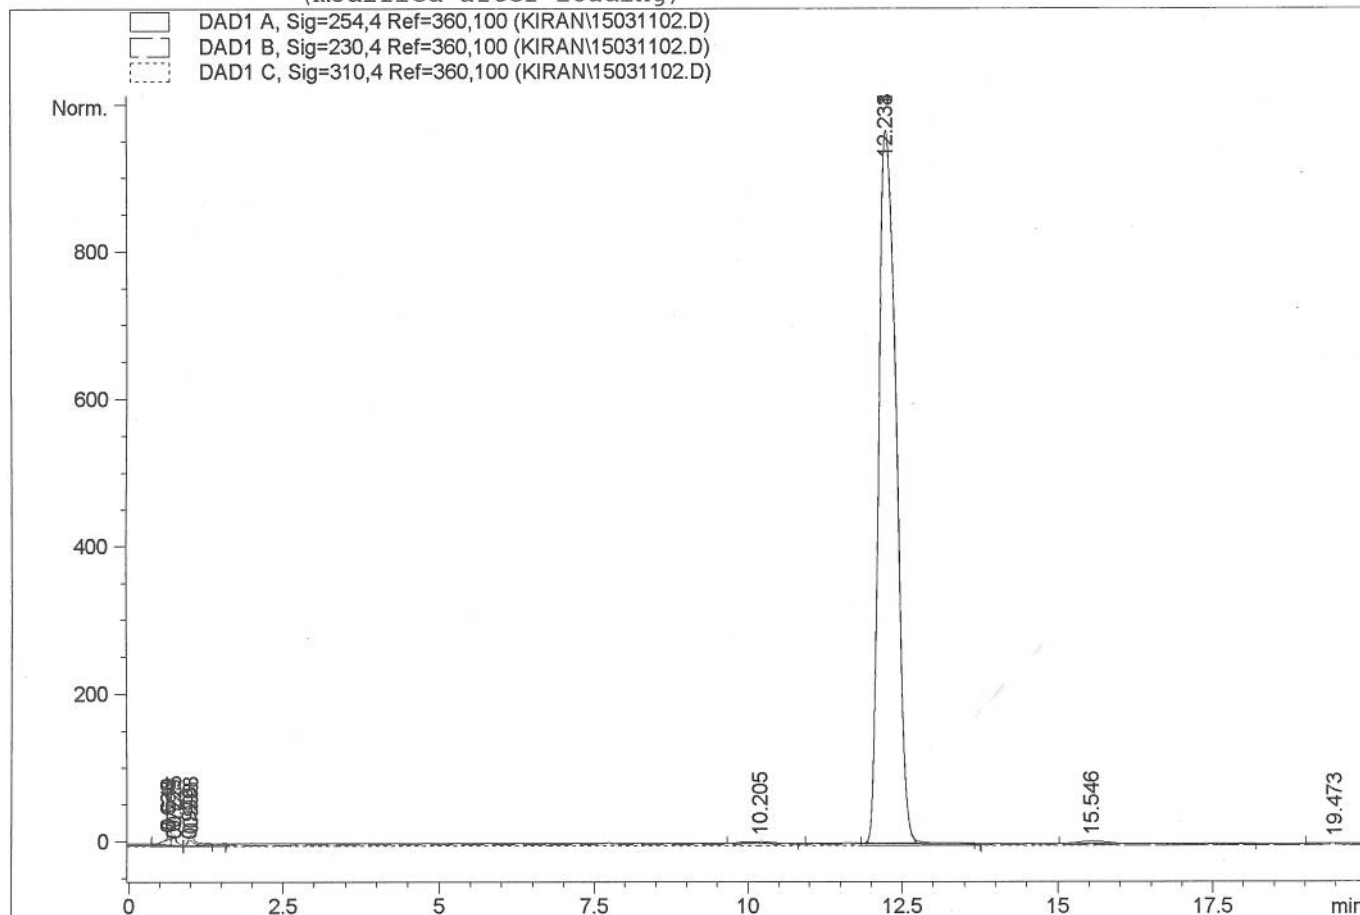

=====  
Area Percent Report  
=====

```

Sorted By      : Signal
Multiplier     : 1.0000
Dilution      : 1.0000
Sample Amount  : 20.00000 [ng/ul] (not used in calc.)
Use Multiplier & Dilution Factor with ISTDs
    
```

Signal 1: DAD1 A, Sig=254,4 Ref=360,100

| Peak # | RetTime [min] | Type | Width [min] | Area [mAU*s] | Height [mAU] | Area %  |
|--------|---------------|------|-------------|--------------|--------------|---------|
| 1      | 0.640         | BV   | 0.1075      | 39.80030     | 4.86134      | 0.5295  |
| 2      | 0.725         | VP   | 0.0775      | 34.21190     | 6.28869      | 0.4552  |
| 3      | 0.998         | VB   | 0.1349      | 59.24288     | 6.12125      | 0.7882  |
| 4      | 10.205        | PV   | 0.4124      | 34.24180     | 1.02861      | 0.4556  |
| 5      | 12.233        | PP   | 0.3160      | 7303.14941   | 380.42142    | 97.1679 |
| 6      | 15.546        | PP   | 0.5065      | 38.74314     | 1.24695      | 0.5155  |
| 7      | 19.473        | PBA  | 0.3487      | 6.62321      | 2.96399e-1   | 0.0881  |

Totals : 7516.01264 400.26464



H NMR: Compound 38b

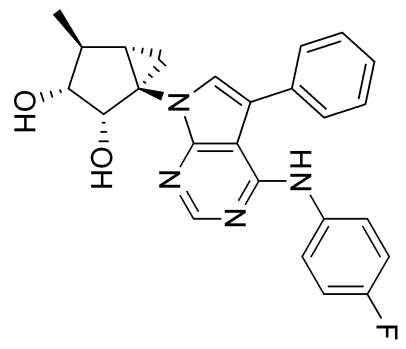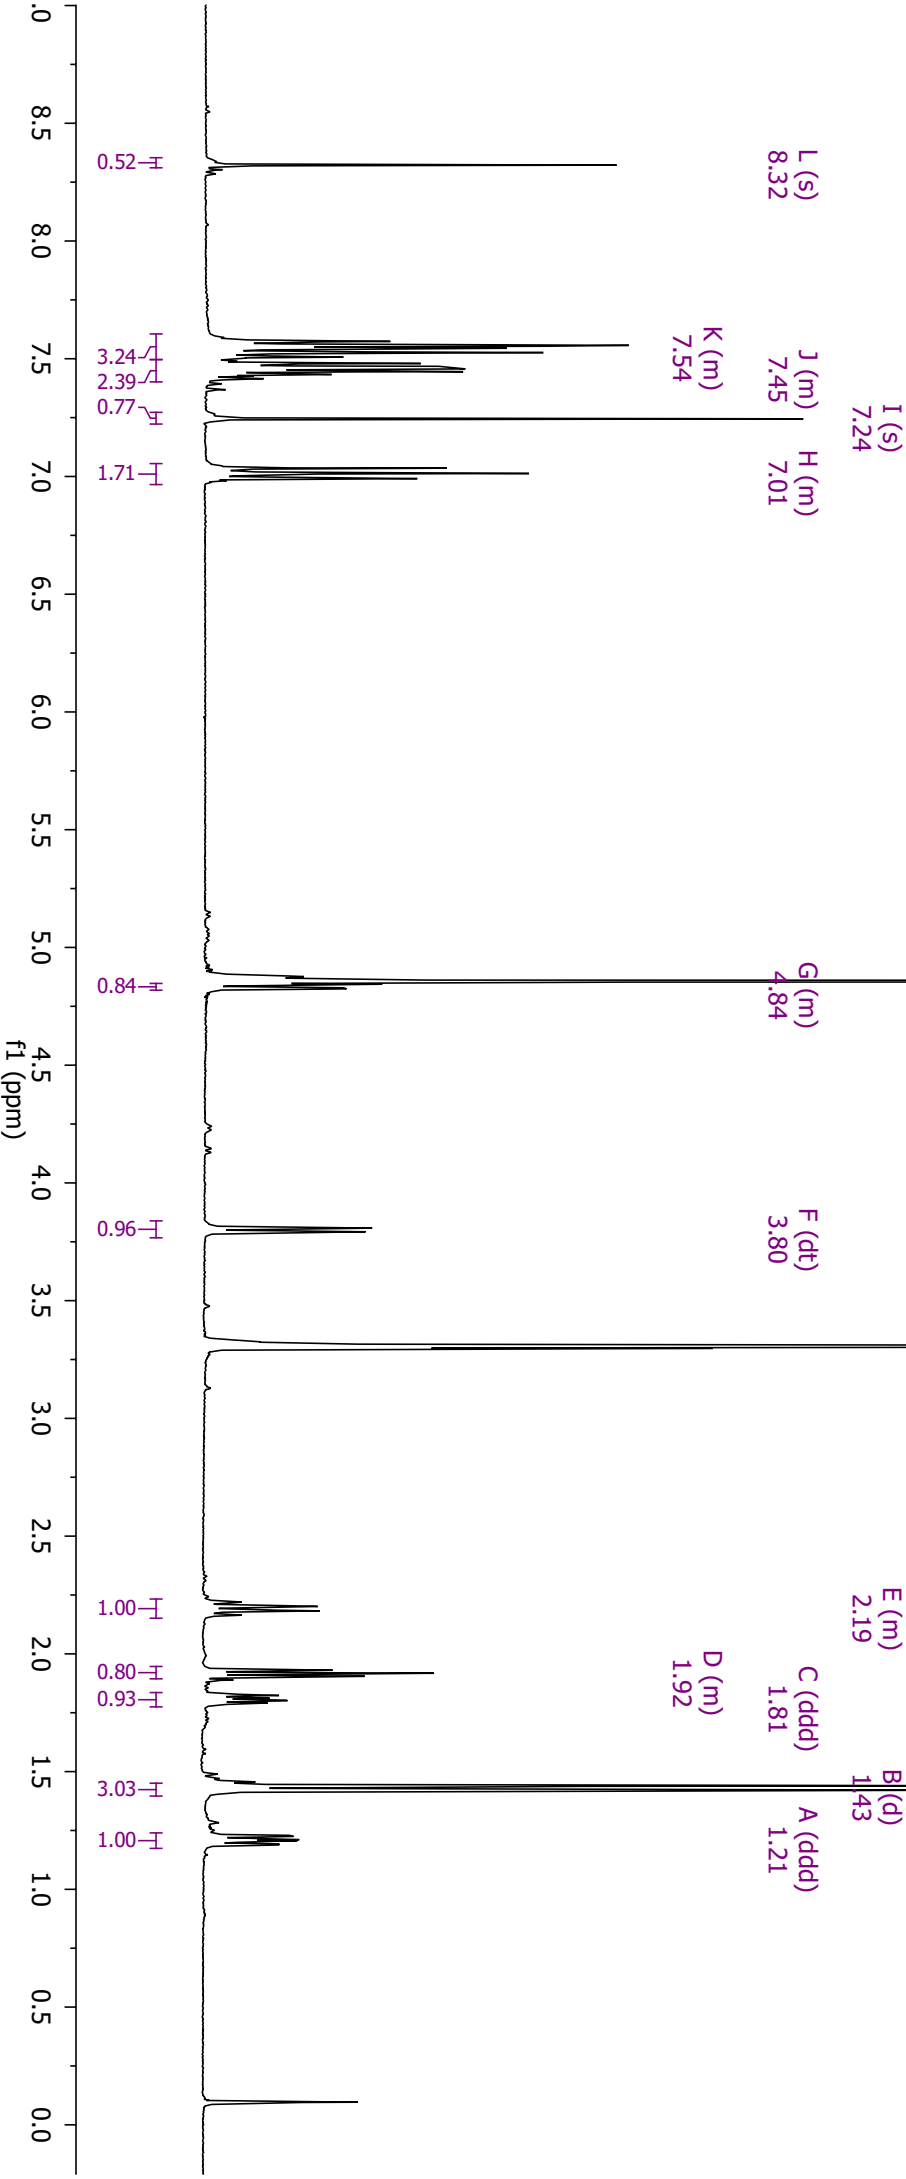

## F NMR: Compound 38b

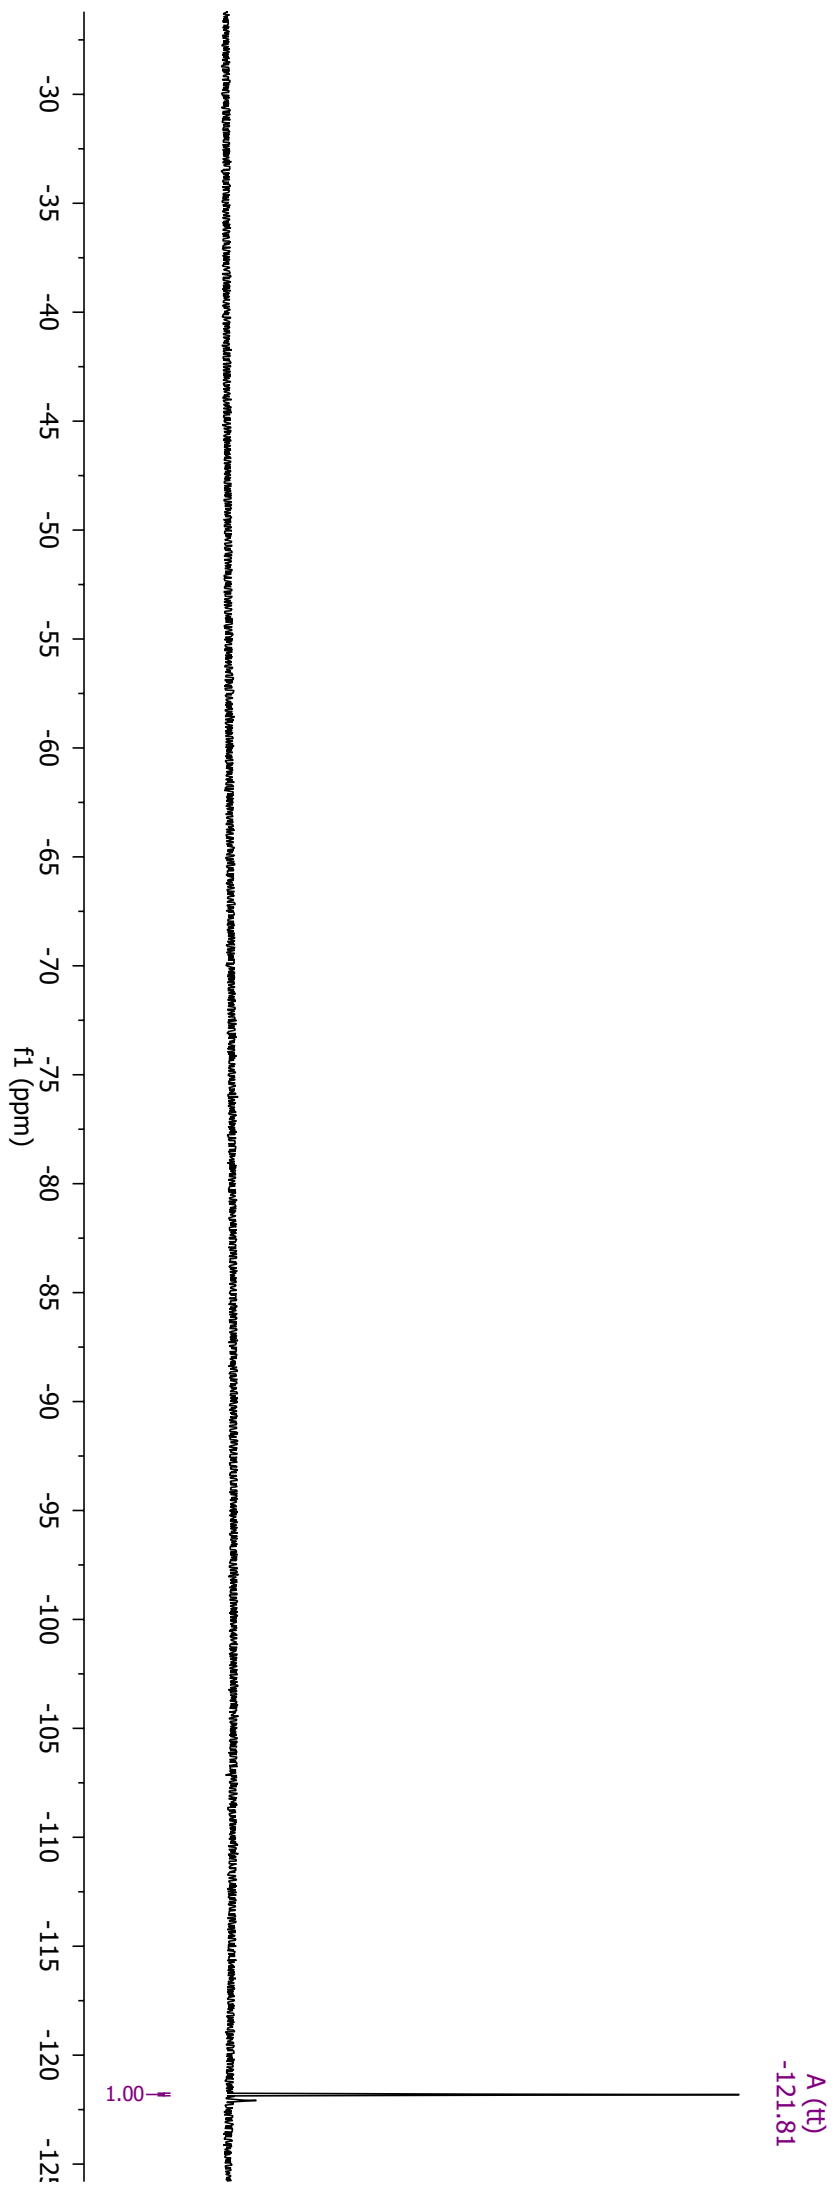

Single Mass Analysis

Tolerance = 10.0 mDa / DBE: min = -2.0, max = 1000.0  
 Element prediction: Off  
 Number of isotope peaks used for i-FIT = 3

Monoisotopic Mass, Even Electron Ions  
 79 formula(e) evaluated with 3 results within limits (up to 19 closest results for each mass)

Elements Used:  
 C: 0-120 H: 0-200 N: 4-4 O: 0-29 F: 1-1

28-Mar-2016  
 kst-28mar16-2-020 132 (2.442) Cn (Gen.5, 50.00, Ar); Sm (SG, 1x2.00); Sb (12.5,00)

TOF MS ES+  
 2.81e+003

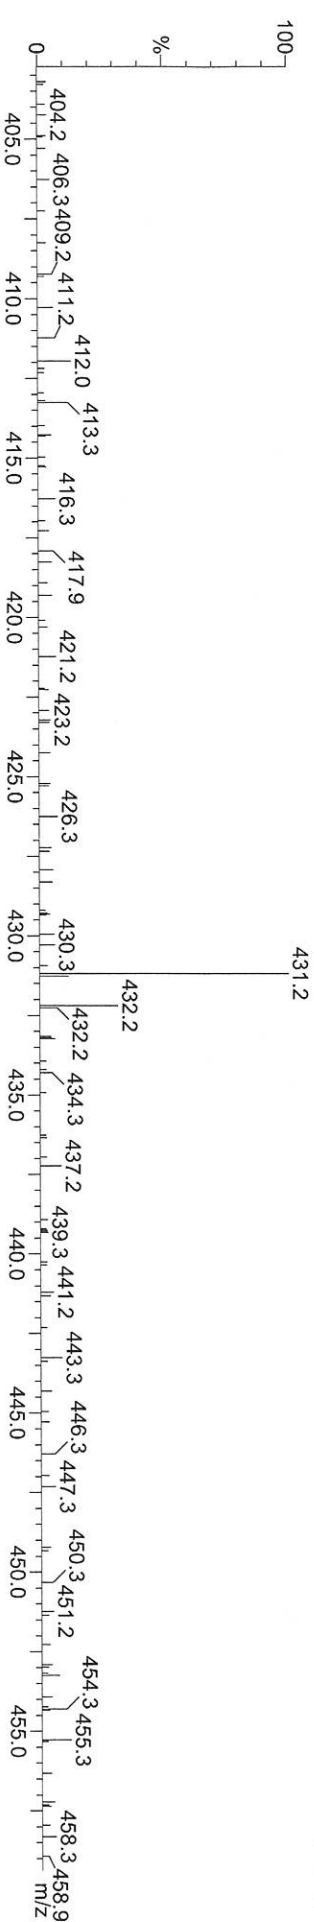

Minimum: 10.0  
 Maximum: 10.0  
 -2.0  
 1000.0

| Mass     | Calc. Mass | mDa  | PPM   | DBE  | i-FIT | Formula          |
|----------|------------|------|-------|------|-------|------------------|
| 431.1881 | 431.1883   | -0.2 | -0.5  | 15.5 | 1.3   | C25 H24 N4 O2 F  |
|          | 431.1942   | -6.1 | -14.1 | 6.5  | 33.9  | C18 H28 N4 O7 F  |
|          | 431.1789   | 9.2  | 21.3  | 2.5  | 81.1  | C14 H28 N4 O10 F |

Sample Name: MRS4377

S44

=====

|                                       |                        |
|---------------------------------------|------------------------|
| Acq. Operator : SYSTEM                | Seq. Line : 2          |
| Acq. Instrument : HPLC-001            | Location : 2           |
| Injection Date : 3/28/2016 1:42:29 PM | Inj : 1                |
|                                       | Inj Volume : 10.000 µl |

Acq. Method : D:\Chem32\1\Data\KIRAN\New 2016-03-28 13-15-11\ANAL\_A50-100\_D50-00\_15MIN.M  
Last changed : 3/28/2016 1:15:11 PM by SYSTEM  
Analysis Method : D:\Chem32\1\Data\KIRAN\New 2016-03-28 13-15-11\ANAL\_A50-100\_D50-00\_15MIN.M  
(Sequence Method)  
Last changed : 3/28/2016 2:31:40 PM by SYSTEM  
(modified after loading)  
Additional Info : Peak(s) manually integrated

=====

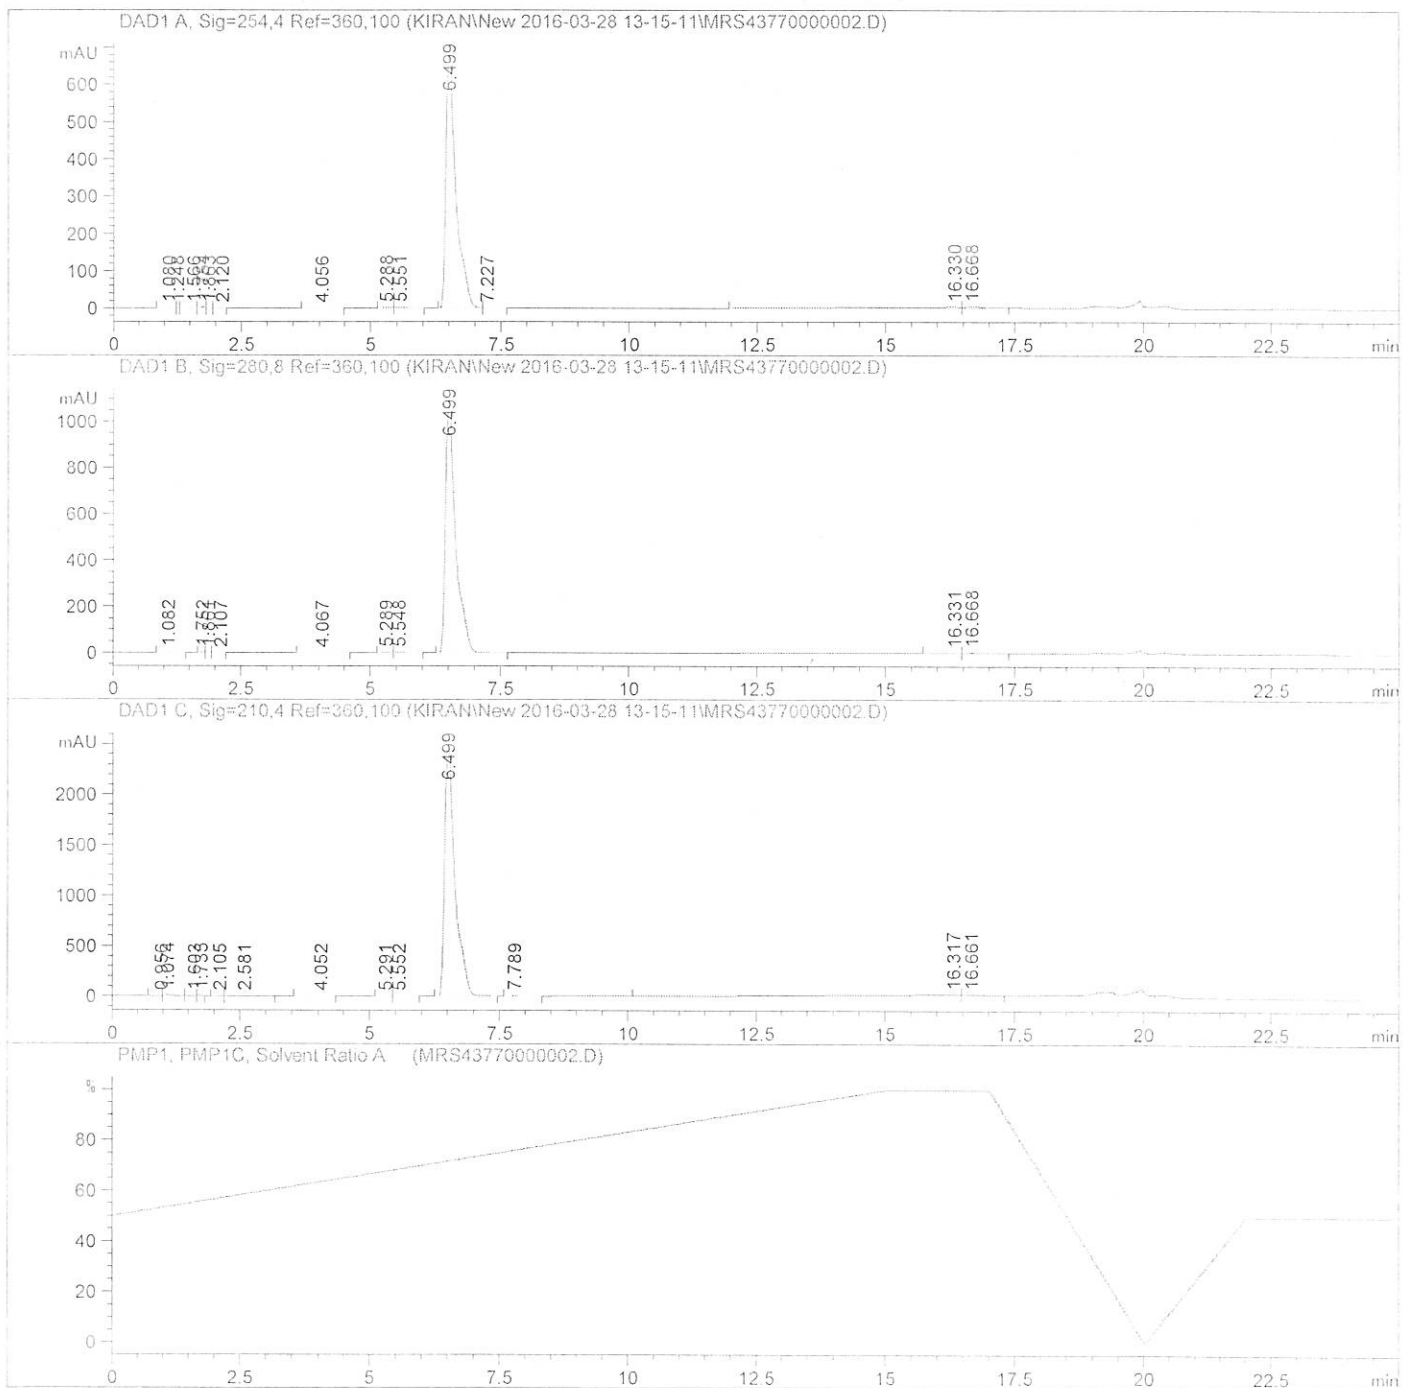

Sample Name: MRS4377

S45

```

=====
Acq. Operator   : SYSTEM                      Seq. Line :    2
Acq. Instrument : HPLC-001                    Location  :    2
Injection Date  : 3/28/2016 1:42:29 PM        Inj       :    1
                                           Inj Volume: 10.000 µl
Acq. Method     : D:\Chem32\1\Data\KIRAN\New 2016-03-28 13-15-11\ANAL_A50-100_D50-00_15MIN.M
Last changed    : 3/28/2016 1:15:11 PM by SYSTEM
Analysis Method : D:\Chem32\1\Data\KIRAN\New 2016-03-28 13-15-11\ANAL_A50-100_D50-00_15MIN.M
                 (Sequence Method)
Last changed    : 3/28/2016 2:31:40 PM by SYSTEM
                 (modified after loading)
Additional Info  : Peak(s) manually integrated
=====

```

Signal 1: DAD1 A, Sig=254,4 Ref=360,100

| Peak # | RetTime [min] | Type | Width [min] | Area [mAU*s] | Height [mAU] | Area %  |
|--------|---------------|------|-------------|--------------|--------------|---------|
| 1      | 1.080         | BV   | 0.1362      | 12.33841     | 1.21812      | 0.1285  |
| 2      | 1.248         | VV   | 0.0579      | 1.97356      | 4.80871e-1   | 0.0205  |
| 3      | 1.566         | VV   | 0.2206      | 11.94476     | 7.01729e-1   | 0.1244  |
| 4      | 1.754         | VV   | 0.0722      | 18.90858     | 3.79072      | 0.1969  |
| 5      | 1.863         | VV   | 0.0712      | 4.34669      | 9.90358e-1   | 0.0453  |
| 6      | 2.120         | VV   | 0.1468      | 5.59086      | 5.49127e-1   | 0.0582  |
| 7      | 4.056         | BB   | 0.2552      | 7.72690      | 3.96821e-1   | 0.0804  |
| 8      | 5.288         | BV   | 0.1516      | 25.61704     | 2.54201      | 0.2667  |
| 9      | 5.551         | VB   | 0.1979      | 32.00481     | 2.36415      | 0.3332  |
| 10     | 6.499         | BV   | 0.1975      | 9152.18652   | 677.97644    | 95.2846 |
| 11     | 7.227         | VB   | 0.2075      | 9.54675      | 6.42037e-1   | 0.0994  |
| 12     | 16.330        | BV   | 1.5241      | 255.09123    | 1.97341      | 2.6558  |
| 13     | 16.668        | VB   | 0.2987      | 67.82568     | 2.94471      | 0.7061  |

Totals : 9605.10179 696.57050

Signal 2: DAD1 B, Sig=280,8 Ref=360,100

| Peak # | RetTime [min] | Type | Width [min] | Area [mAU*s] | Height [mAU] | Area %  |
|--------|---------------|------|-------------|--------------|--------------|---------|
| 1      | 1.082         | BB   | 0.1488      | 7.34831      | 6.76310e-1   | 0.0493  |
| 2      | 1.752         | BV   | 0.0617      | 7.58111      | 1.85446      | 0.0508  |
| 3      | 1.861         | VV   | 0.0673      | 1.71600      | 4.23582e-1   | 0.0115  |
| 4      | 2.107         | VV   | 0.1276      | 3.04192      | 3.06993e-1   | 0.0204  |
| 5      | 4.067         | BB   | 0.2550      | 7.81479      | 4.05261e-1   | 0.0524  |
| 6      | 5.289         | BV   | 0.1546      | 21.79816     | 2.14364      | 0.1461  |
| 7      | 5.548         | VB   | 0.1933      | 21.23089     | 1.59540      | 0.1423  |
| 8      | 6.499         | BB   | 0.1979      | 1.47441e4    | 1089.60168   | 98.8435 |
| 9      | 16.331        | BV   | 0.4889      | 54.32557     | 1.36326      | 0.3642  |
| 10     | 16.668        | VB   | 0.3060      | 47.65012     | 2.01392      | 0.3194  |

Totals : 1.49166e4 1100.38452

H NMR: Compound 38c

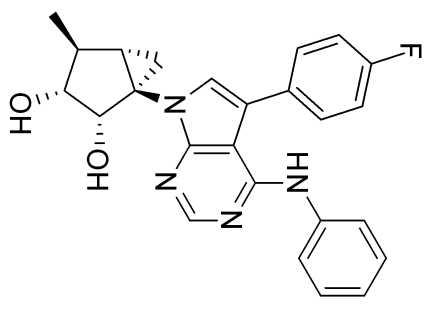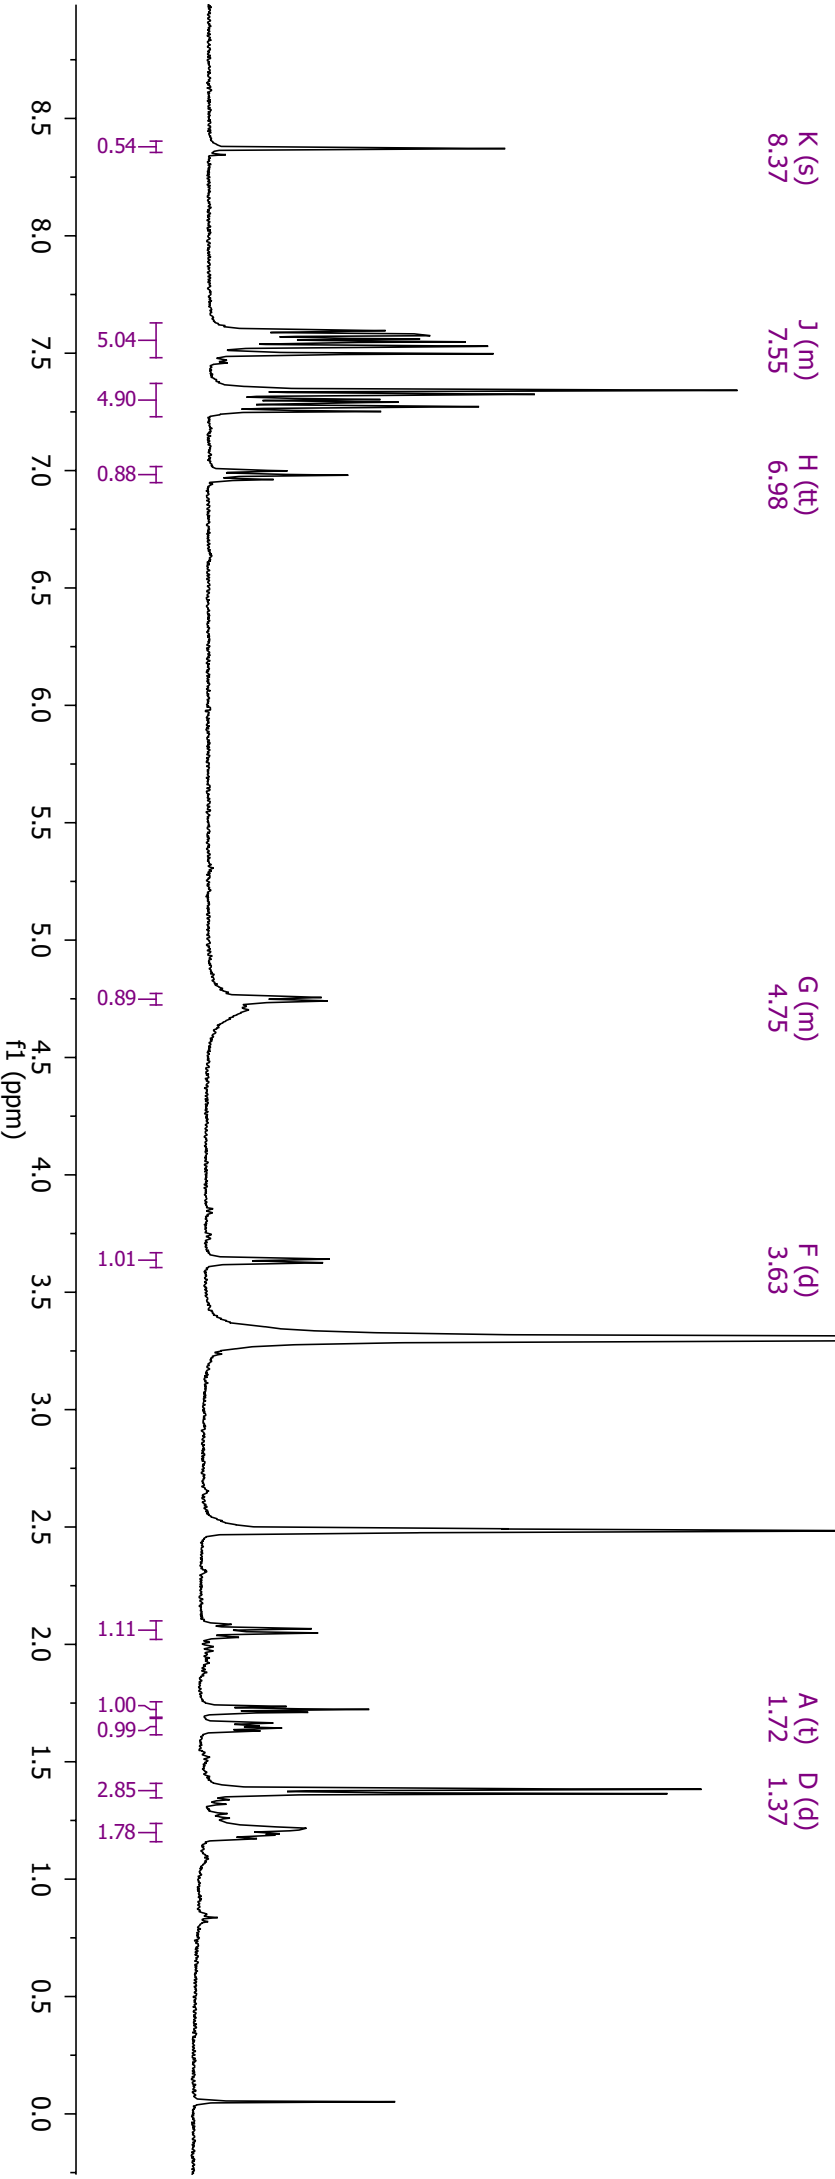

## F NMR: Compound 38c

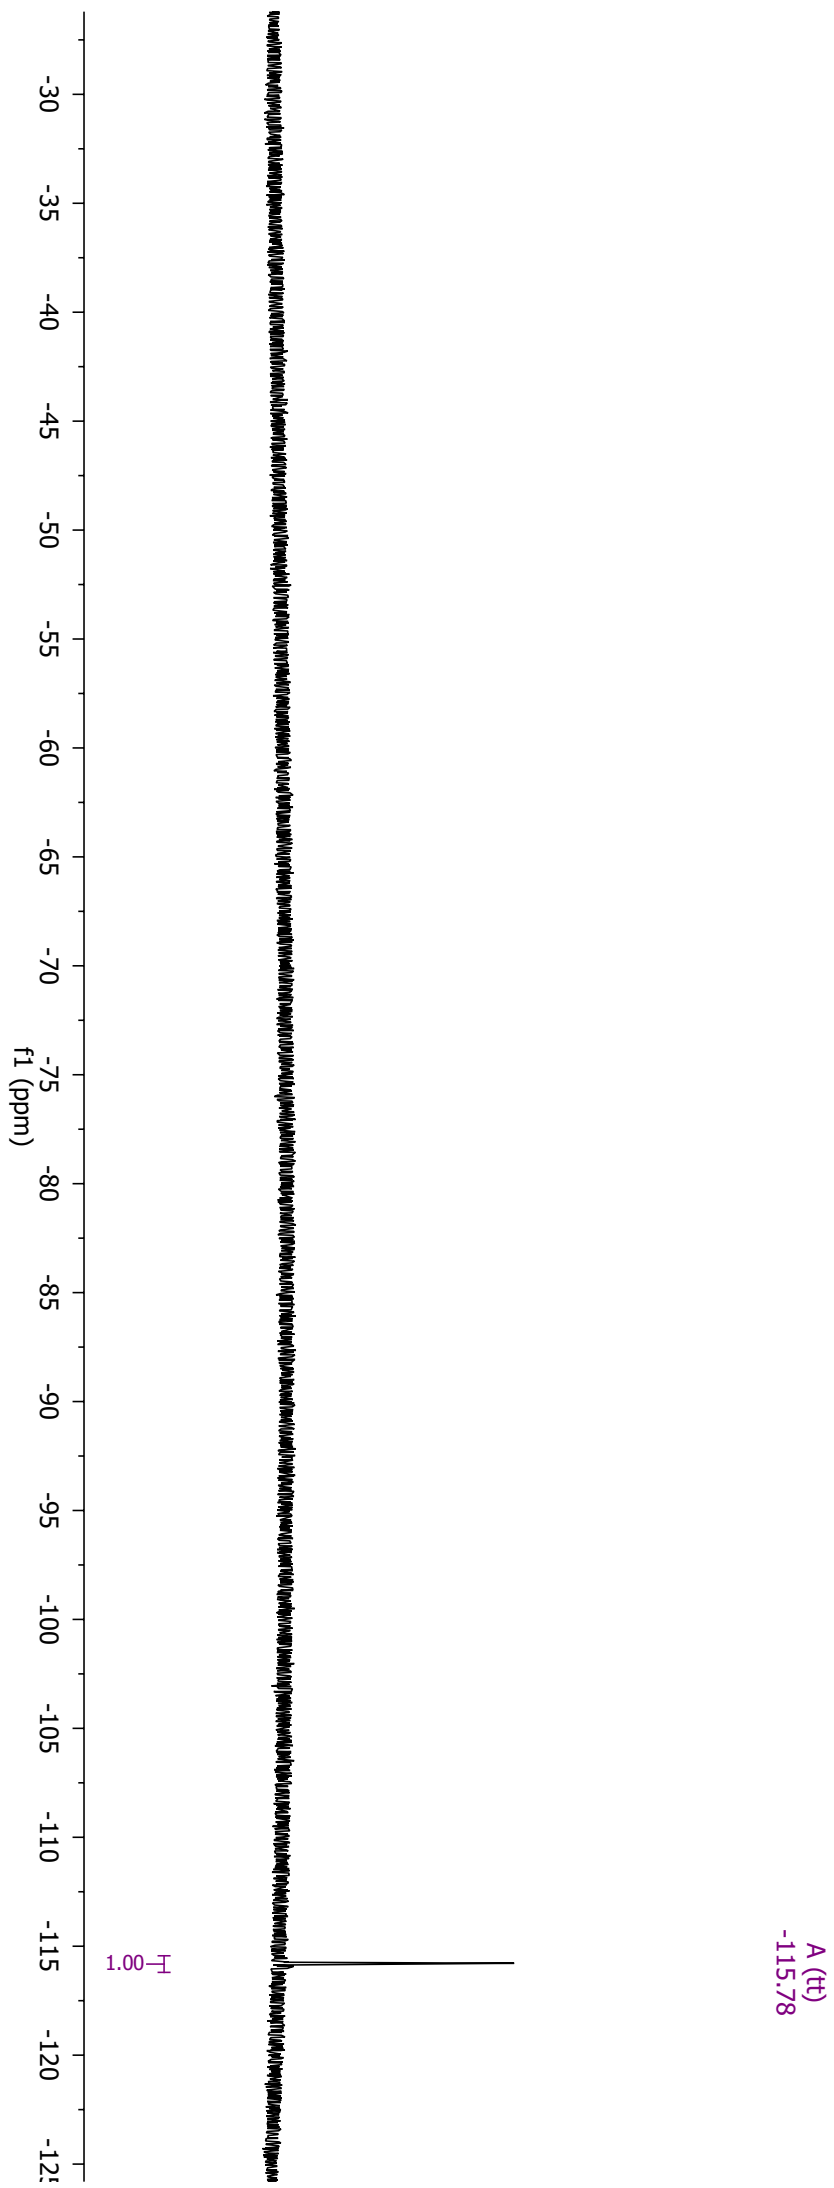

Single Mass Analysis

Tolerance = 10.0 mDa / DBE: min = -2.0, max = 1000.0  
 Element prediction: Off  
 Number of isotope peaks used for i-FIT = 3

Monoisotopic Mass, Even Electron Ions  
 79 formula(e) evaluated with 3 results within limits (up to 19 closest results for each mass)

Elements Used:  
 C: 0-100 H: 0-200 N: 4-4 O: 0-30 F: 1-1

22-Mar-2016  
 kst-22mar16-2-022-a 134 (2.478) Cn (Cen, 5, 50.00, Ar); Sm (SG, 1x2.00); Sb (12.5.00)

TOF MS ES+  
 4.83e+003

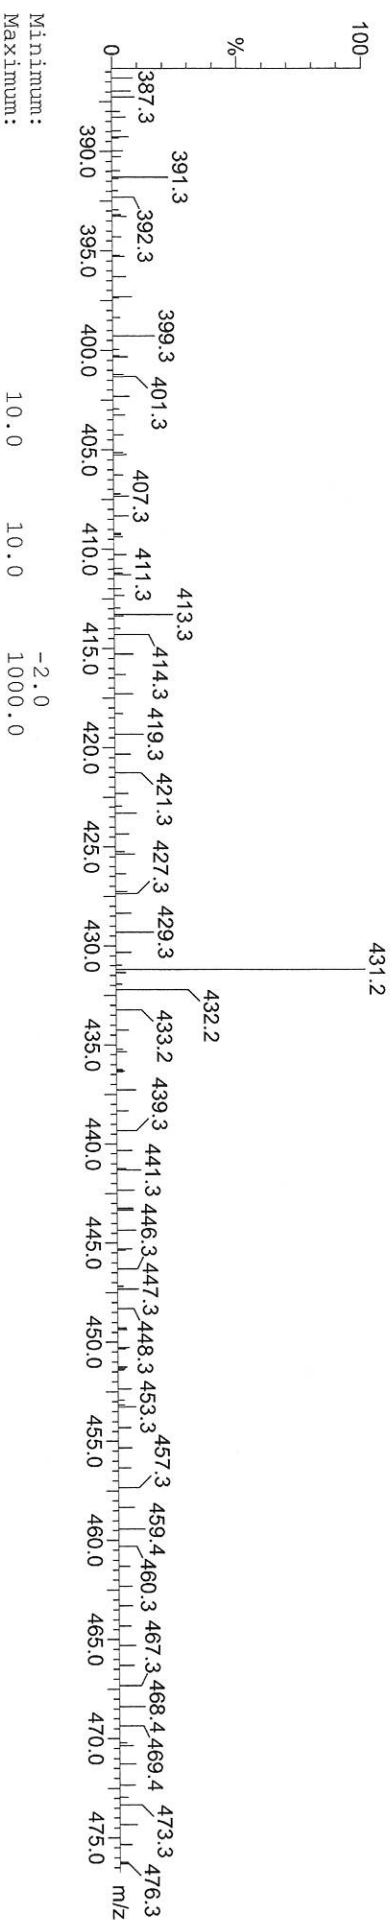

| Mass     | Calc. Mass | mDa  | PPM   | DBE  | i-FIT | Formula          |
|----------|------------|------|-------|------|-------|------------------|
| 431.1887 | 431.1883   | 0.4  | 0.9   | 15.5 | 72.6  | C25 H24 N4 O2 F  |
|          | 431.1942   | -5.5 | -12.8 | 6.5  | 117.2 | C18 H28 N4 O7 F  |
|          | 431.1789   | 9.8  | 22.7  | 2.5  | 201.9 | C14 H28 N4 O10 F |

Minimum: 10.0  
 Maximum: 10.0  
 -2.0  
 1000.0



Sample Name: MRS4378

S49

```

=====
Acq. Operator   : SYSTEM                      Seq. Line :    2
Acq. Instrument : HPLC-001                   Location  :    2
Injection Date  : 4/12/2016 1:55:53 PM      Inj       :    1
                                           Inj Volume: 10.000 µl

Acq. Method     : D:\Chem32\1\Data\KIRAN\New 2016-04-12 13-23-54\WASH_00_100_30min.M
Last changed    : 4/12/2016 1:23:54 PM by SYSTEM
Analysis Method : D:\Chem32\1\Data\KIRAN\New 2016-04-12 13-23-54\WASH_00_100_30min.M (
Sequence Method)
Last changed    : 4/12/2016 2:38:47 PM by SYSTEM
                 (modified after loading)
Additional Info  : Peak(s) manually integrated
=====
    
```

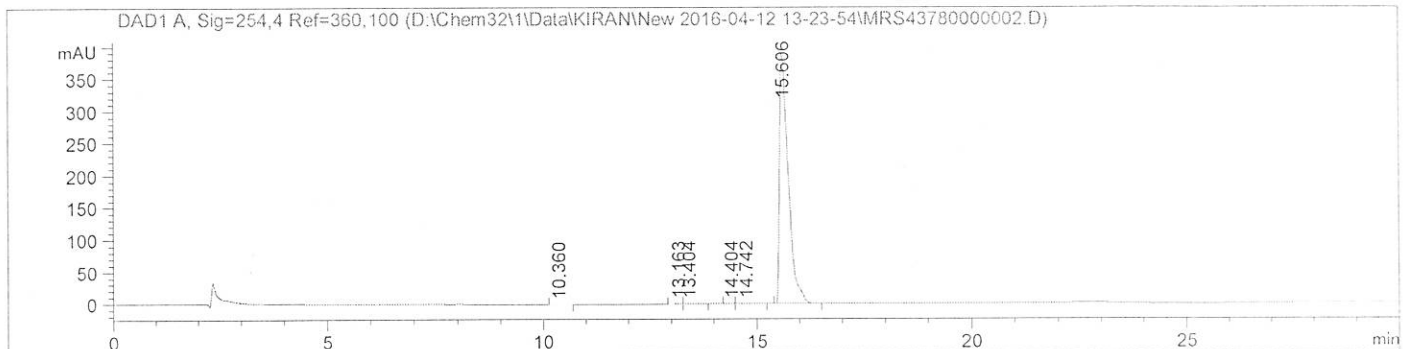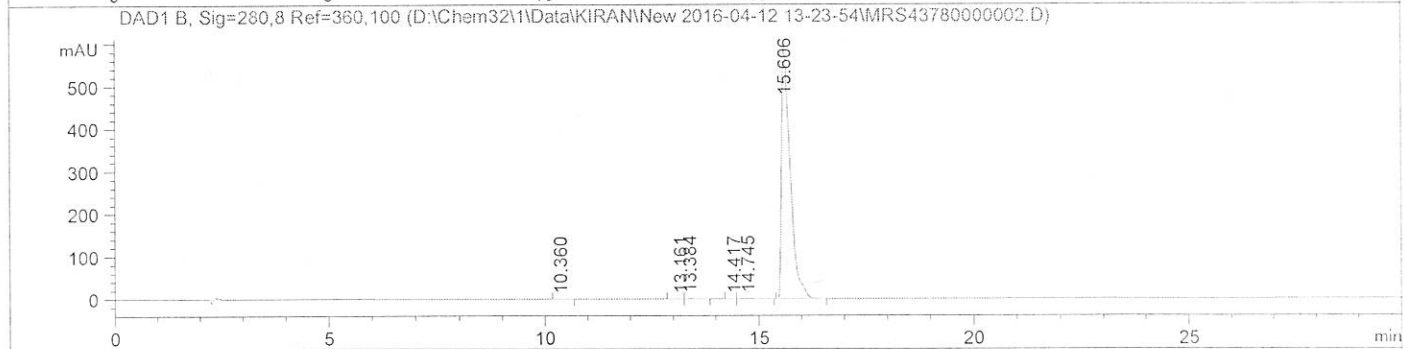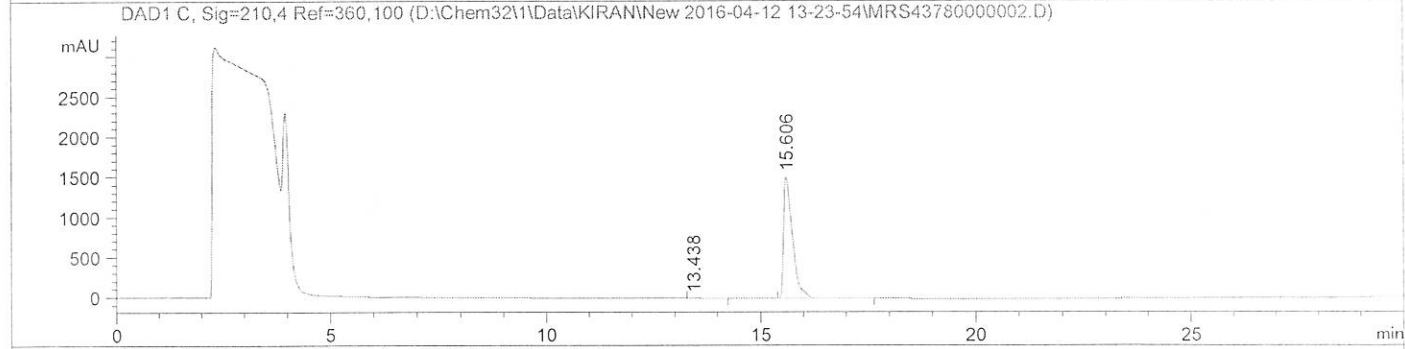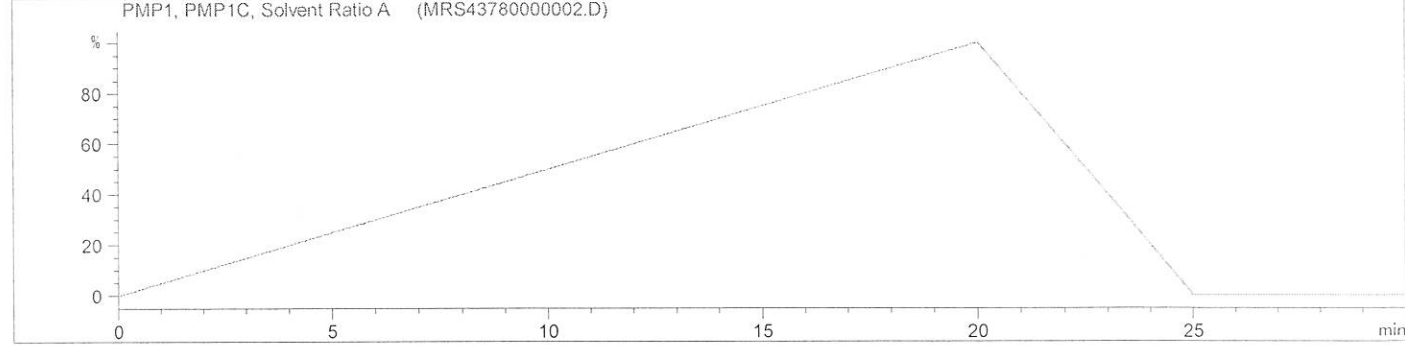

Sample Name: MRS4378

S50

```

=====
Acq. Operator   : SYSTEM                      Seq. Line :    2
Acq. Instrument : HPLC-001                   Location  :    2
Injection Date  : 4/12/2016 1:55:53 PM      Inj       :    1
                                           Inj Volume: 10.000 µl
Acq. Method     : D:\Chem32\1\Data\KIRAN\New 2016-04-12 13-23-54\WASH_00_100_30min.M
Last changed    : 4/12/2016 1:23:54 PM by SYSTEM
Analysis Method : D:\Chem32\1\Data\KIRAN\New 2016-04-12 13-23-54\WASH_00_100_30min.M (
                  Sequence Method)
Last changed    : 4/12/2016 2:38:47 PM by SYSTEM
                  (modified after loading)
Additional Info  : Peak(s) manually integrated
=====

```

Signal 1: DAD1 A, Sig=254,4 Ref=360,100

| Peak # | RetTime [min] | Type | Width [min] | Area [mAU*s] | Height [mAU] | Area %  |
|--------|---------------|------|-------------|--------------|--------------|---------|
| 1      | 10.360        | BB   | 0.2613      | 3.02682      | 1.67091e-1   | 0.0536  |
| 2      | 13.163        | BV   | 0.1737      | 2.59097      | 2.22715e-1   | 0.0459  |
| 3      | 13.404        | VB   | 0.2569      | 8.46525      | 4.59634e-1   | 0.1500  |
| 4      | 14.404        | BV   | 0.1536      | 3.41462      | 3.38668e-1   | 0.0605  |
| 5      | 14.742        | VB   | 0.2678      | 17.57603     | 8.84509e-1   | 0.3115  |
| 6      | 15.606        | BB   | 0.2095      | 5607.11035   | 390.65805    | 99.3784 |

Totals : 5642.18405 392.73067

Signal 2: DAD1 B, Sig=280,8 Ref=360,100

| Peak # | RetTime [min] | Type | Width [min] | Area [mAU*s] | Height [mAU] | Area %   |
|--------|---------------|------|-------------|--------------|--------------|----------|
| 1      | 10.360        | BB   | 0.1989      | 7.48898e-1   | 4.93802e-2   | 8.896e-3 |
| 2      | 13.161        | BV   | 0.1784      | 3.14890      | 2.58025e-1   | 0.0374   |
| 3      | 13.384        | VB   | 0.2254      | 8.71139      | 5.42391e-1   | 0.1035   |
| 4      | 14.417        | BV   | 0.1416      | 9.39508e-1   | 9.82482e-2   | 0.0112   |
| 5      | 14.745        | VB   | 0.2548      | 13.31102     | 7.09791e-1   | 0.1581   |
| 6      | 15.606        | BB   | 0.2096      | 8391.75293   | 584.11365    | 99.6809  |

Totals : 8418.61265 585.77148

Signal 3: DAD1 C, Sig=210,4 Ref=360,100

| Peak # | RetTime [min] | Type | Width [min] | Area [mAU*s] | Height [mAU] | Area %  |
|--------|---------------|------|-------------|--------------|--------------|---------|
| 1      | 13.438        | VV   | 0.2752      | 21.35071     | 1.20201      | 0.0976  |
| 2      | 15.606        | VB   | 0.2106      | 2.18547e4    | 1512.45642   | 99.9024 |

Totals : 2.18760e4 1513.65843

## H NMR: Compound 43

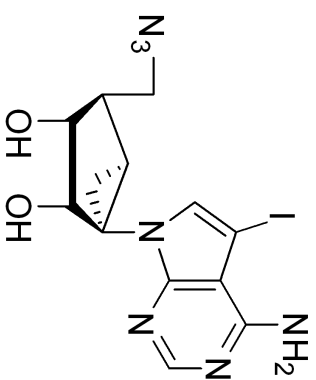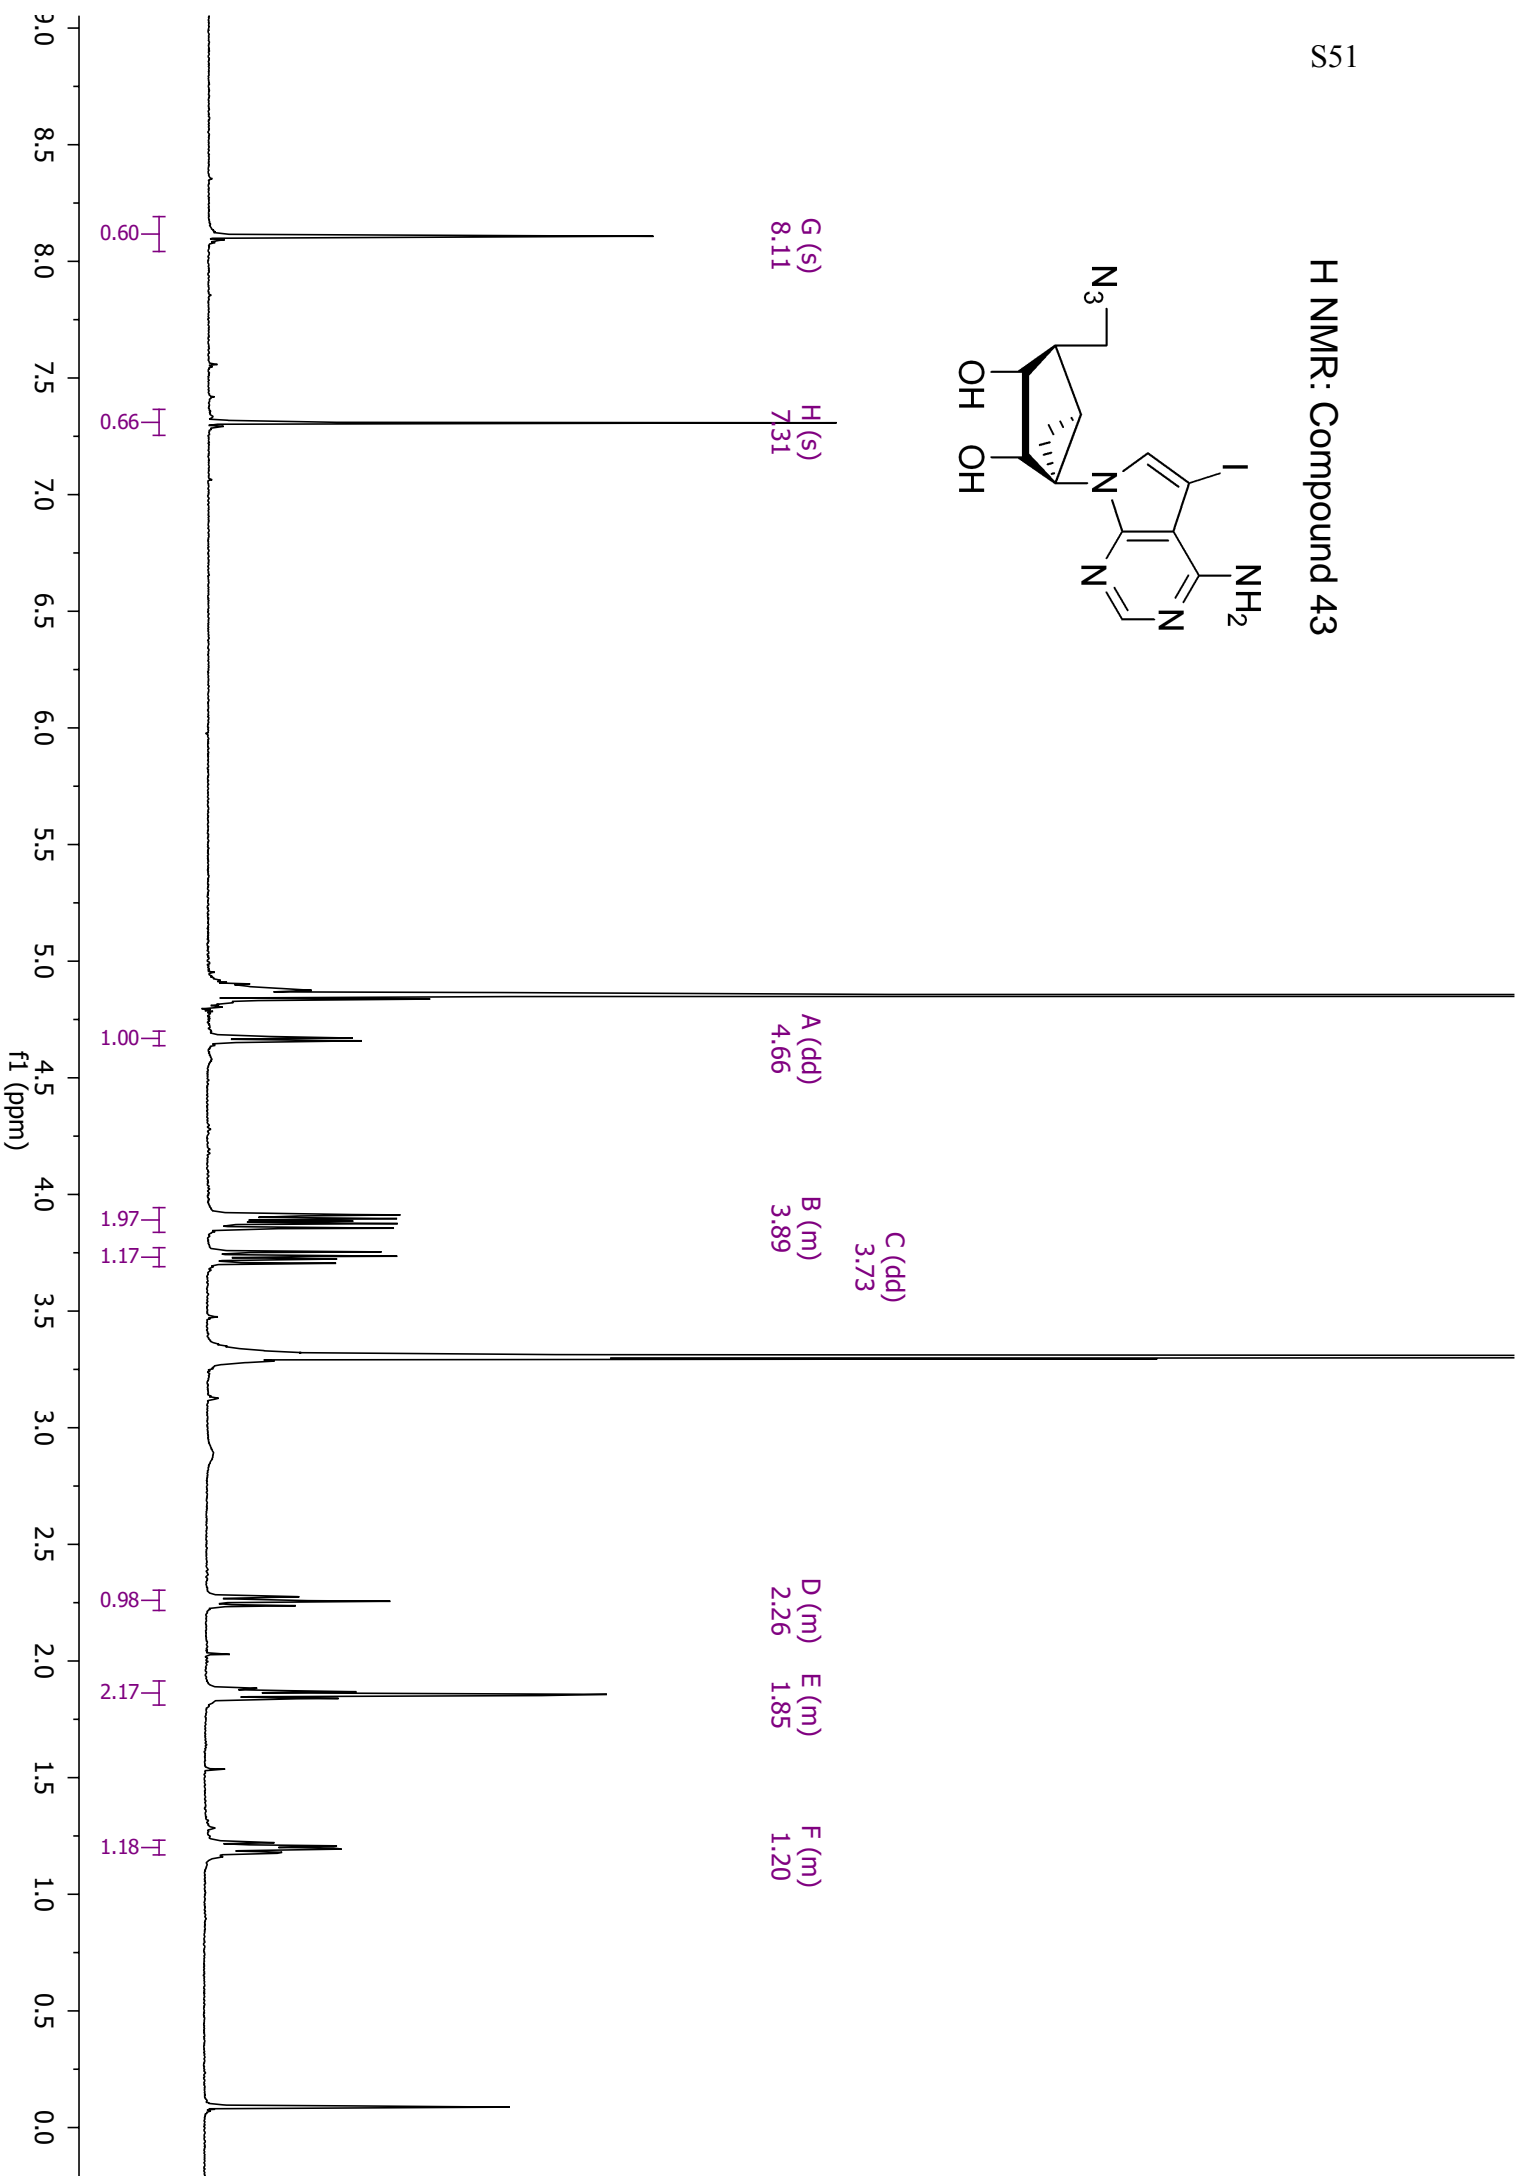

**Single Mass Analysis**

Tolerance = 10.0 mDa / DBE: min = -50.0, max = 500.0

Element prediction: Off

Number of isotope peaks used for i-FIT = 3

Monoisotopic Mass, Even Electron Ions

103 formula(e) evaluated with 3 results within limits (up to 19 closest results for each mass)

Elements Used:

C: 0-100 H: 0-200 N: 7-7 O: 0-30 I: 1-1

16-Apr-2015  
 ket-16apr15-1096 145 (2.681) Cn (Cen.5, 50.00, Ar); Sm (SG, 3x5.00); Sb (12.5.00)

TOF MS ES+  
 1.17e+003

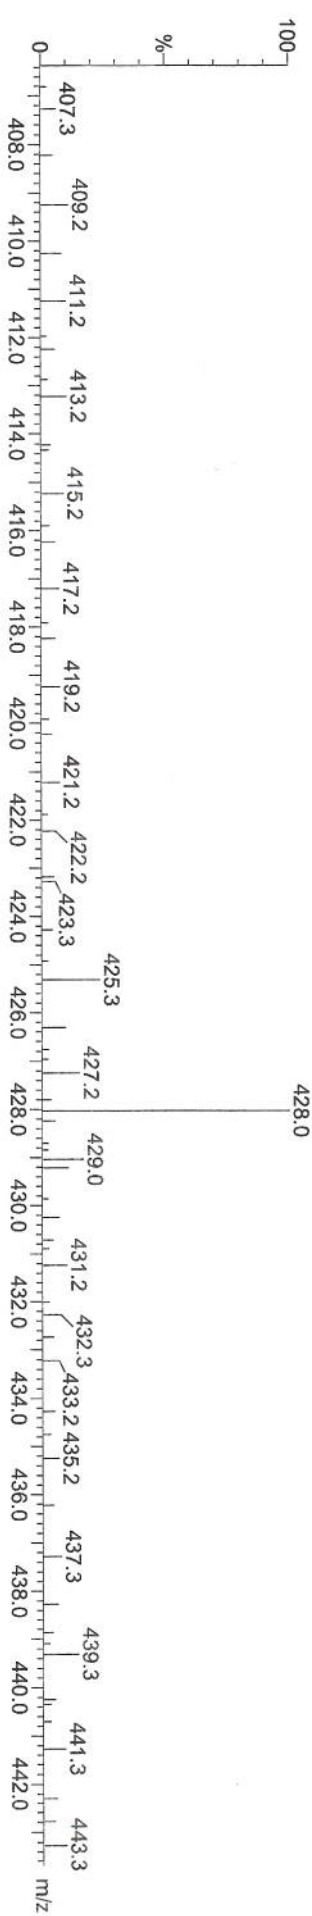

Minimum: 10.0  
 Maximum: 10.0  
 -50.0  
 500.0

| Mass     | Calc. Mass | mDa  | PPM   | DBE  | i-FIT | Formula         |
|----------|------------|------|-------|------|-------|-----------------|
| 428.0336 | 428.0332   | 0.4  | 0.9   | 9.5  | 11.7  | C13 H15 N7 O2 I |
|          | 428.0391   | -5.5 | -12.8 | 0.5  | 26.9  | C6 H19 N7 O7 I  |
|          | 428.0238   | 9.8  | 22.9  | -3.5 | 54.6  | C2 H19 N7 O10 I |

=====  
Acq. Operator : KIRAN  
Acq. Instrument : Instrument 1 Location : Vial 1  
Injection Date : 9/15/2015 5:14:08 PM Inj : 1  
Inj Volume : 10.0 µl  
Acq. Method : C:\CHEM32\1\METHODS\KST0050.M  
Last changed : 9/15/2015 5:11:59 PM by KIRAN  
(modified after loading)  
Analysis Method : C:\CHEM32\1\METHODS\KST0050.M  
Last changed : 9/11/2015 5:21:48 PM by KIRAN  
Method Info : ESI neg

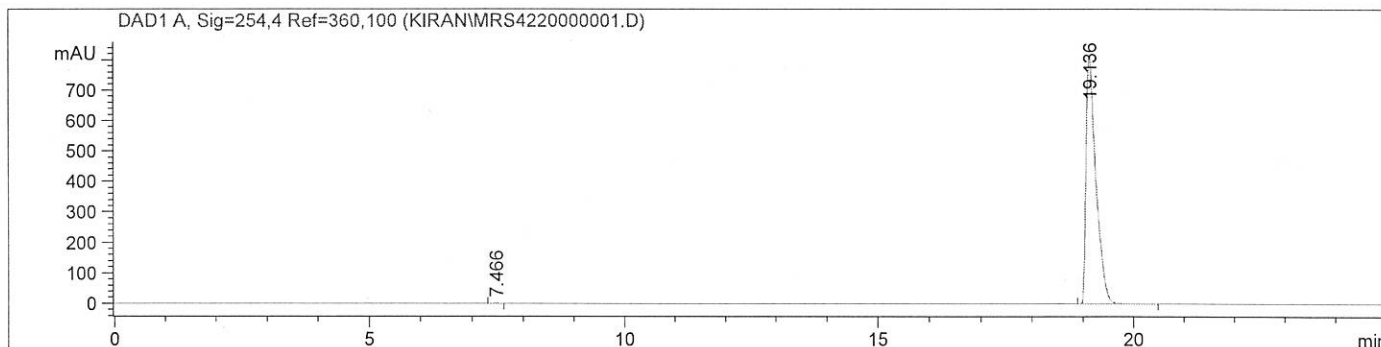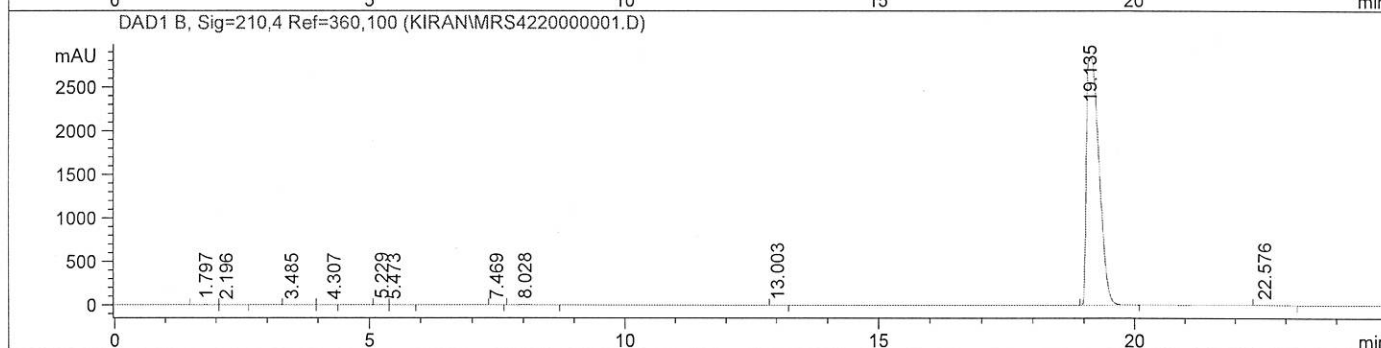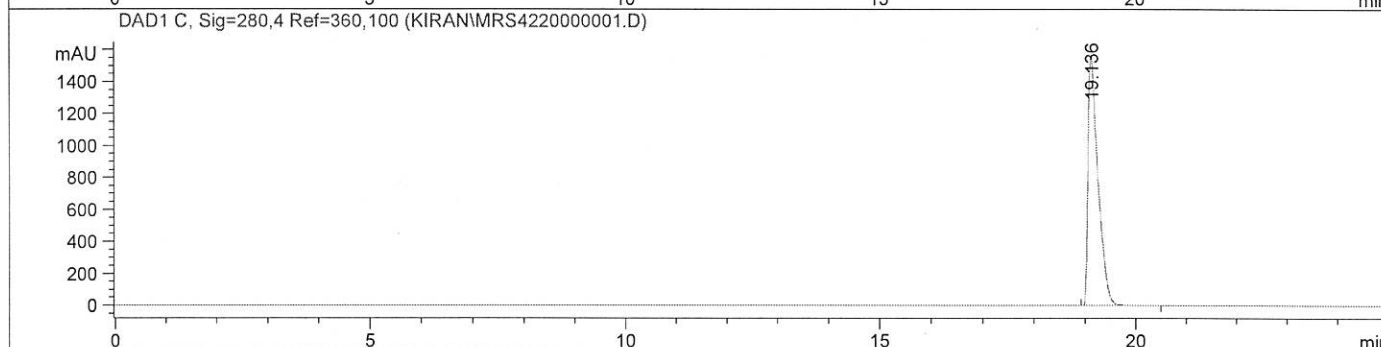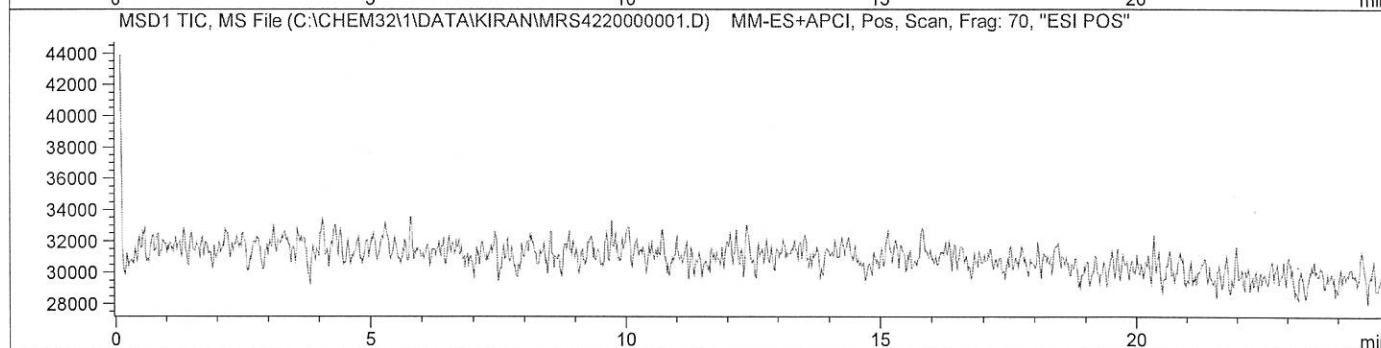

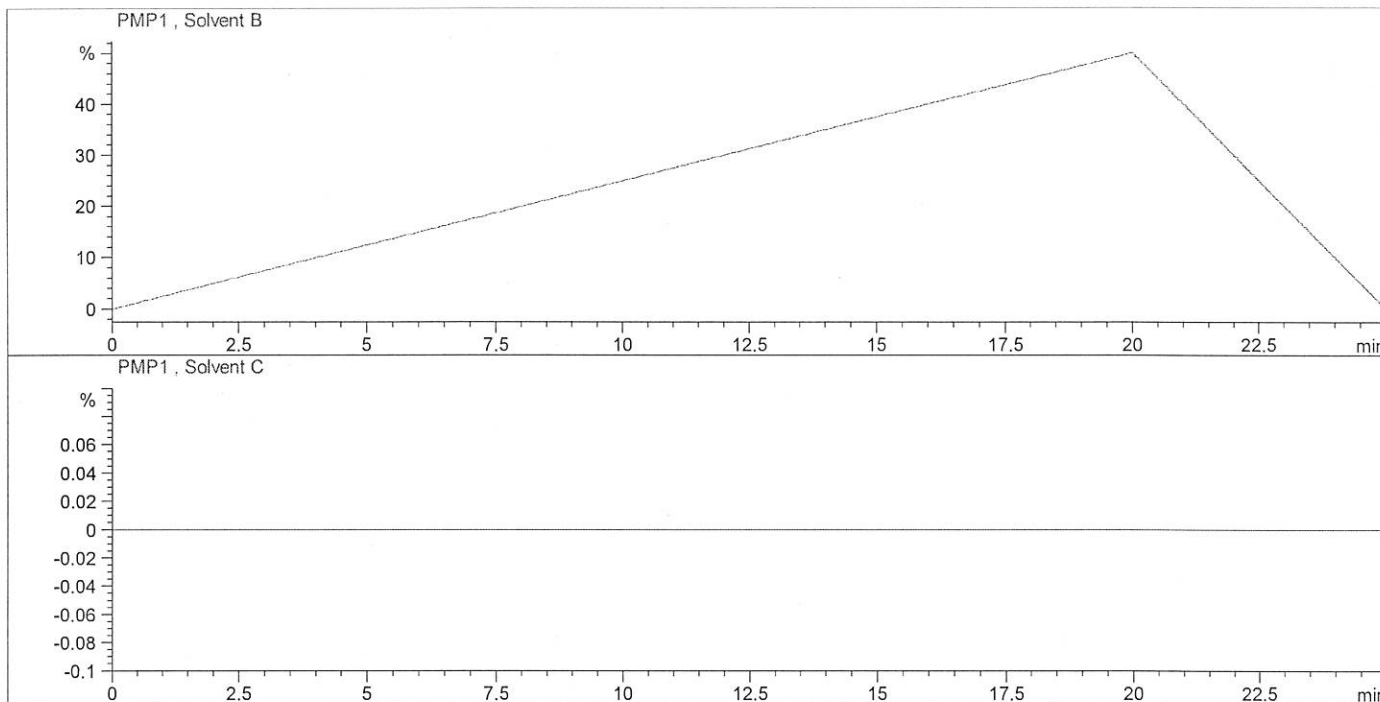

=====  
 Area Percent Report  
 =====

Sorted By : Signal  
 Multiplier : 1.0000  
 Dilution : 1.0000  
 Sample Amount: : 10.00000 [ng/ul] (not used in calc.)  
 Use Multiplier & Dilution Factor with ISTDs

Signal 1: DAD1 A, Sig=254,4 Ref=360,100

| Peak # | RetTime [min] | Type | Width [min] | Area [mAU*s] | Height [mAU] | Area %  |
|--------|---------------|------|-------------|--------------|--------------|---------|
| 1      | 7.466         | BB   | 0.1251      | 8.11424      | 1.03880      | 0.0741  |
| 2      | 19.136        | BB   | 0.1956      | 1.09376e4    | 819.89508    | 99.9259 |

Totals : 1.09457e4 820.93388

Signal 2: DAD1 B, Sig=210,4 Ref=360,100

| Peak # | RetTime [min] | Type | Width [min] | Area [mAU*s] | Height [mAU] | Area % |
|--------|---------------|------|-------------|--------------|--------------|--------|
| 1      | 1.797         | BV   | 0.1537      | 58.13491     | 5.66764      | 0.1186 |
| 2      | 2.196         | VB   | 0.2647      | 59.57635     | 2.98658      | 0.1216 |
| 3      | 3.485         | BB   | 0.2350      | 58.25634     | 3.38218      | 0.1189 |
| 4      | 4.307         | BB   | 0.1250      | 10.46638     | 1.12038      | 0.0214 |
| 5      | 5.229         | BV   | 0.1386      | 27.83371     | 3.16424      | 0.0568 |
| 6      | 5.473         | VB   | 0.1771      | 15.56353     | 1.25137      | 0.0318 |

## H NMR: Compound 45

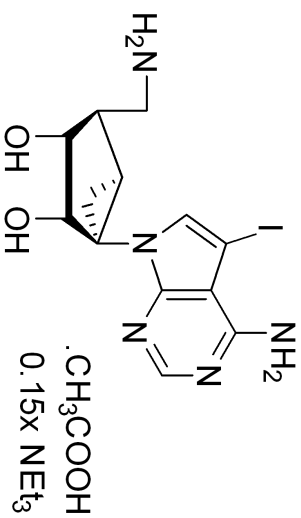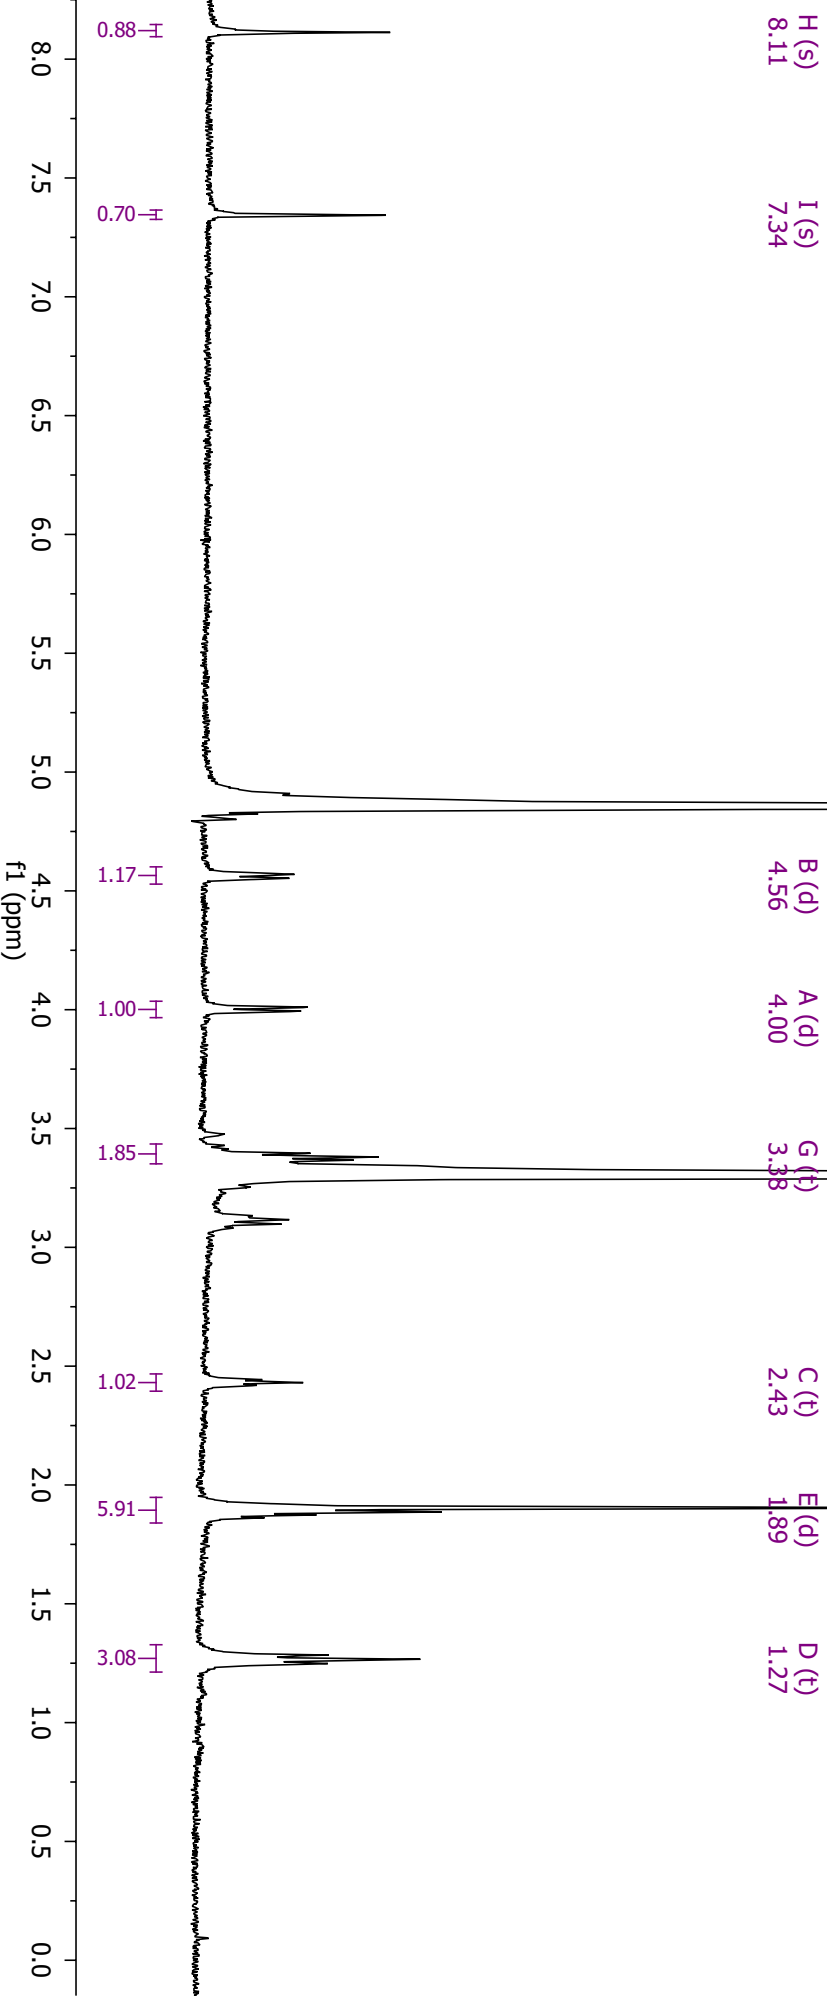

**Single Mass Analysis**

Tolerance = 10.0 mDa / DBE: min = -50.0, max = 500.0

Element prediction: Off

Number of isotope peaks used for i-FIT = 3

Monoisotopic Mass, Even Electron Ions

101 formula(e) evaluated with 3 results within limits (up to 19 closest results for each mass)

Elements Used:

C: 0-100 H: 0-200 N: 5-5 O: 0-30 I: 1-1

17-Apr-2015  
kst-17apr15-1098 382 (7.063) Cn (Cen, 5, 50.00, Ar); Sm (SG, 3x5.00); Sb (12.5.00)

TOF MS ES+  
2.37e+003

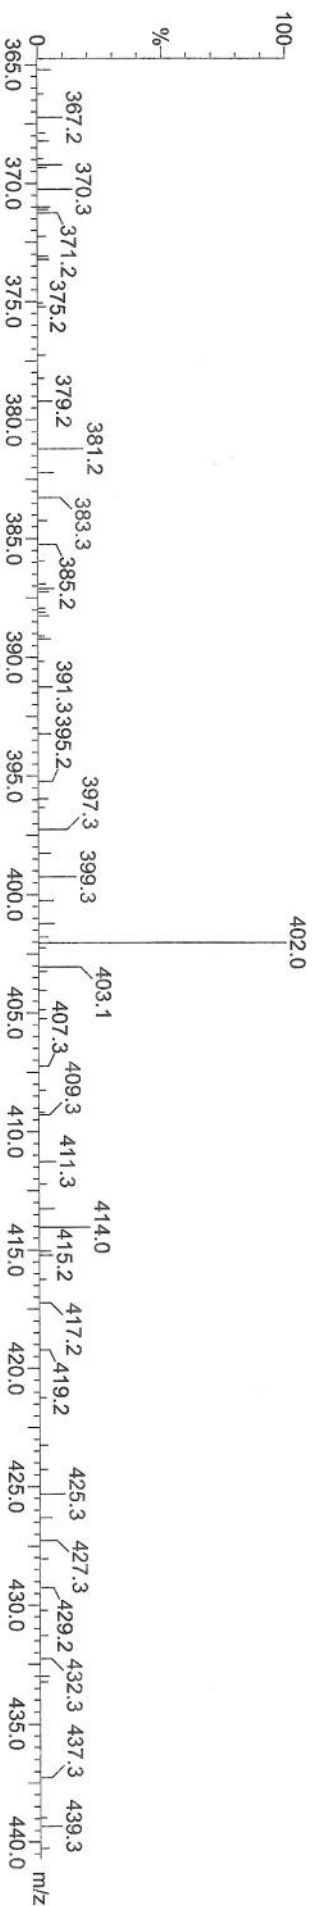

Minimum: 10.0 10.0 -50.0  
Maximum: 10.0 10.0 500.0

| Mass     | Calc. Mass | mDa  | PPM   | DBE  | i-FIT | Formula         |
|----------|------------|------|-------|------|-------|-----------------|
| 402.0421 | 402.0427   | -0.6 | -1.5  | 7.5  | 6.1   | C13 H17 N5 O2 I |
|          | 402.0486   | -6.5 | -16.2 | -1.5 | 42.4  | C6 H21 N5 O7 I  |
|          | 402.0333   | 8.8  | 21.9  | -5.5 | 103.2 | C2 H21 N5 O10 I |



=====

|                 |                        |            |                |
|-----------------|------------------------|------------|----------------|
| Acq. Operator   | : KIRAN                | Location   | : Vial 1       |
| Acq. Instrument | : Instrument 1         | Inj        | : 1            |
| Injection Date  | : 9/23/2015 1:35:01 PM | Inj Volume | : 10.0 $\mu$ l |

  

|                 |                                                             |
|-----------------|-------------------------------------------------------------|
| Acq. Method     | : C:\CHEM32\1\METHODS\KST0025.M                             |
| Last changed    | : 9/23/2015 1:33:24 PM by KIRAN<br>(modified after loading) |
| Analysis Method | : C:\CHEM32\1\METHODS\KST0050.M                             |
| Last changed    | : 9/11/2015 5:21:48 PM by KIRAN                             |
| Method Info     | : ESI neg                                                   |

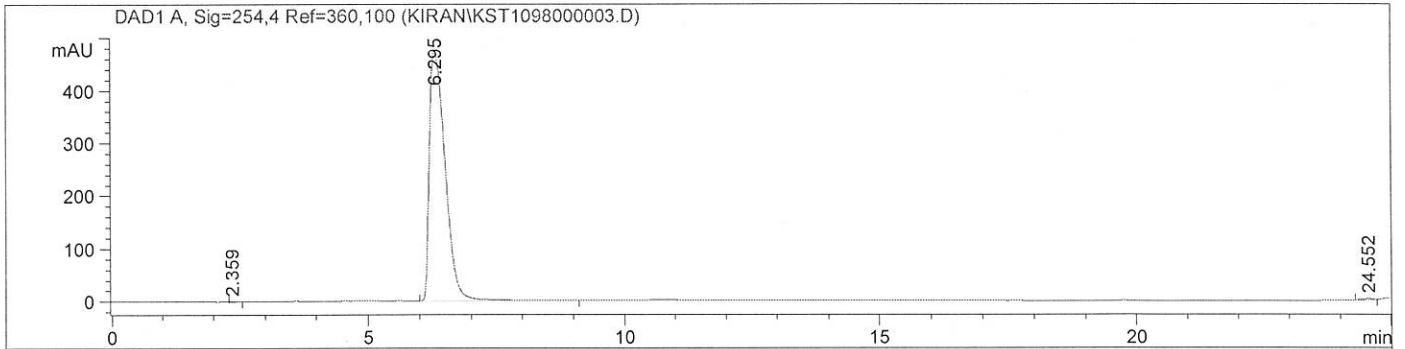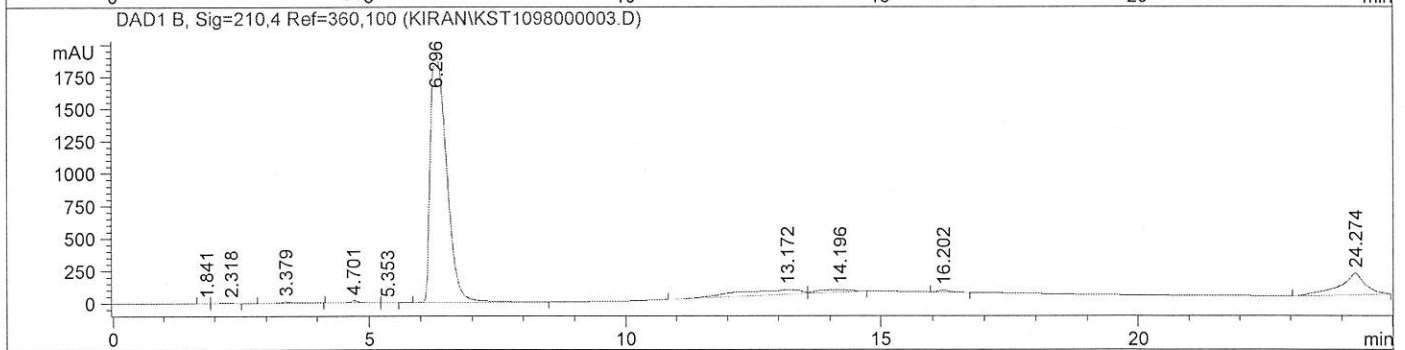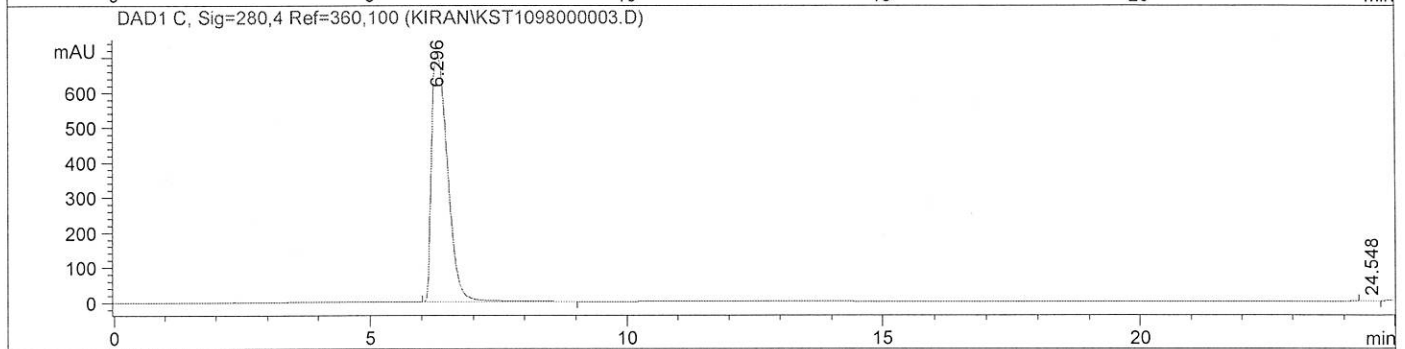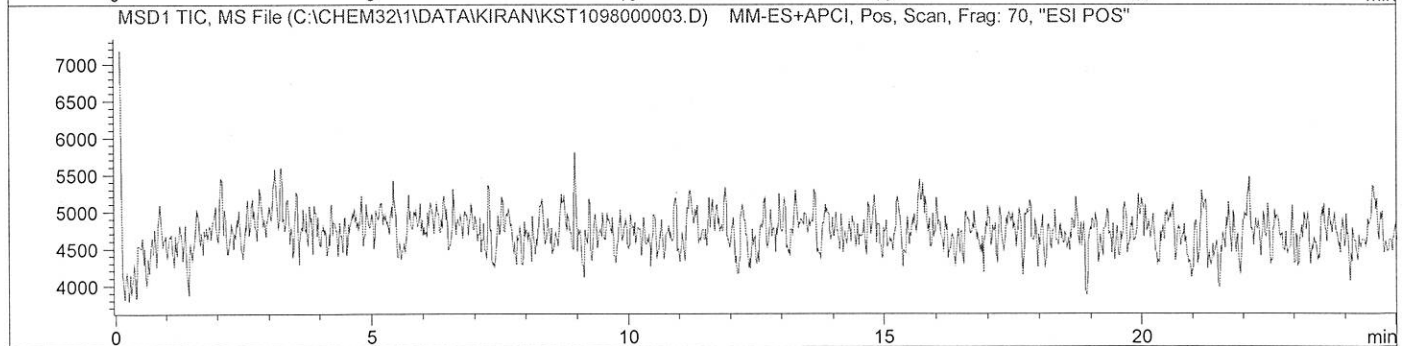

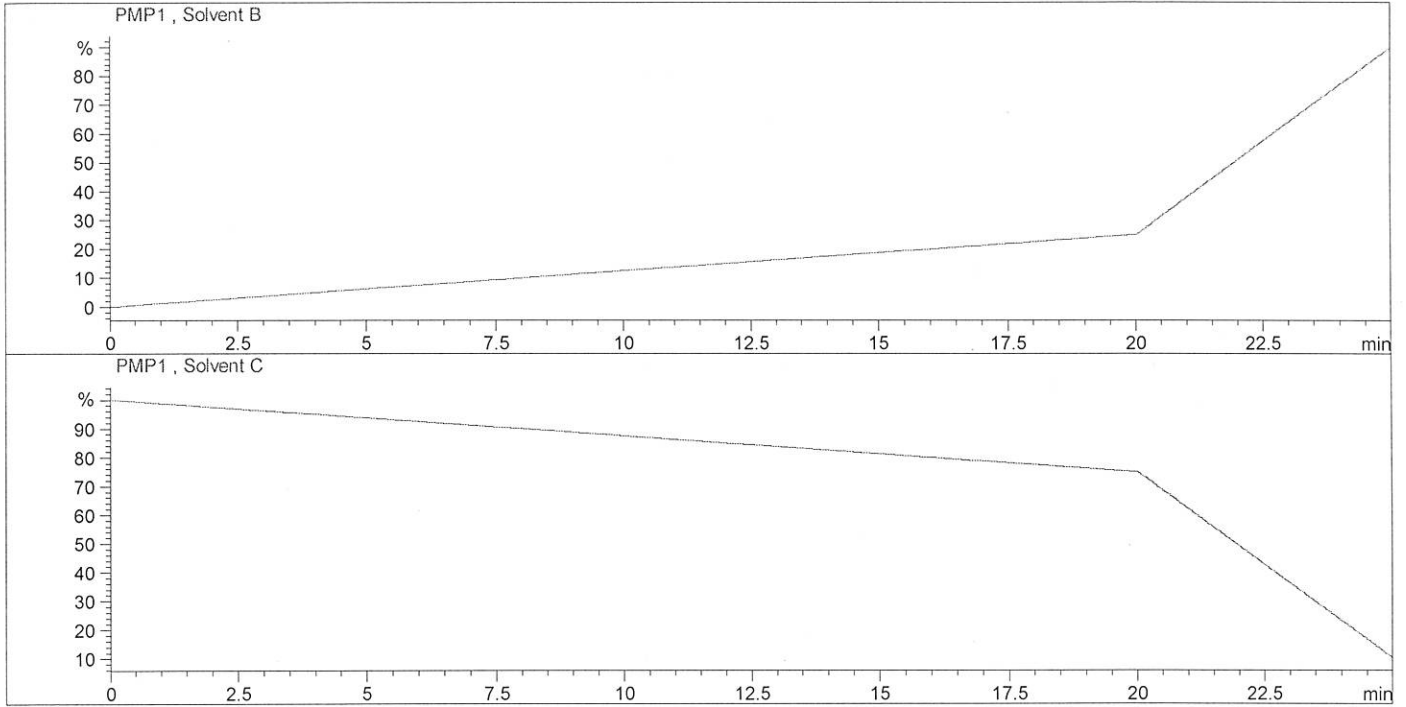

=====  
 Area Percent Report  
 =====

Sorted By : Signal  
 Multiplier : 1.0000  
 Dilution : 1.0000  
 Sample Amount : 10.00000 [ng/ul] (not used in calc.)  
 Use Multiplier & Dilution Factor with ISTDs

Signal 1: DAD1 A, Sig=254,4 Ref=360,100

| Peak # | RetTime [min] | Type | Width [min] | Area [mAU*s] | Height [mAU] | Area %  |
|--------|---------------|------|-------------|--------------|--------------|---------|
| 1      | 2.359         | VB   | 0.0765      | 6.81629      | 1.23308      | 0.0676  |
| 2      | 6.295         | BB   | 0.3405      | 1.00561e4    | 476.01416    | 99.6912 |
| 3      | 24.552        | BB   | 0.1584      | 24.32964     | 2.35719      | 0.2412  |

Totals : 1.00873e4 479.60444

Signal 2: DAD1 B, Sig=210,4 Ref=360,100

| Peak # | RetTime [min] | Type | Width [min] | Area [mAU*s] | Height [mAU] | Area % |
|--------|---------------|------|-------------|--------------|--------------|--------|
| 1      | 1.841         | BB   | 0.0744      | 5.47732      | 1.05818      | 0.0104 |
| 2      | 2.318         | BB   | 0.2105      | 102.97813    | 6.30528      | 0.1946 |
| 3      | 3.379         | BB   | 0.1995      | 158.96597    | 10.68953     | 0.3004 |
| 4      | 4.701         | BV   | 0.1768      | 252.66029    | 19.04232     | 0.4775 |
| 5      | 5.353         | VB   | 0.1646      | 15.05430     | 1.34460      | 0.0285 |

## H NMR: Compound 49

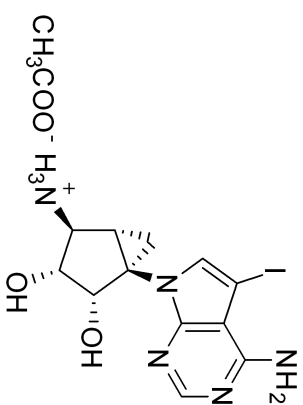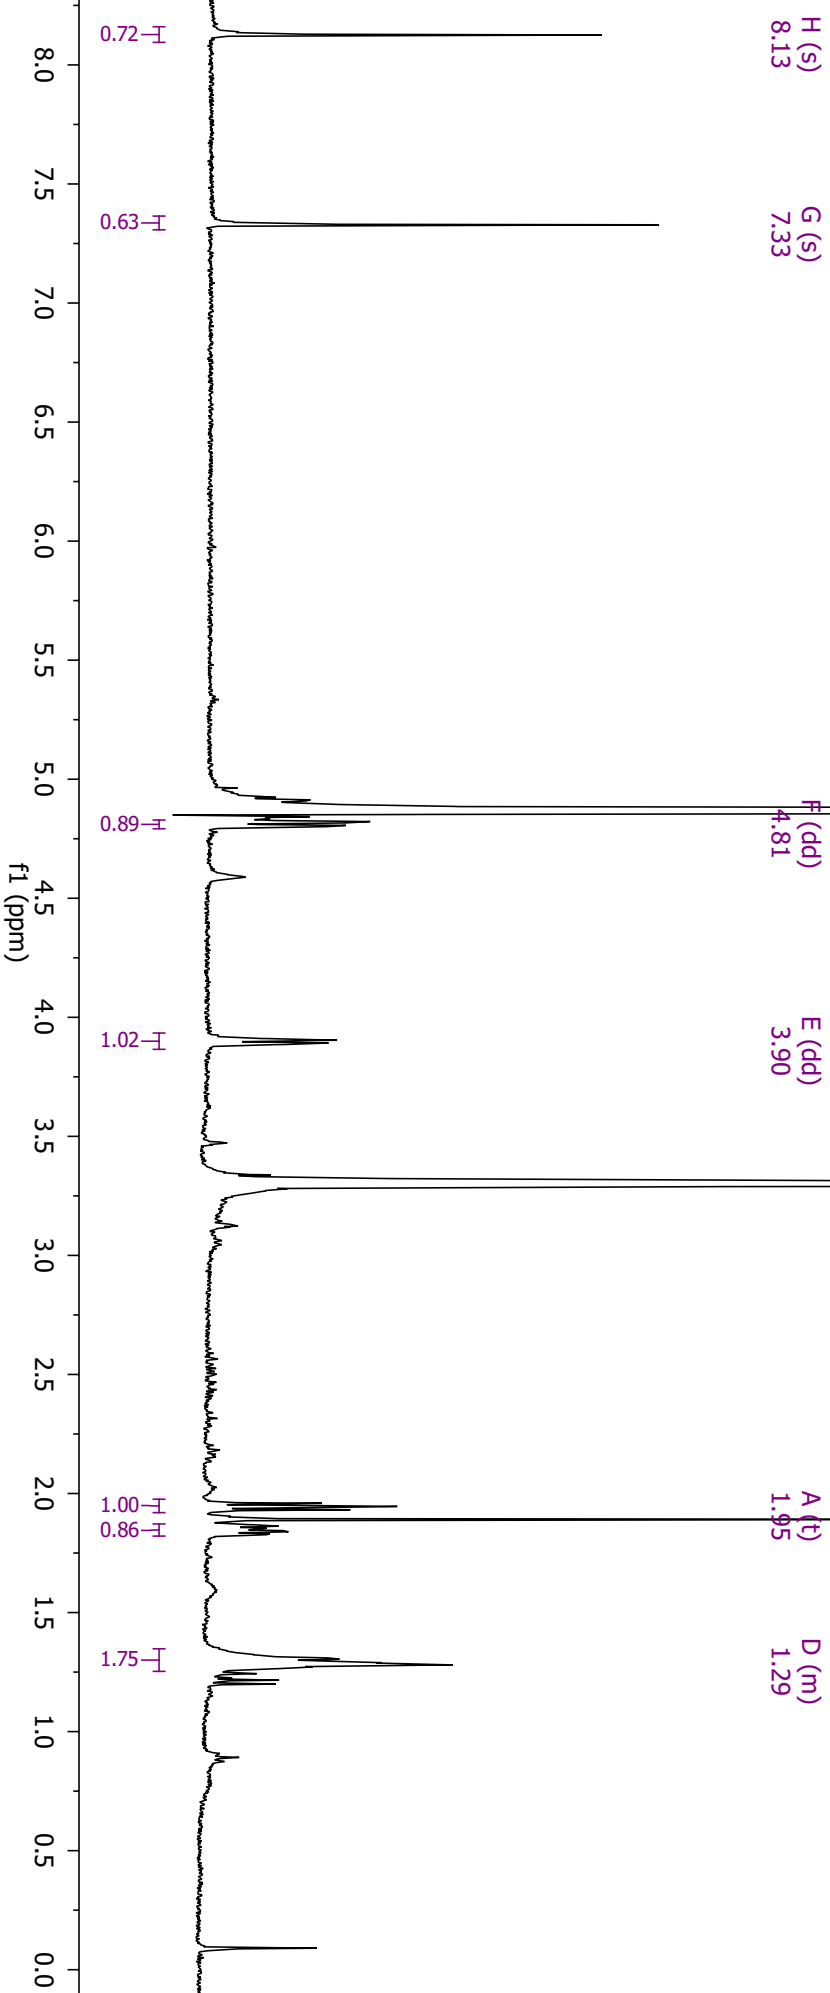

**Single Mass Analysis**

Tolerance = 30.0 mDa / DBE: min = -2.0, max = 1000.0  
 Element prediction: Off  
 Number of isotope peaks used for I-FIT = 3

Monoisotopic Mass, Even Electron Ions  
 32 formula(e) evaluated with 5 results within limits (up to 19 closest results for each mass)

Elements Used:  
 C: 0-120 H: 0-200 N: 5-5 O: 0-35 I: 1-1

29-Dec-2015  
 kst-29dec15--1-172c 26 (0.914) Cn (Cen,2, 50.00, Ar); Sm (SG, 3x5.00); Sb (12.5.00)

TOF MS ES+  
 5.77e+003

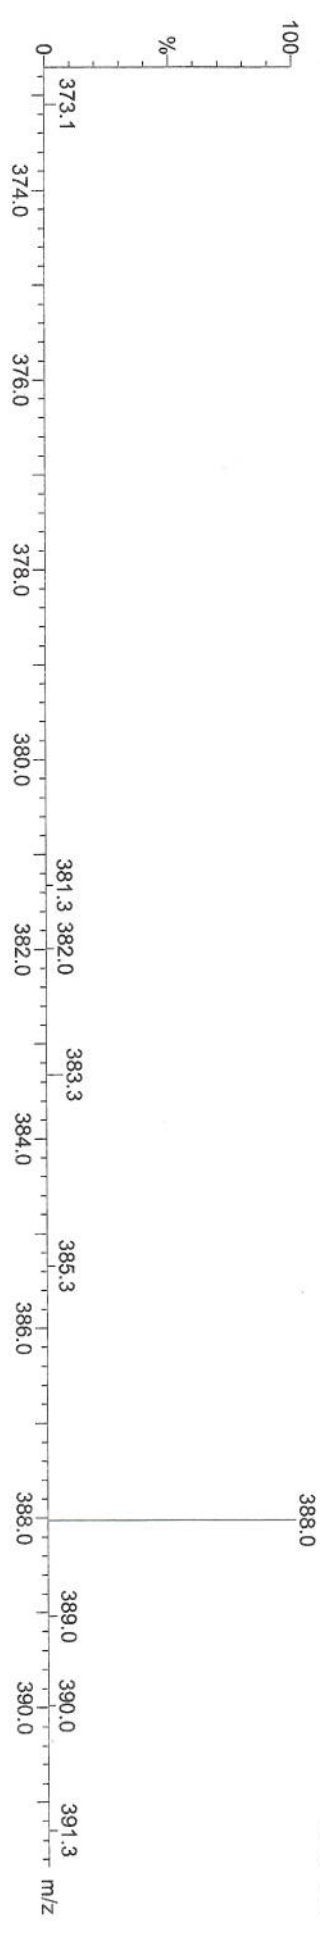

| Mass     | Calc. Mass | mDa   | PPM   | DBE  | I-FIT  | Formula         |
|----------|------------|-------|-------|------|--------|-----------------|
| 388.0268 | 388.0271   | -0.3  | -0.8  | 7.5  | 792.0  | C12 H15 N5 O2 I |
|          | 388.0329   | -6.1  | -15.7 | -1.5 | 183.5  | C5 H19 N5 O7 I  |
|          | 388.0118   | 15.0  | 38.7  | 3.5  | 443.3  | C8 H15 N5 O5 I  |
|          | 388.0059   | 20.9  | 53.9  | 12.5 | 1094.9 | C15 H11 N5 I    |
|          | 388.0482   | -21.4 | -55.2 | 2.5  | 572.5  | C9 H19 N5 O4 I  |

Minimum: 30.0  
 Maximum: 1000.0

=====  
Acq. Operator : SYSTEM  
Sample Operator : SYSTEM  
Acq. Instrument : HPLC-001 Location : 1  
Injection Date : 1/8/2016 1:13:07 PM  
Inj Volume : 10.000 µl  
Method : C:\CHEM32\1\METHODS\ANAL\_00\_25\_15min.M  
Last changed : 1/8/2016 1:11:33 PM by SYSTEM  
(modified after loading)  
=====

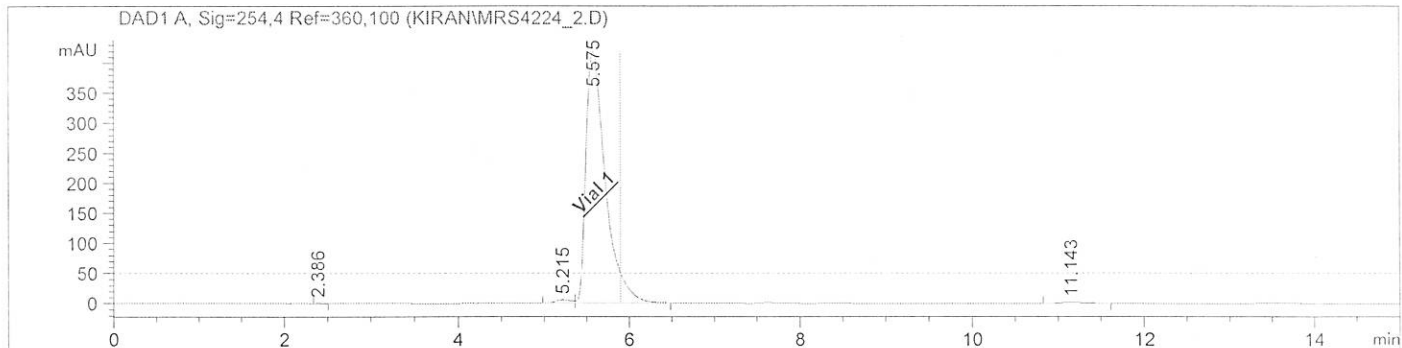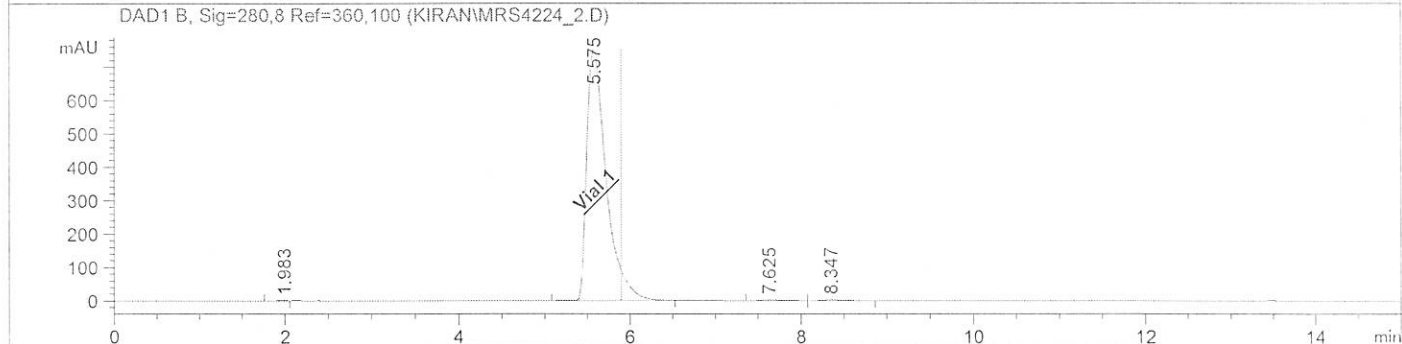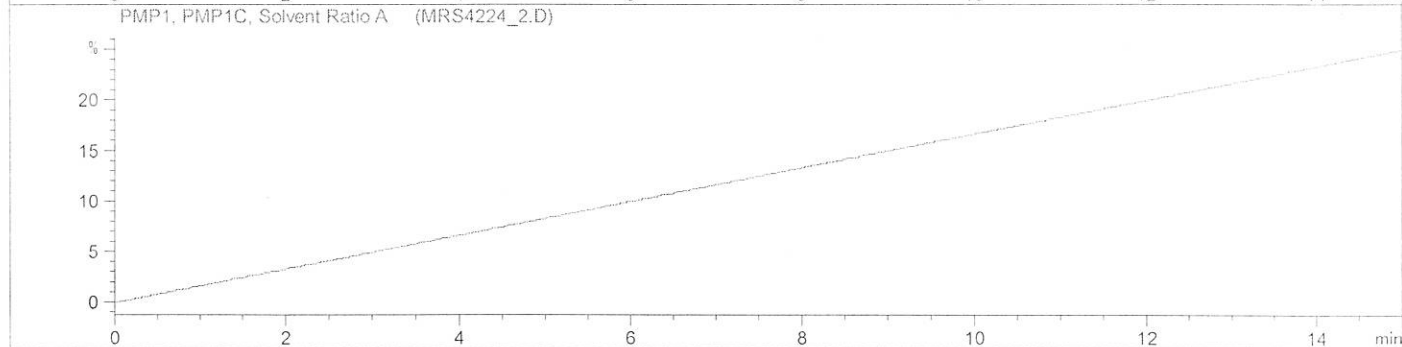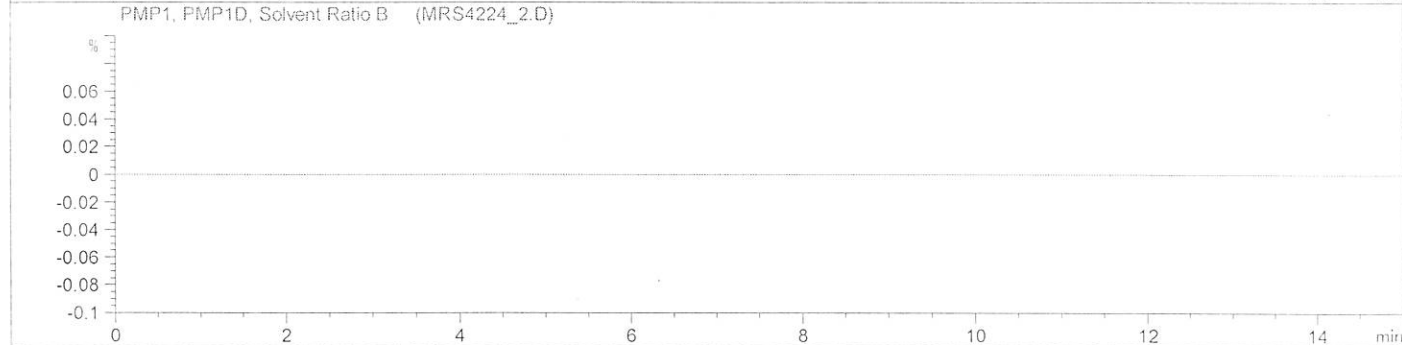

Sample Name: MRS4224\_

```

=====
Acq. Operator   : SYSTEM
Sample Operator : SYSTEM
Acq. Instrument : HPLC-001                Location : 1
Injection Date  : 1/8/2016 1:13:07 PM
                                           Inj Volume : 10.000 µl
Method          : C:\CHEM32\1\METHODS\ANAL_00_25_15min.M
Last changed    : 1/8/2016 1:11:33 PM by SYSTEM
                 (modified after loading)
=====

```

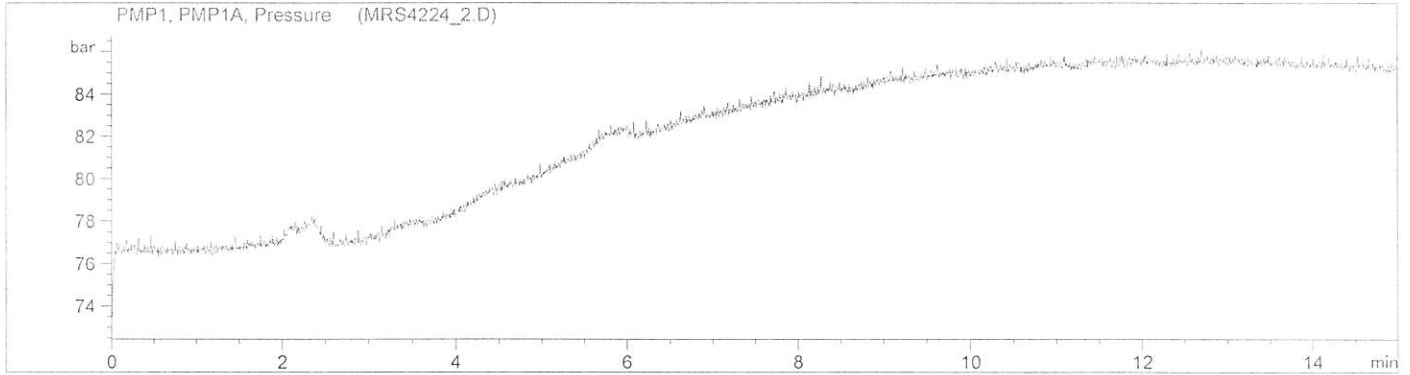

```

=====
Fraction Information
=====

```

```

Fraction collection peak controlled
Maximum peak duration 4 min.
Fractions are collected, when at least one peak detector detects a peak
=====

```

| Frac # | Well # | Location | Volume [µl] | BeginTime [min] | EndTime [min] | Reason | Mass |
|--------|--------|----------|-------------|-----------------|---------------|--------|------|
| 1      | 1      | Vial 1   | 475.42      | 5.4389          | 5.8993        | DAD1   |      |

```

=====
Area Percent Report
=====

```

```

Sorted By      : Signal
Multiplier     : 1.0000
Dilution       : 1.0000
Sample Amount  : 10.00000 [ng/ul] (not used in calc.)
Use Multiplier & Dilution Factor with ISTDs

```

Signal 1: DAD1 A, Sig=254,4 Ref=360,100

| Peak # | RetTime [min] | Type | Width [min] | Area [mAU*s] | Height [mAU] | Area %  |
|--------|---------------|------|-------------|--------------|--------------|---------|
| 1      | 2.386         | BB   | 0.0714      | 6.44840      | 1.26606      | 0.0946  |
| 2      | 5.215         | BV   | 0.2003      | 75.92068     | 5.81609      | 1.1136  |
| 3      | 5.575         | VB   | 0.2486      | 6695.78955   | 418.54694    | 98.2108 |
| 4      | 11.143        | BB   | 0.2997      | 39.61779     | 2.01193      | 0.5811  |

```
Totals :                6817.77643  427.64101
```

## H NMR: Compound 55

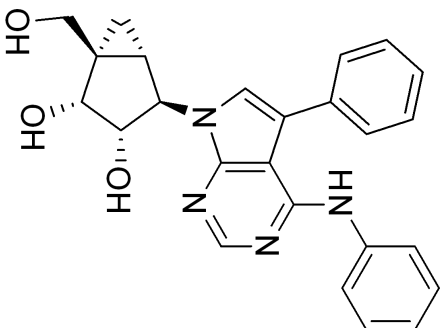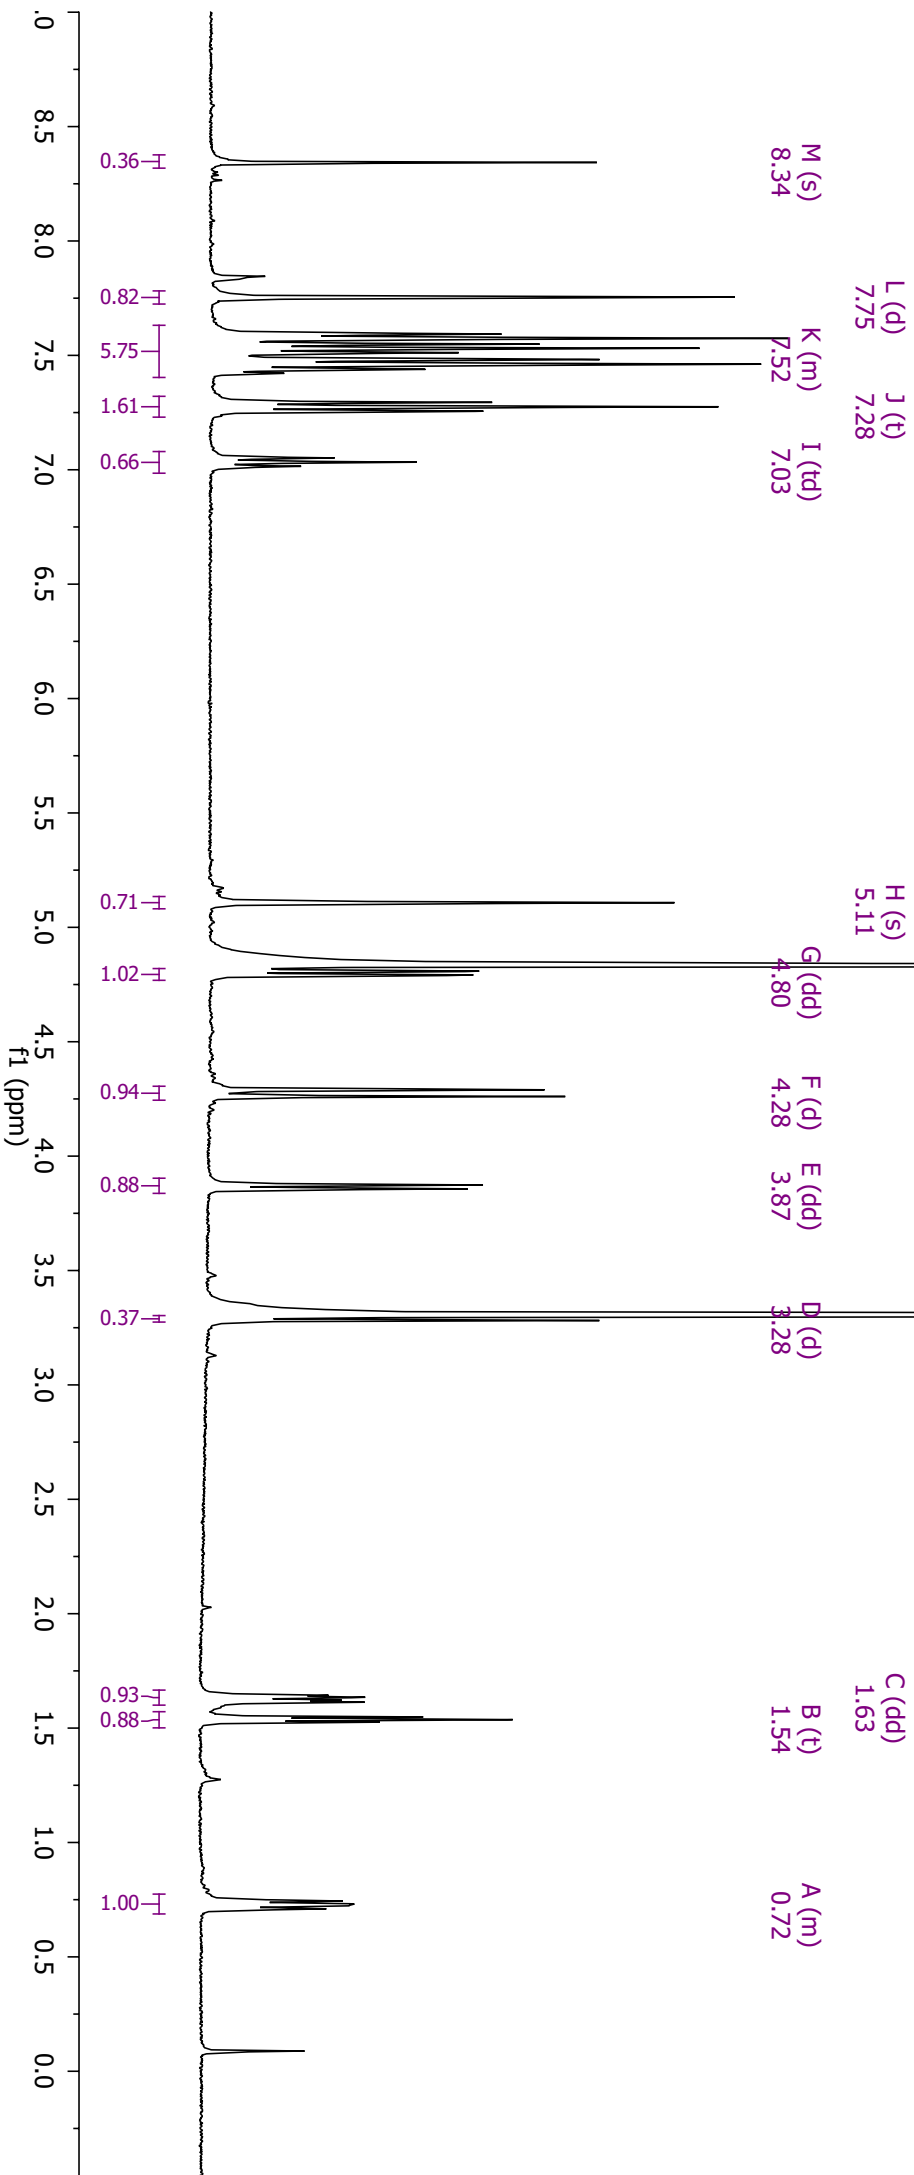

## C NMR: Compound 55

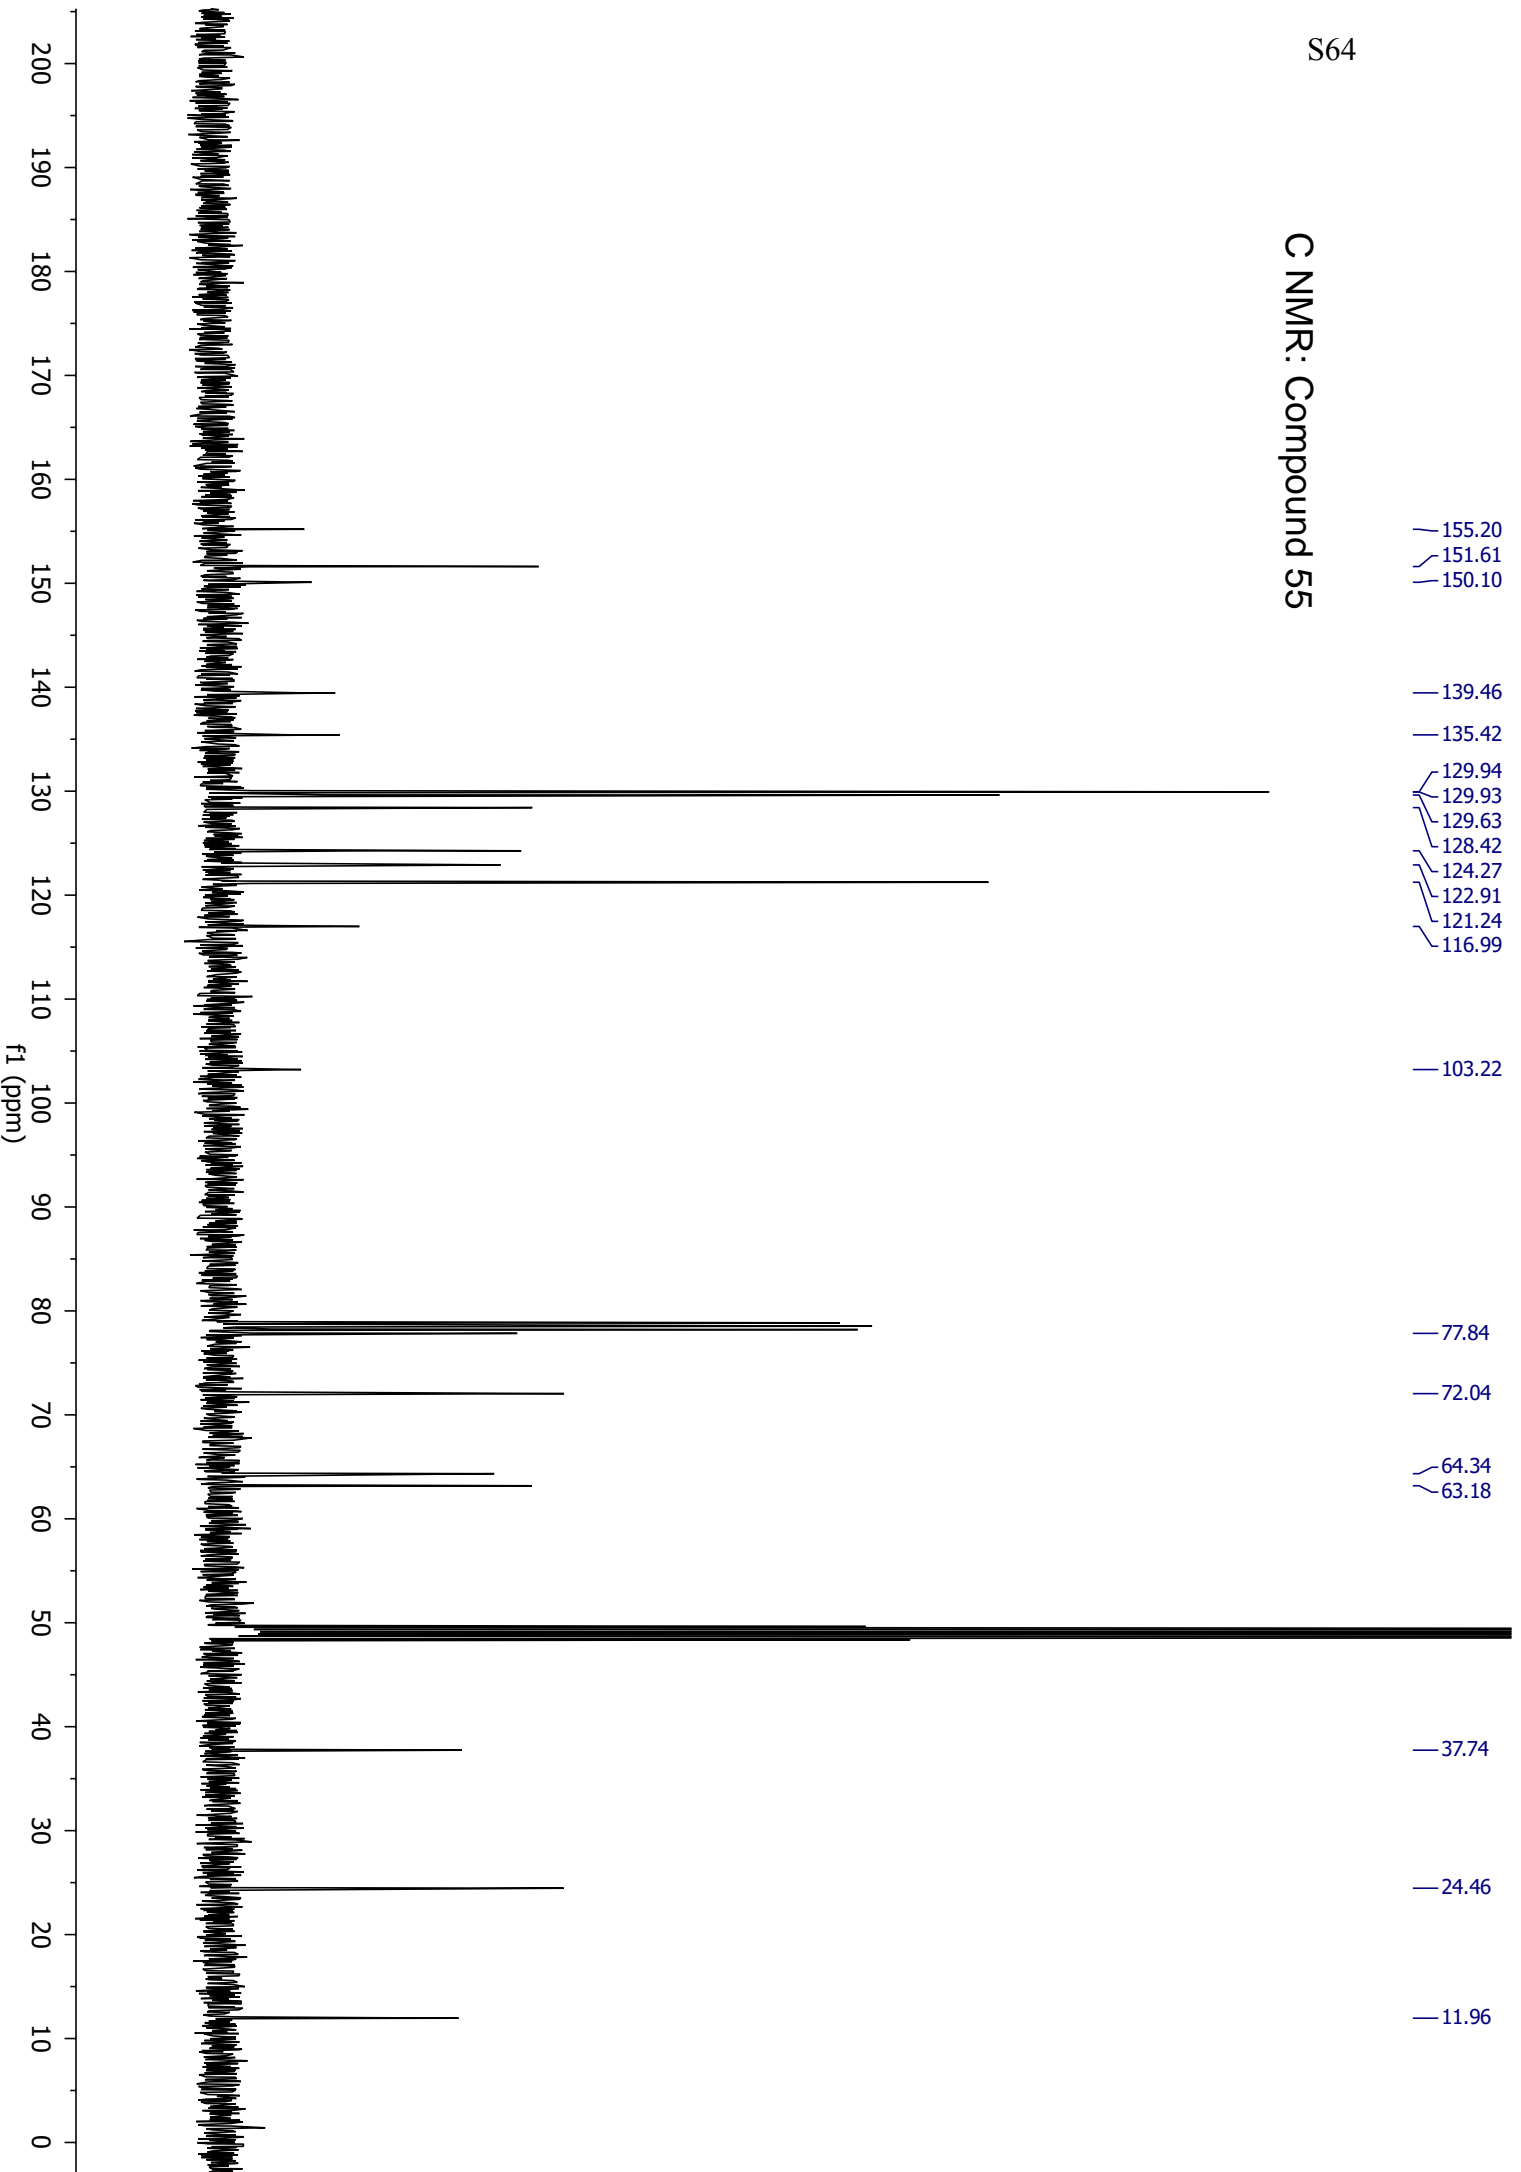



Single Mass Analysis

Tolerance = 10.0 mDa / DBE: min = -2.0, max = 1000.0  
 Element prediction: Off  
 Number of isotope peaks used for i-FIT = 3

Monoisotopic Mass, Even Electron Ions  
 85 formula(e) evaluated with 3 results within limits (up to 19 closest results for each mass)

Elements Used:

C: 0-109 H: 0-200 N: 4-4 O: 0-32

05-Apr-2016

kst-05apr16-2-038 144 (2.663) Cn (Cen,5, 50.00, Ar); Sm (SG, 3x5.00); Sb (12.5,00)

TOF MS ES+  
 2.82e+003

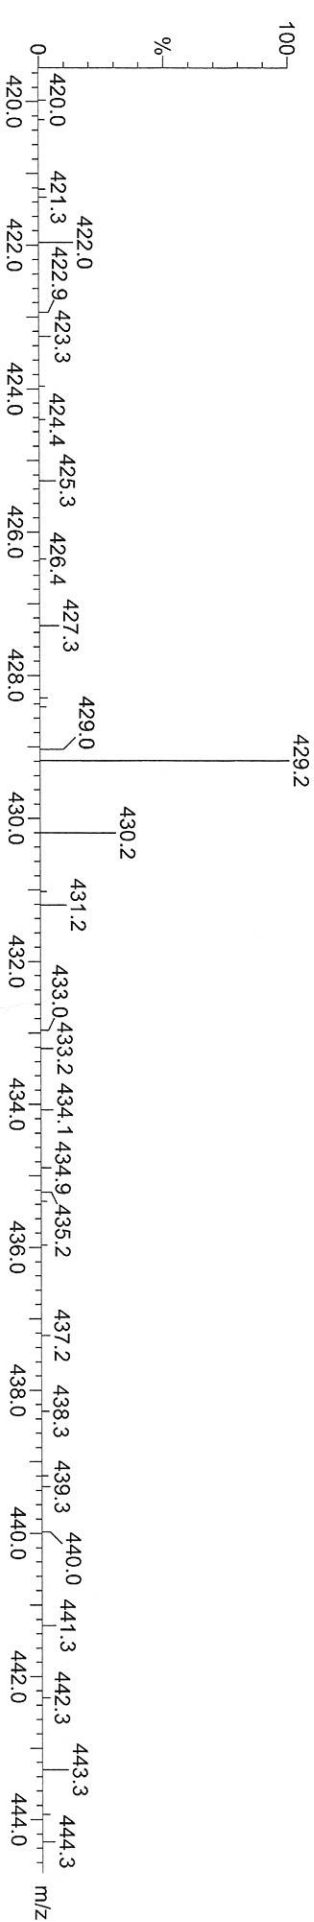

Minimum: 10.0  
 Maximum: 10.0

| Mass     | Calc. Mass | mDa  | PPM   | DBE  | i-FIT | Formula        |
|----------|------------|------|-------|------|-------|----------------|
| 429.1924 | 429.1927   | -0.3 | -0.7  | 15.5 | 38.6  | C25 H25 N4 O3  |
|          | 429.1985   | -6.1 | -14.2 | 6.5  | 76.4  | C18 H29 N4 O8  |
|          | 429.1833   | 9.1  | 21.2  | 2.5  | 124.1 | C14 H29 N4 O11 |

Sample Name: MRS4380

S66

```

=====
Acq. Operator   : SYSTEM                      Seq. Line :    2
Acq. Instrument : HPLC-001                   Location  :    2
Injection Date  : 4/8/2016 1:21:40 PM        Inj       :    1
                                                Inj Volume: 10.000 µl
Different Inj Volume from Sample Entry! Actual Inj Volume : 5.000 µl
Sequence File   : D:\Chem32\1\Data\KIRAN\New 2016-04-08 12-49-37\New.S
Method          : D:\Chem32\1\Data\KIRAN\New 2016-04-08 12-49-37\WASH_00_100_30min.M (
                  Sequence Method)
Last changed    : 4/8/2016 12:49:37 PM by SYSTEM
=====

```

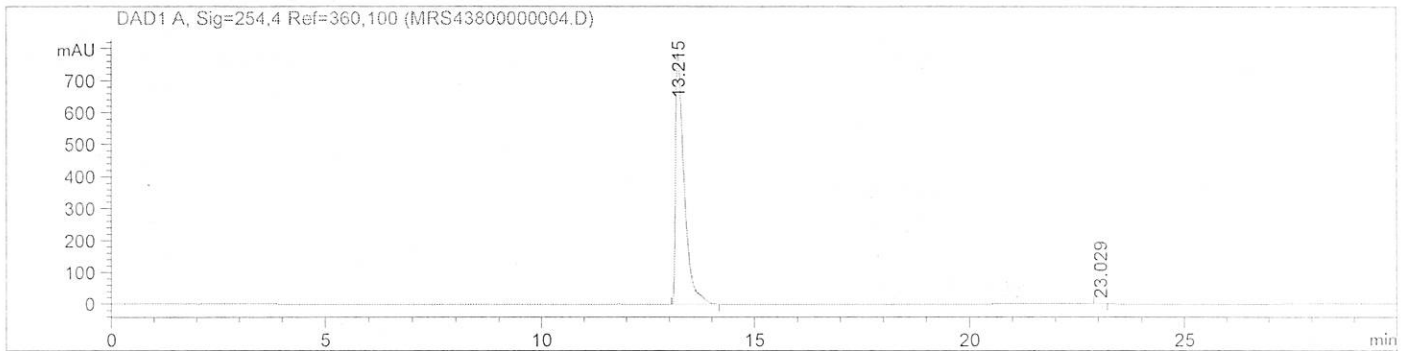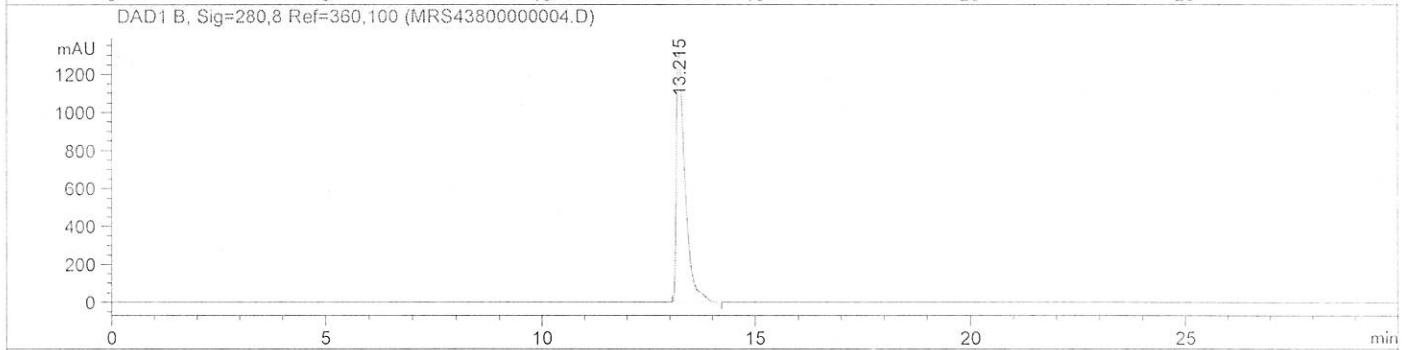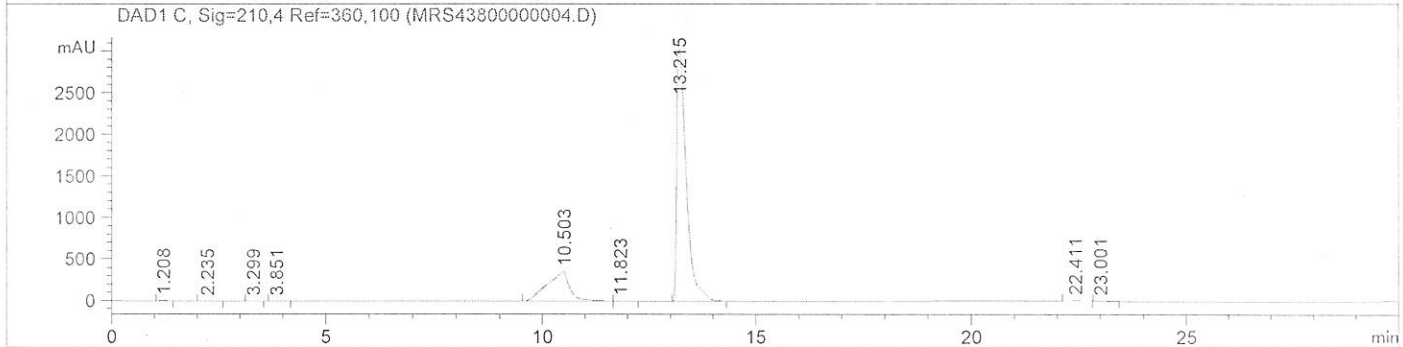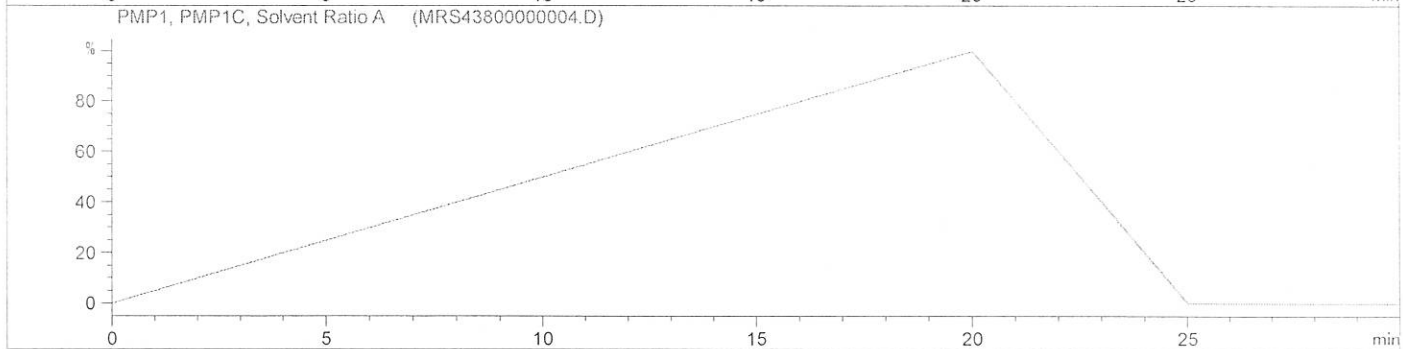

Sample Name: MRS4380

S67

```

=====
Acq. Operator   : SYSTEM                      Seq. Line :    2
Acq. Instrument : HPLC-001                   Location  :    2
Injection Date  : 4/8/2016 1:21:40 PM       Inj       :    1
                                           Inj Volume: 10.000 µl
Different Inj Volume from Sample Entry! Actual Inj Volume : 5.000 µl
Sequence File   : D:\Chem32\1\Data\KIRAN\New 2016-04-08 12-49-37\New.S
Method          : D:\Chem32\1\Data\KIRAN\New 2016-04-08 12-49-37\WASH_00_100_30min.M (
                  Sequence Method)
Last changed    : 4/8/2016 12:49:37 PM by SYSTEM
=====

```

| Peak # | RetTime [min] | Type | Width [min] | Area [mAU*s] | Height [mAU] | Area %  |
|--------|---------------|------|-------------|--------------|--------------|---------|
| 1      | 13.215        | BB   | 0.2027      | 1.10084e4    | 789.17358    | 99.8893 |
| 2      | 23.029        | BB   | 0.1302      | 12.20231     | 1.36629      | 0.1107  |

Totals : 1.10206e4 790.53987

Signal 2: DAD1 B, Sig=280,8 Ref=360,100

| Peak # | RetTime [min] | Type | Width [min] | Area [mAU*s] | Height [mAU] | Area %   |
|--------|---------------|------|-------------|--------------|--------------|----------|
| 1      | 13.215        | BB   | 0.2037      | 1.85816e4    | 1324.40186   | 100.0000 |

Totals : 1.85816e4 1324.40186

Signal 3: DAD1 C, Sig=210,4 Ref=360,100

| Peak # | RetTime [min] | Type | Width [min] | Area [mAU*s] | Height [mAU] | Area %  |
|--------|---------------|------|-------------|--------------|--------------|---------|
| 1      | 1.208         | BB   | 0.1183      | 72.38586     | 8.41594      | 0.1208  |
| 2      | 2.235         | BB   | 0.1386      | 15.27225     | 1.45315      | 0.0255  |
| 3      | 3.299         | BB   | 0.1755      | 12.96953     | 1.06964      | 0.0216  |
| 4      | 3.851         | BB   | 0.1740      | 26.95727     | 2.04216      | 0.0450  |
| 5      | 10.503        | BB   | 0.4517      | 1.28312e4    | 353.28436    | 21.4106 |
| 6      | 11.823        | BB   | 0.2644      | 34.32301     | 1.86786      | 0.0573  |
| 7      | 13.215        | BB   | 0.2259      | 4.66755e4    | 3026.15576   | 77.8843 |
| 8      | 22.411        | BB   | 0.2640      | 171.03448    | 8.31488      | 0.2854  |
| 9      | 23.001        | BB   | 0.2140      | 89.58032     | 5.17464      | 0.1495  |

Totals : 5.99293e4 3407.77840

=====

Summed Peaks Report

=====

Signal 1: DAD1 A, Sig=254,4 Ref=360,100

## H NMR: Compound 57

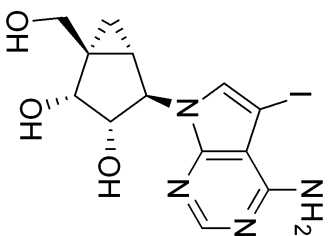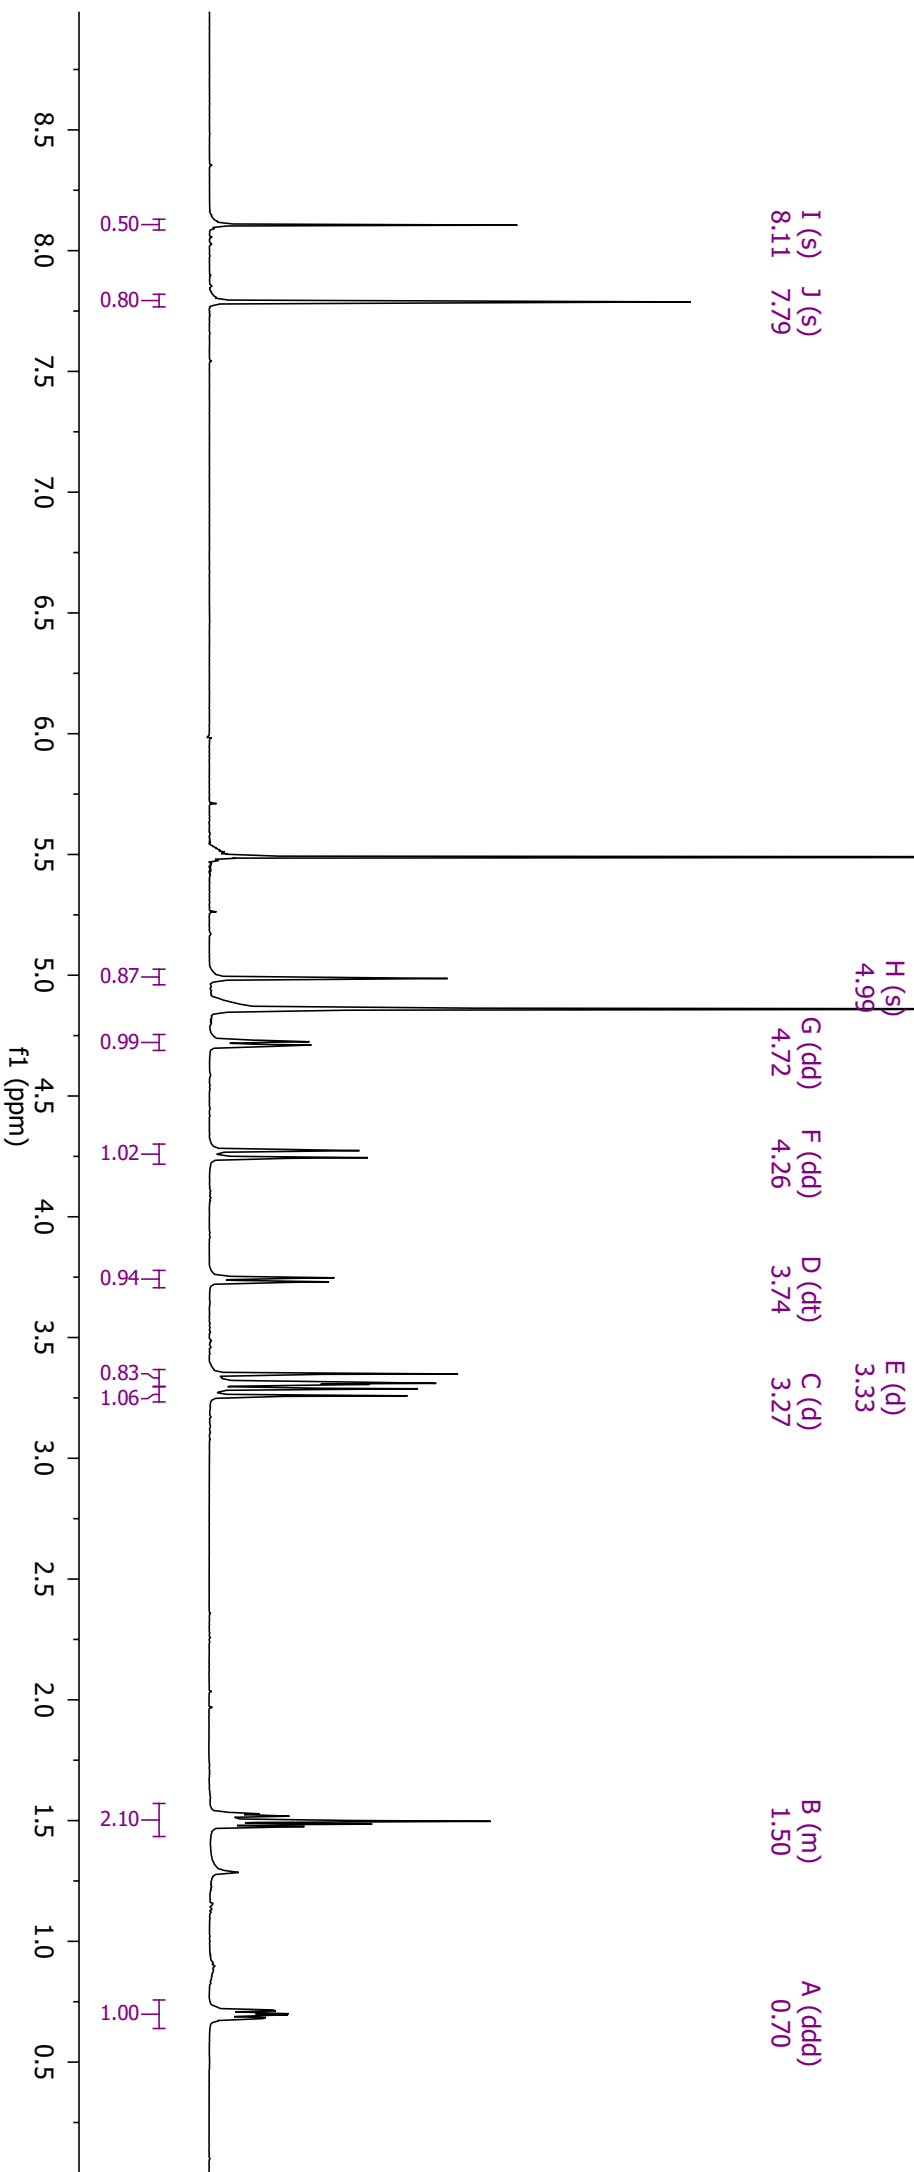

## C NMR: Compound 57

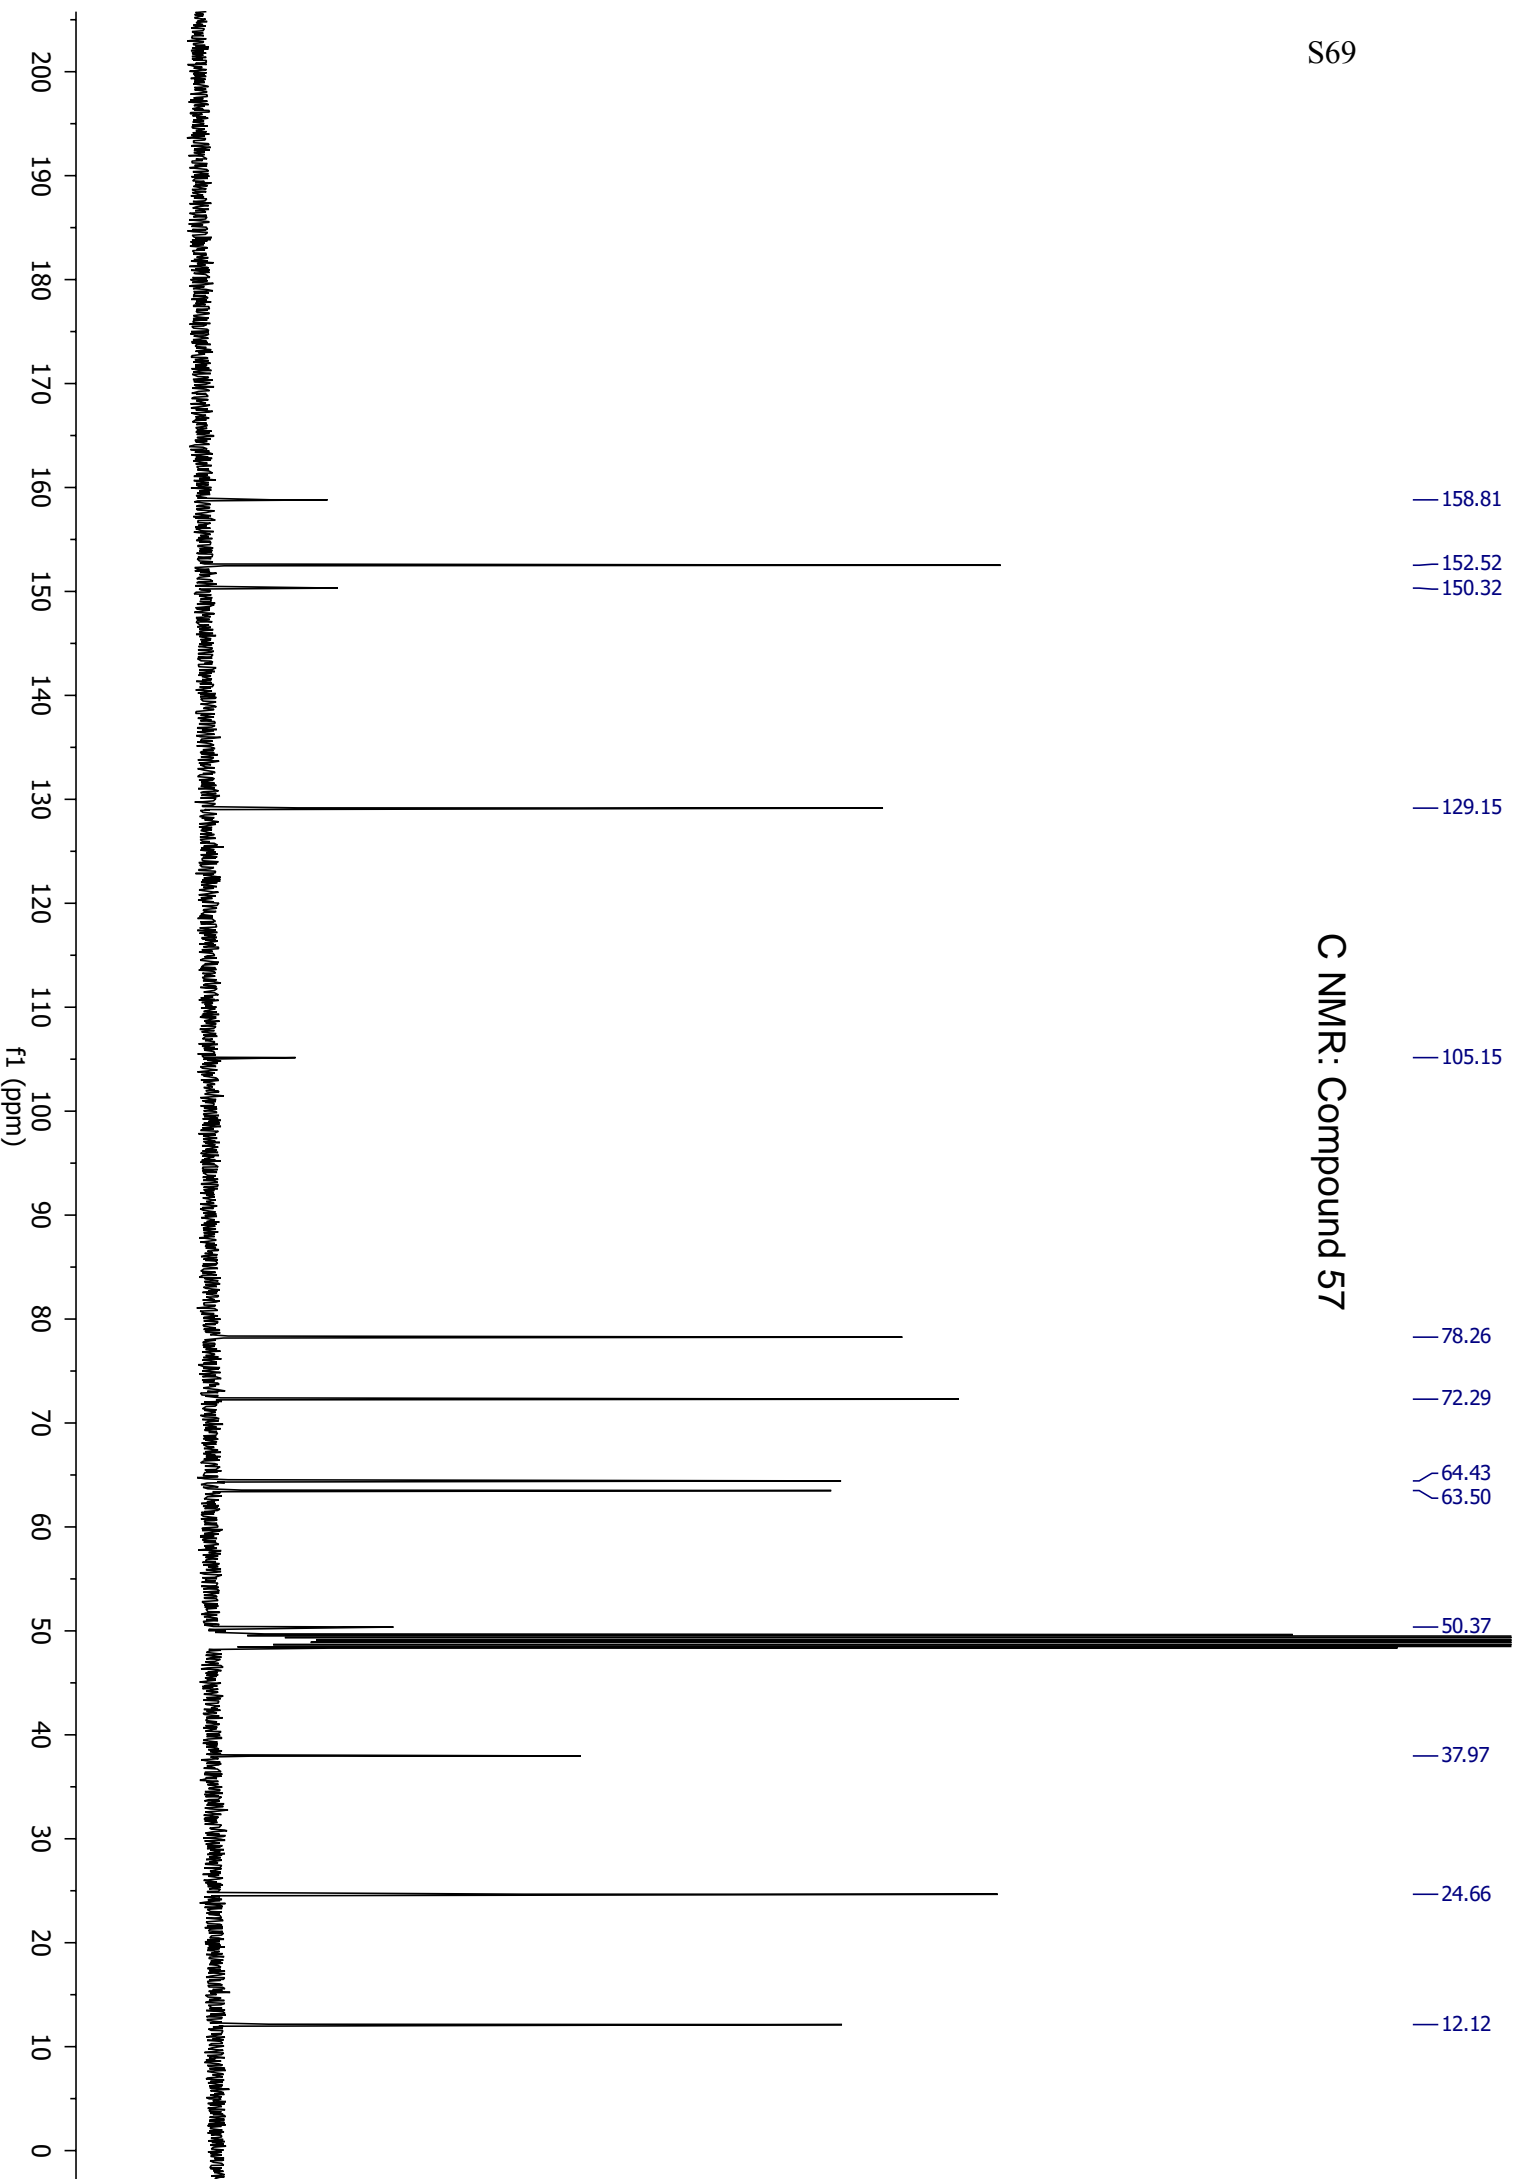

Single Mass Analysis

Tolerance = 30.0 mDa / DBE: min = -2.0, max = 1000.0  
 S70 Element prediction: Off  
 Number of isotope peaks used for i-FTT = 3

Monoisotopic Mass, Even Electron Ions  
 38 formula(e) evaluated with 6 results within limits (up to 19 closest results for each mass)

Elements Used:

C: 0-100 H: 0-200 N: 4-4 O: 0-30 I: 1-1

24-Mar-2016

ket-24mar16-2-032 108 (1.997) Cn (Gen.5, 50.00, Ar); Sm (SG, 1x2.00); Sb (12.5.00)

TOF MS ES+  
 4.32e+003

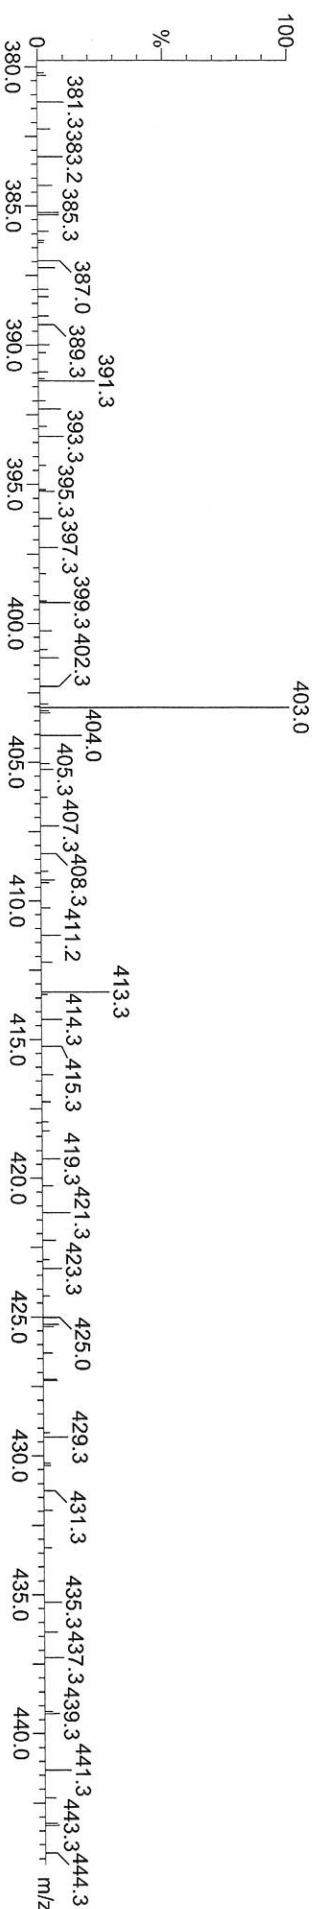

Minimum: 30.0  
 Maximum: 10.0  
 -2.0  
 1000.0

| Mass     | Calc. Mass | mDa   | PPM   | DBE  | i-FTT | Formula         |
|----------|------------|-------|-------|------|-------|-----------------|
| 403.0271 | 403.0267   | 0.4   | 1.0   | 7.5  | 14.8  | C13 H16 N4 O3 I |
|          | 403.0326   | -5.5  | -13.6 | -1.5 | 87.5  | C6 H20 N4 O8 I  |
|          | 403.0420   | -14.9 | -37.0 | 11.5 | 49.6  | C17 H16 N4 I    |
|          | 403.0115   | 15.6  | 38.7  | 3.5  | 60.7  | C9 H16 N4 O6 I  |
|          | 403.0478   | -20.7 | -51.4 | 2.5  | 64.2  | C10 H20 N4 O5 I |
|          | 403.0056   | 21.5  | 53.3  | 12.5 | 65.8  | C16 H12 N4 O I  |

Sample Name: MRS4379

S71

```
=====
Acq. Operator   : SYSTEM                      Seq. Line :    2
Acq. Instrument : HPLC-001                   Location  :    1
Injection Date  : 3/25/2016 5:32:55 PM      Inj       :    1
                                           Inj Volume: 10.000 µl
Different Inj Volume from Sample Entry! Actual Inj Volume : 5.000 µl
Method          : D:\Chem32\1\Data\KIRAN\Kiran_SEQ 2016-03-25 17-05-39\ANAL_A00-50_D100-50
                : _15min.M (Sequence Method)
Last changed    : 3/25/2016 5:05:39 PM by SYSTEM
Additional Info : Peak(s) manually integrated
=====
```

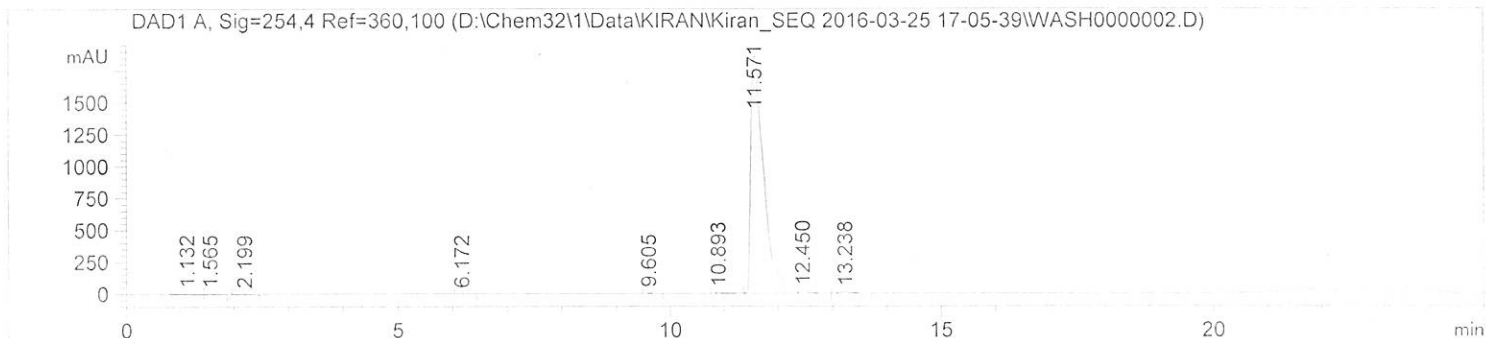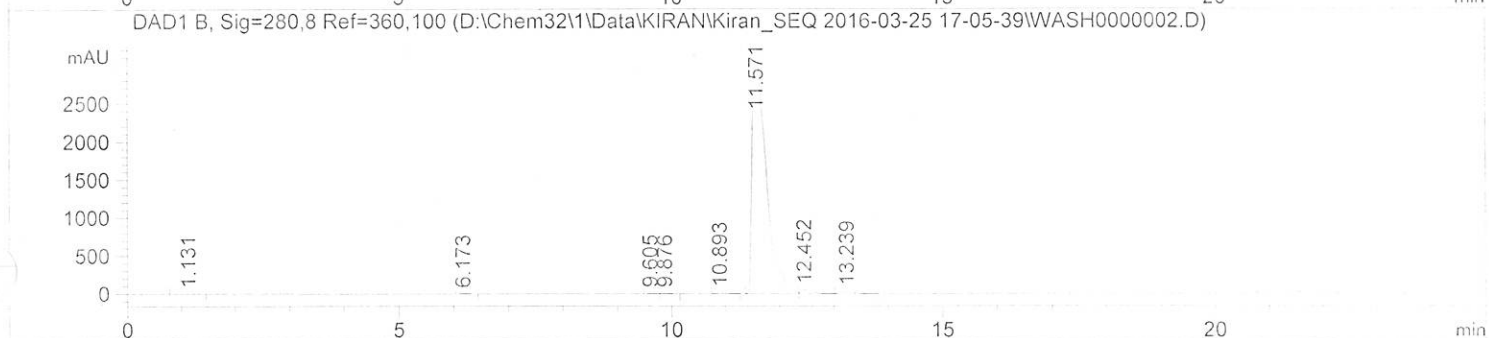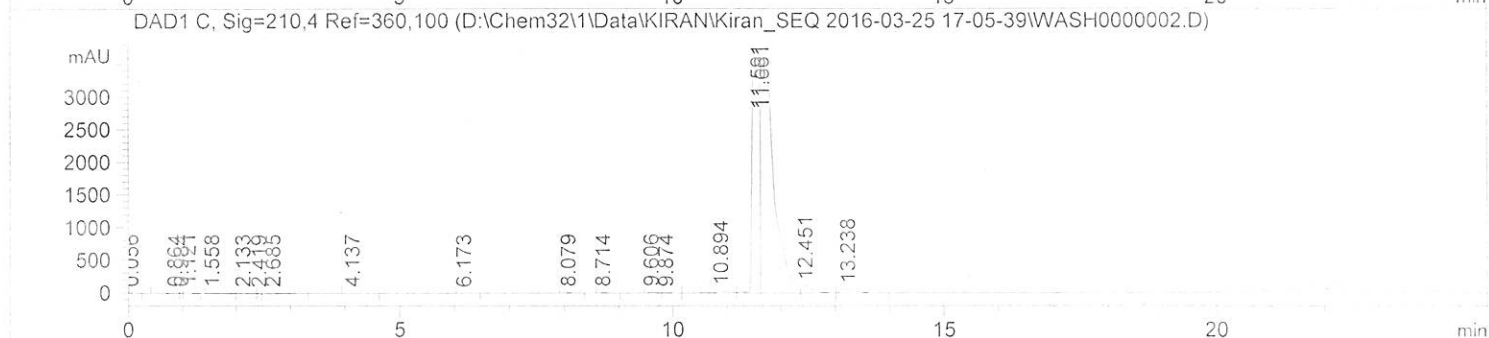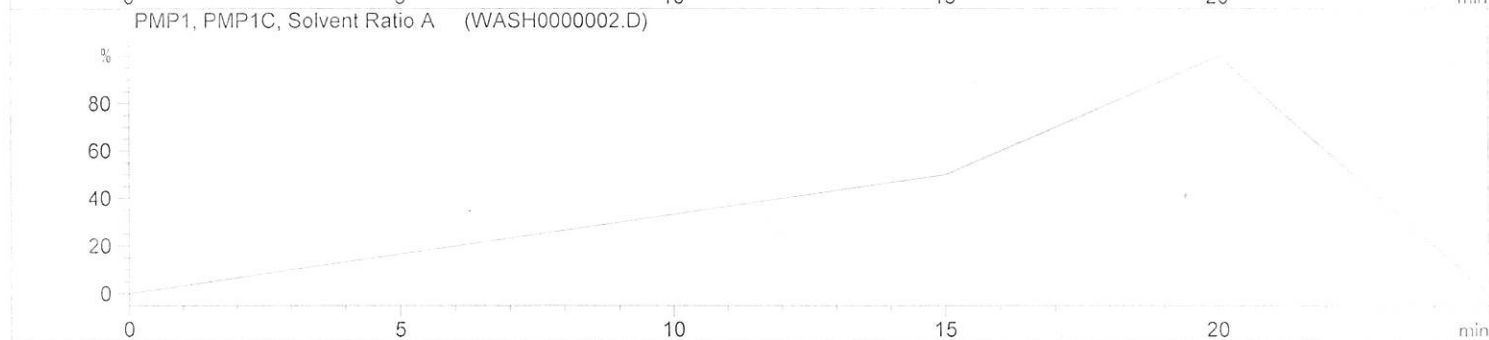

Sample Name: MRS4379

S72

```

=====
Acq. Operator   : SYSTEM                      Seq. Line :    2
Acq. Instrument : HPLC-001                   Location  :    1
Injection Date  : 3/25/2016 5:32:55 PM      Inj       :    1
                                           Inj Volume: 10.000 µl
Different Inj Volume from Sample Entry! Actual Inj Volume : 5.000 µl
Method          : D:\Chem32\1\Data\KIRAN\Kiran_SEQ 2016-03-25 17-05-39\ANAL_A00-50_D100-50
                : _15min.M (Sequence Method)
Last changed    : 3/25/2016 5:05:39 PM by SYSTEM
Additional Info : Peak(s) manually integrated
=====

```

| Peak # | RetTime [min] | Type | Width [min] | Area [mAU*s] | Height [mAU] | Area %  |
|--------|---------------|------|-------------|--------------|--------------|---------|
| 4      | 6.172         | BB   | 0.1511      | 12.17699     | 1.19286      | 0.0382  |
| 5      | 9.605         | BB   | 0.1440      | 23.32392     | 2.34553      | 0.0731  |
| 6      | 10.893        | BB   | 0.2087      | 66.84351     | 4.51630      | 0.2096  |
| 7      | 11.571        | BV   | 0.2401      | 3.10133e4    | 1863.80017   | 97.2628 |
| 8      | 12.450        | VB   | 0.1799      | 223.03877    | 17.83738     | 0.6995  |
| 9      | 13.238        | BB   | 0.2343      | 170.27087    | 10.01568     | 0.5340  |

Totals : 3.18861e4 1914.76489

Signal 2: DAD1 B, Sig=280,8 Ref=360,100

| Peak # | RetTime [min] | Type | Width [min] | Area [mAU*s] | Height [mAU] | Area %  |
|--------|---------------|------|-------------|--------------|--------------|---------|
| 1      | 1.131         | BB   | 0.1702      | 23.39786     | 1.74712      | 0.0406  |
| 2      | 6.173         | BB   | 0.1609      | 14.53150     | 1.40202      | 0.0252  |
| 3      | 9.605         | BV   | 0.1437      | 17.18949     | 1.82830      | 0.0298  |
| 4      | 9.876         | VB   | 0.1481      | 12.95157     | 1.25818      | 0.0225  |
| 5      | 10.893        | BB   | 0.2250      | 145.65126    | 8.99155      | 0.2529  |
| 6      | 11.571        | BV   | 0.2629      | 5.63016e4    | 3114.66797   | 97.7638 |
| 7      | 12.452        | VV   | 0.1815      | 613.07935    | 48.48050     | 1.0646  |
| 8      | 13.239        | VB   | 0.2372      | 460.98810    | 26.72404     | 0.8005  |

Totals : 5.75894e4 3205.09968

Signal 3: DAD1 C, Sig=210,4 Ref=360,100

| Peak # | RetTime [min] | Type | Width [min] | Area [mAU*s] | Height [mAU] | Area % |
|--------|---------------|------|-------------|--------------|--------------|--------|
| 1      | 0.056         | BB   | 0.0644      | 13.41560     | 3.10585      | 0.0133 |
| 2      | 0.864         | BV   | 0.1867      | 151.84935    | 10.37706     | 0.1500 |
| 3      | 0.984         | VV   | 0.0559      | 38.85734     | 9.87189      | 0.0384 |
| 4      | 1.121         | VB   | 0.1244      | 237.18567    | 28.12972     | 0.2343 |
| 5      | 1.558         | BV   | 0.3957      | 209.88603    | 6.69503      | 0.2074 |
| 6      | 2.133         | VV   | 0.2731      | 181.43816    | 8.29697      | 0.1793 |
| 7      | 2.419         | VV   | 0.0653      | 34.35464     | 8.77335      | 0.0339 |
| 8      | 2.685         | VB   | 0.3872      | 273.55505    | 8.83481      | 0.2703 |
| 9      | 4.137         | BB   | 0.2267      | 51.29127     | 3.17124      | 0.0507 |
| 10     | 6.173         | BB   | 0.1526      | 19.17609     | 1.95195      | 0.0189 |
| 11     | 8.079         | BB   | 0.1771      | 21.87146     | 1.83408      | 0.0216 |
